# Supplementary material for: Effect of emotional intelligence on problematic mobile social media use: mediating role of peer relationships and experiential avoidance
Source: Front Psychol. 2025 Jun 19;16:1558733. doi: 10.3389/fpsyg.2025.1558733 (PMC12222163; doi:10.3389/fpsyg.2025.1558733)
Supplement: Supplementary file 2 [file Table_1.xlsx]

## Sheet: S1_Row Data
Gender	Age	WLEIS1_1	WLEIS2_1	WLEIS3_1	WLEIS4_1	WLEIS5_1	WLEIS6_1	WLEIS7_1	WLEIS8_1	WLEIS9_1	WLEIS10_1	WLEIS11_1	WLEIS12_1	WLEIS13_1	WLEIS14_1	WLEIS15_1	WLEIS16_1	PSMU1_1	PSMU2_1	PSMU3_1	PSMU4_1	PSMU5_1	PSMU6_1	PSMU7_1	PSMU8_1	PSMU9_1	PSMU10_1	PSMU11_1	PSMU12_1	PSMU13_1	PSMU14_1	PSMU15_1	PSMU16_1	PSMU17_1	PSMU18_1	PSMU19_1	PSMU20_1	PR1_1	PR3_1	PR4_1	PR5_1	PR15_1	PR2_1	PR6_1	PR7_1	PR8_1	PR12_1	PR14_1	PR9_1
1	22	7	6	4	4	1	4	3	3	7	5	5	6	3	4	3	3	2	1	1	3	2	3	3	1	3	2	2	2	2	1	1	3	1	1	2	3	1	1	2	1	1	2	1	1	2	2	3	3
2	19	5	3	4	6	5	5	5	4	1	2	2	3	4	2	3	3	1	3	2	1	2	4	4	4	5	4	1	3	3	1	5	5	4	3	4	4	2	2	2	3	2	2	2	2	2	3	3	4
1	22	1	3	3	2	6	4	4	4	4	4	5	3	3	4	3	5	3	4	3	4	4	1	2	3	3	2	3	4	3	2	1	3	3	3	5	3	3	3	2	3	2	3	2	3	2	2	2	3
1	23	2	2	4	3	7	6	4	4	1	4	2	3	4	3	3	3	3	4	4	4	4	1	1	2	2	3	3	4	3	2	4	4	3	4	2	3	3	2	3	3	3	3	3	2	2	2	2	4
1	23	3	3	4	2	7	7	6	6	6	4	4	6	7	6	4	5	2	1	3	3	3	2	2	2	2	2	3	1	1	3	2	3	1	3	1	1	2	2	1	2	3	1	1	1	2	1	1	2
1	23	7	6	7	5	4	7	5	4	4	7	4	7	5	5	5	6	2	2	1	3	3	2	1	1	2	3	3	2	3	1	2	2	1	2	3	1	3	3	4	3	3	4	3	3	3	3	3	3
1	22	3	2	3	2	3	4	3	4	4	4	5	3	3	3	4	4	3	3	2	4	2	4	3	3	5	3	3	4	4	3	1	3	2	3	3	2	1	1	2	1	1	4	2	3	3	3	2	2
2	26	5	5	6	5	2	1	1	3	2	4	3	3	4	5	3	3	4	3	4	4	3	2	4	2	3	2	4	4	3	4	5	4	5	5	4	3	2	3	2	3	2	2	3	1	1	2	2	1
2	26	6	5	6	5	6	4	5	4	4	5	3	5	5	4	3	4	4	4	3	3	3	1	2	3	3	1	4	4	5	5	1	2	3	2	4	3	2	1	3	3	3	1	1	2	2	2	2	4
1	22	6	3	4	6	1	1	1	1	4	3	2	3	3	2	2	2	3	2	4	4	3	2	3	2	3	4	5	3	3	4	2	3	2	2	5	4	4	4	4	3	3	3	3	4	3	3	3	3
1	23	6	6	6	4	6	5	6	4	4	7	5	4	4	6	5	5	1	2	2	1	2	1	3	1	2	1	1	2	1	3	2	2	3	2	3	3	4	4	4	3	3	3	4	4	4	3	4	3
1	24	1	1	3	4	1	4	2	1	4	3	5	5	6	6	5	4	1	3	3	3	2	5	3	4	5	3	2	2	3	3	4	4	3	5	4	4	4	3	4	3	4	4	3	3	4	2	3	2
1	25	5	4	4	5	6	6	6	5	3	3	4	2	1	2	3	3	4	5	3	3	3	4	5	3	4	4	5	4	5	3	4	3	4	5	2	2	3	2	2	3	3	1	1	1	1	1	1	3
1	22	4	3	5	5	5	5	4	4	2	1	2	4	6	5	4	5	5	5	5	3	4	4	5	3	4	3	3	3	4	4	4	4	3	5	2	2	1	2	1	1	1	2	3	2	2	2	3	4
2	20	7	5	4	6	5	4	5	5	6	5	5	4	4	3	3	4	1	3	1	3	1	2	2	1	2	1	2	1	1	3	1	2	1	1	2	2	4	4	3	4	4	2	2	3	3	2	3	2
1	22	4	4	4	7	7	5	5	7	6	6	6	6	6	5	7	6	2	2	3	2	2	1	3	1	3	1	1	1	1	1	2	1	1	2	1	1	4	3	3	3	4	3	3	3	4	3	4	3
1	23	3	5	3	3	7	5	7	6	6	5	5	6	1	3	2	2	3	4	4	4	3	3	3	2	3	4	4	3	4	4	4	3	3	4	1	3	3	3	2	3	3	4	4	2	3	3	3	2
1	22	5	4	7	6	6	5	4	6	4	7	4	7	6	4	5	6	1	1	3	3	2	1	1	2	3	3	1	1	1	2	2	1	1	1	1	3	4	4	4	4	4	3	3	3	3	3	3	3
2	20	6	4	5	5	3	3	2	5	2	1	2	3	2	4	3	3	3	4	4	4	4	4	3	5	3	5	2	4	3	3	3	2	3	4	5	5	3	3	3	2	2	2	2	2	2	2	3	1
1	21	4	3	2	4	4	3	4	3	4	3	4	3	2	2	2	4	3	4	2	2	3	5	4	4	5	4	3	3	3	3	2	4	2	3	5	4	1	1	1	1	1	3	3	2	3	2	2	1
1	22	1	2	1	3	7	4	4	5	2	3	4	3	7	5	4	5	2	4	2	3	4	1	2	2	3	2	1	2	2	1	2	3	3	3	3	2	4	3	2	3	2	1	1	2	1	2	2	2
1	23	3	2	4	5	4	5	4	3	1	1	1	2	6	6	4	6	5	5	4	5	5	4	5	4	3	3	3	2	4	2	4	3	3	3	1	3	3	3	2	2	3	3	3	2	3	2	2	2
1	22	6	4	6	4	6	3	4	6	3	3	3	5	6	6	6	3	3	2	3	4	3	2	4	3	2	4	1	3	3	3	2	2	3	2	2	2	2	3	1	2	2	2	2	2	1	2	3	3
1	21	4	5	5	5	6	4	7	7	5	6	6	7	6	5	5	4	2	2	1	1	2	2	2	2	2	3	2	1	3	1	2	2	3	1	1	3	3	3	4	4	4	4	4	3	4	3	4	4
2	22	7	7	4	5	5	5	6	5	2	2	2	4	5	3	3	3	1	3	3	2	2	3	1	2	1	3	3	1	1	2	3	2	3	3	1	3	3	2	2	2	2	3	2	2	3	2	2	1
1	20	3	2	2	3	7	6	4	4	6	6	5	3	6	6	4	3	4	4	3	5	4	1	3	2	2	3	2	3	4	2	4	4	4	4	5	5	4	4	3	4	4	3	4	3	3	3	4	3
2	20	4	3	3	2	4	4	5	5	4	4	2	4	1	1	2	1	5	5	3	5	4	1	3	3	2	3	2	4	2	2	5	4	4	4	4	3	2	2	3	3	3	1	1	2	2	2	1	2
1	24	3	2	2	4	1	2	3	2	5	5	6	5	2	2	2	3	3	3	3	3	3	3	3	1	1	1	2	2	3	1	1	2	2	2	1	3	4	2	3	3	3	3	3	2	3	3	2	3
1	21	7	5	6	4	4	7	5	4	5	7	6	6	7	4	4	5	2	3	3	2	3	2	3	2	2	1	2	1	1	1	2	2	1	3	3	3	3	3	3	3	4	4	3	3	3	4	4	3
1	24	7	5	7	6	6	7	4	5	6	7	4	5	5	6	4	5	2	2	2	1	2	1	2	1	2	3	1	2	1	1	2	2	3	3	2	3	4	3	3	3	3	4	3	4	3	3	4	4
1	22	5	3	5	3	1	1	4	3	7	6	6	4	2	3	3	3	1	3	1	2	2	4	4	3	3	4	1	3	1	1	1	3	3	1	3	4	3	3	2	2	2	1	2	2	2	1	2	1
1	20	7	6	6	6	6	6	4	6	4	2	4	3	3	2	4	3	2	3	3	3	3	4	4	3	3	4	4	5	3	3	3	2	3	3	3	3	1	1	2	1	2	1	1	2	2	1	1	2
2	20	7	6	6	7	4	4	5	5	6	4	7	6	6	7	7	4	3	3	2	2	2	1	3	3	1	1	2	1	2	3	1	3	1	2	2	1	3	4	3	4	4	3	4	3	4	4	3	4
1	25	3	4	4	3	7	5	5	4	4	5	2	3	1	4	4	1	2	4	2	2	2	1	2	3	2	2	4	4	3	3	2	3	3	4	4	4	2	1	2	1	2	4	2	3	3	3	4	4
1	22	5	5	6	5	7	4	4	7	5	4	6	7	5	5	7	6	2	3	4	2	4	3	3	4	3	3	4	3	4	3	1	2	3	1	2	4	3	2	2	2	3	1	2	1	1	2	1	3
2	24	4	5	4	5	5	5	3	4	4	3	3	4	4	2	2	5	2	4	3	3	4	2	3	2	2	2	4	5	3	4	2	2	2	3	4	3	1	2	1	2	1	4	3	2	3	2	3	3
1	23	1	4	3	2	7	6	6	5	3	2	2	4	7	5	4	5	2	2	2	4	3	3	4	4	4	3	3	4	3	4	5	5	3	4	1	3	4	3	3	2	4	2	1	3	1	2	1	3
2	24	3	5	4	5	6	6	4	6	2	3	2	4	5	3	3	3	2	4	2	3	2	4	5	4	4	4	2	3	3	4	2	3	2	2	1	3	3	3	2	3	2	3	2	3	3	3	2	2
1	23	4	5	5	2	1	3	1	4	5	4	5	5	7	7	5	4	3	4	3	2	2	1	3	2	3	2	1	3	1	2	3	3	2	3	1	2	4	3	2	4	4	3	3	3	2	2	3	2
2	21	6	4	5	4	6	4	5	6	6	5	4	5	4	3	5	5	2	3	4	4	2	1	3	3	3	2	5	5	4	5	1	2	2	3	4	3	3	2	3	2	3	4	4	2	3	3	4	3
1	25	7	6	7	6	5	6	6	5	7	7	5	6	7	5	5	5	3	3	2	2	3	3	4	4	4	2	2	3	4	3	1	1	3	2	2	3	3	2	3	3	3	4	3	4	3	3	3	3
1	24	4	4	4	4	1	3	3	1	6	6	5	6	2	3	3	4	3	4	3	3	4	3	3	2	3	4	1	2	2	1	4	4	3	3	1	1	1	2	1	1	1	2	2	1	2	3	3	2
2	19	1	3	4	2	1	3	1	1	3	4	2	2	1	3	2	2	3	3	3	4	3	5	5	5	3	5	4	3	5	4	5	4	3	5	5	3	4	3	4	3	2	1	2	2	1	2	2	4
1	19	6	6	6	4	7	4	5	5	6	3	4	3	7	7	5	5	1	2	2	3	3	4	3	3	4	4	1	1	3	3	4	3	4	4	3	3	1	1	1	2	1	1	1	1	2	2	1	3
1	26	4	7	7	5	5	4	5	4	6	6	4	6	6	6	6	4	1	2	1	2	1	2	3	2	3	2	2	3	2	1	1	3	2	1	2	1	3	4	3	3	4	4	3	3	4	4	3	4
1	24	7	5	5	6	6	4	6	4	7	5	4	7	5	4	3	4	5	5	4	4	3	4	3	5	4	3	2	2	2	4	1	3	2	2	3	4	1	2	1	1	1	2	3	1	2	1	2	1
2	22	7	5	6	4	5	7	6	5	6	6	7	6	6	5	4	4	3	3	1	2	1	2	3	2	1	1	2	1	1	1	2	3	2	2	1	3	4	4	4	4	4	3	3	3	3	4	3	3
2	20	1	4	1	1	7	4	5	6	3	2	3	4	4	4	4	3	2	1	2	1	1	1	1	1	2	1	2	3	2	3	2	3	1	2	2	1	3	3	2	3	3	2	2	2	2	3	1	4
1	21	1	2	3	1	5	5	3	3	2	4	3	4	7	5	7	5	1	2	2	2	1	2	3	3	2	4	5	3	4	3	2	4	2	2	4	5	3	4	4	4	4	3	3	4	4	3	3	4
2	23	7	6	4	5	5	3	5	5	2	4	3	4	2	4	2	2	4	5	5	3	4	2	2	3	2	4	2	4	3	2	3	3	4	3	1	3	2	3	2	1	3	2	1	2	3	1	1	4
1	22	1	2	3	3	1	2	1	2	6	5	6	6	5	4	5	5	2	2	2	3	3	4	5	3	3	3	4	4	4	4	3	2	3	4	4	3	3	2	3	2	3	3	2	2	3	3	2	4
1	22	4	3	5	5	1	2	1	3	3	2	5	3	3	2	4	3	3	2	4	4	4	2	3	4	3	2	5	4	4	4	5	3	5	5	4	4	1	2	1	1	1	2	1	2	2	2	1	3
2	21	6	6	5	6	6	5	4	6	5	3	3	5	6	6	5	4	2	2	4	3	2	2	3	3	2	3	1	2	2	2	4	3	5	4	1	2	1	2	1	2	1	1	1	1	1	1	1	1
2	22	1	2	3	3	5	5	3	6	1	4	3	1	6	3	3	6	1	3	3	1	2	4	5	5	3	3	4	4	4	5	5	4	5	4	3	3	4	2	3	3	4	4	3	2	4	3	3	1
2	23	3	3	5	4	2	3	4	1	7	7	4	4	7	6	6	6	2	2	3	4	2	3	4	4	4	4	1	1	3	2	4	3	3	3	1	1	1	2	2	2	1	1	1	2	1	2	1	3
2	20	6	5	5	5	4	5	3	4	2	2	1	3	7	5	6	4	2	4	2	3	2	5	3	4	5	5	2	3	3	2	5	5	5	5	4	3	2	2	2	1	2	2	2	3	1	2	3	4
1	23	6	6	3	6	7	5	4	6	6	5	4	5	7	5	6	6	3	4	3	3	4	1	2	2	1	2	4	4	5	3	3	2	2	2	2	4	3	3	3	2	2	2	2	3	2	1	1	4
2	20	7	7	5	5	1	2	2	3	6	4	6	6	3	3	2	3	1	2	1	1	1	1	2	3	1	3	3	1	3	1	1	3	3	3	2	2	4	4	3	4	3	3	3	4	3	4	3	3
2	21	6	5	6	6	2	3	1	3	7	4	5	7	4	2	3	3	5	3	4	4	4	2	4	3	4	3	3	4	4	2	3	2	3	2	3	3	2	3	2	3	3	4	2	2	3	3	4	1
2	24	3	3	3	4	7	4	4	6	7	4	6	6	4	4	4	3	1	3	1	1	2	2	3	1	3	3	2	2	3	2	3	1	2	1	2	1	4	2	3	2	3	1	2	2	2	2	2	1
1	19	6	5	6	4	7	5	5	6	6	6	5	5	6	5	5	4	4	3	3	3	4	2	4	3	4	3	3	2	3	4	5	3	5	3	1	3	3	3	3	3	3	1	2	1	2	1	1	3
2	22	6	5	4	5	1	2	3	2	4	4	3	5	6	5	5	5	3	2	4	4	3	3	4	3	2	3	4	4	4	5	3	3	4	3	3	2	1	2	2	1	2	3	2	2	3	2	2	1
2	22	2	3	3	4	1	3	4	4	6	5	6	6	1	4	2	1	4	4	3	3	4	3	4	4	3	4	1	3	1	2	2	4	3	2	2	4	3	2	3	3	2	2	2	3	3	2	2	4
2	26	4	3	5	5	6	5	4	6	5	4	6	3	6	5	3	4	4	4	4	4	3	4	4	4	4	3	3	4	3	3	1	1	2	3	1	3	3	3	3	3	3	1	1	1	1	1	2	2
1	25	5	4	4	4	7	6	6	6	7	7	5	7	7	6	4	7	2	1	1	2	3	2	3	1	3	1	2	3	2	2	1	1	3	2	1	3	4	4	3	3	4	3	4	4	4	4	3	4
2	23	2	2	2	2	3	3	4	3	4	2	4	3	5	3	3	5	3	3	2	3	4	3	4	3	4	3	2	2	3	3	3	4	3	3	1	3	1	2	1	2	2	3	2	3	2	2	3	4
1	25	1	2	1	1	3	3	2	2	4	5	5	5	1	2	1	2	5	4	3	4	4	3	4	3	4	3	3	4	4	3	1	3	3	2	3	3	3	3	4	4	3	3	3	4	3	3	3	4
1	26	3	3	2	3	3	5	3	2	7	5	5	7	7	6	5	5	2	2	2	3	3	2	2	2	2	4	5	5	4	5	1	3	3	1	5	5	3	3	3	4	3	4	4	3	3	4	4	4
1	22	4	3	5	5	3	3	4	3	1	2	2	2	1	3	2	2	4	3	5	3	4	2	2	3	2	3	1	3	1	2	4	3	4	5	1	2	3	3	3	3	3	4	4	4	4	4	3	4
1	22	6	6	6	5	3	2	5	3	2	3	1	4	5	4	4	5	1	1	1	2	2	2	3	4	3	2	2	4	2	2	3	4	4	4	3	4	2	3	2	2	1	2	2	2	1	2	3	4
1	22	3	3	3	2	5	4	4	4	2	3	1	3	4	3	3	3	3	4	4	2	4	4	3	4	4	4	1	3	2	1	1	2	2	2	5	5	3	2	2	2	2	1	1	1	2	1	2	2
1	22	1	3	2	3	1	2	3	4	7	6	4	4	2	4	4	2	3	1	3	3	2	1	3	3	3	3	3	2	2	3	2	2	1	2	3	1	2	2	2	3	2	3	2	2	2	3	3	1
1	23	2	4	2	2	6	3	3	5	5	4	5	6	1	1	3	3	3	4	3	3	4	4	3	5	3	5	3	2	3	4	3	4	4	3	2	3	1	2	1	1	1	3	2	2	2	3	2	2
1	20	2	4	4	1	4	5	4	5	6	4	6	4	1	1	1	3	2	3	2	3	4	5	5	4	4	5	3	3	3	4	2	3	2	2	1	2	4	2	3	3	4	2	2	3	2	2	1	2
1	23	7	7	6	4	1	3	2	4	7	5	4	6	5	3	5	3	1	2	2	1	3	1	2	2	3	3	5	4	5	5	2	3	3	4	5	5	1	1	1	2	2	3	2	2	3	2	3	4
1	18	6	5	5	6	6	7	6	6	5	6	4	6	6	6	6	7	3	3	2	3	3	1	2	3	1	1	5	5	5	3	4	3	4	3	2	3	4	4	4	3	3	4	2	2	3	4	3	3
1	22	3	4	5	5	5	3	3	5	1	2	3	3	4	4	3	4	5	3	4	4	4	3	3	3	4	3	4	4	4	4	3	3	3	3	2	3	3	3	3	2	3	2	2	2	2	3	2	4
1	27	3	2	2	4	7	6	5	4	3	2	4	3	3	2	3	3	3	3	3	4	4	2	3	3	3	2	1	1	2	3	1	1	2	1	5	4	4	3	3	2	3	2	2	2	2	3	3	4
1	26	7	7	6	4	3	4	3	2	4	2	4	5	3	5	4	4	2	4	4	2	3	5	4	4	5	3	5	4	4	3	4	4	5	4	2	3	1	1	2	1	2	2	1	2	2	3	1	4
1	22	4	4	3	2	3	2	3	4	1	2	1	1	4	5	2	5	5	5	3	5	3	1	2	3	1	2	2	4	4	3	1	1	1	2	4	4	2	1	2	2	1	3	2	3	2	2	2	2
1	23	5	6	4	3	2	2	4	2	3	4	2	3	2	4	3	3	5	3	3	5	4	2	2	4	3	2	5	5	4	5	1	3	2	2	1	3	1	1	2	2	2	3	2	3	3	3	3	4
1	24	7	5	7	4	7	6	6	5	5	4	4	6	7	5	5	6	1	3	2	1	3	1	3	2	2	2	4	4	4	4	5	4	4	3	1	3	3	2	3	3	2	1	2	1	1	2	2	3
1	23	6	5	6	7	6	5	6	6	7	7	5	6	4	7	5	5	5	4	4	4	5	4	5	3	3	3	2	3	2	2	3	3	4	3	2	2	3	4	4	4	3	4	4	3	3	4	3	4
1	22	3	5	2	3	5	4	4	3	4	4	4	5	1	2	3	2	5	4	4	4	4	3	2	4	4	4	1	2	2	2	3	2	4	3	4	4	1	1	1	1	2	3	3	3	2	2	2	3
1	24	7	4	6	7	5	3	5	5	7	4	4	6	2	4	3	2	2	2	2	2	3	4	4	3	3	4	2	2	2	2	3	4	2	2	4	5	3	3	2	2	3	2	1	2	3	3	3	4
1	24	6	7	4	6	7	5	7	4	4	7	7	7	6	5	7	4	1	1	2	1	3	1	2	1	3	2	2	1	3	3	2	2	1	1	3	2	3	4	4	3	3	4	3	3	4	4	4	4
1	21	6	4	5	4	1	1	4	1	2	4	2	1	3	5	3	5	2	3	2	2	3	4	4	4	3	4	1	3	2	3	5	4	5	5	4	3	4	3	3	2	3	1	2	1	2	2	2	2
1	23	6	3	4	6	4	5	3	3	3	3	3	5	5	3	5	6	5	5	5	4	5	3	4	4	4	3	3	4	3	2	5	4	5	5	5	3	2	1	2	2	1	1	2	1	1	1	1	3
1	21	2	2	3	4	2	1	3	1	1	1	1	4	6	3	3	6	2	3	2	3	2	1	3	2	2	1	1	2	3	3	2	3	2	2	5	4	3	2	2	3	3	4	4	4	4	2	3	4
2	20	7	5	5	6	5	5	4	3	3	3	3	2	4	5	5	5	4	3	4	3	3	3	2	3	3	4	1	3	3	3	4	3	5	3	3	3	3	3	2	3	3	3	3	2	2	2	2	2
2	22	7	6	5	6	4	5	5	4	3	4	5	2	7	5	4	7	2	2	3	2	2	1	1	2	2	1	1	2	2	3	1	2	2	2	1	1	4	3	3	3	4	4	3	3	3	3	3	4
2	22	4	4	3	3	6	5	3	4	7	6	7	5	7	7	4	5	1	2	3	2	2	2	4	4	4	3	3	2	3	2	1	2	3	2	5	4	4	4	3	3	3	2	2	3	1	2	3	3
2	21	5	7	7	4	7	6	4	4	5	7	5	6	7	7	7	6	1	1	1	1	3	2	3	2	3	3	2	1	2	2	1	2	2	1	2	2	3	3	4	3	3	4	3	3	4	3	3	3
1	23	6	6	5	6	4	3	2	5	3	3	3	2	5	4	5	3	3	3	3	2	3	4	4	4	4	4	3	3	2	4	1	1	1	3	5	4	4	2	3	3	4	3	3	3	3	2	2	4
1	25	1	2	2	2	5	6	4	4	5	4	6	3	2	2	3	4	1	3	2	3	3	1	2	3	3	1	3	3	3	1	1	1	2	1	2	2	4	4	4	3	3	1	2	2	1	2	1	2
1	21	7	7	4	5	3	3	4	3	2	4	3	2	5	6	5	6	4	3	3	3	5	3	2	3	4	4	2	3	4	3	2	2	3	2	3	4	3	3	2	3	2	1	2	1	2	1	1	1
2	22	7	4	4	6	1	1	4	2	5	3	6	4	4	2	3	2	2	4	3	3	2	5	4	4	5	5	3	3	4	4	5	4	5	5	2	4	4	3	3	2	2	1	1	1	1	2	1	2
1	22	6	5	6	6	5	3	5	6	7	4	5	6	4	5	4	4	4	3	3	5	3	3	4	3	4	3	3	3	2	2	3	3	3	4	5	4	4	3	3	2	3	3	2	2	3	2	3	2
2	23	1	2	3	4	4	5	2	4	7	4	6	7	3	3	3	3	2	4	3	2	2	1	1	1	2	3	3	2	3	4	1	3	3	3	2	3	2	2	3	3	1	2	2	2	3	3	3	4
2	26	7	4	5	7	6	4	4	6	7	6	6	7	6	5	5	5	1	2	1	1	2	3	2	1	3	3	2	1	2	1	1	1	2	2	1	3	3	4	4	3	3	3	3	4	4	4	4	3
2	19	5	4	4	3	7	4	6	6	2	2	2	3	4	2	5	3	1	3	1	2	1	3	2	3	3	4	4	3	3	4	1	3	2	1	4	3	3	2	3	3	2	4	3	2	2	4	3	3
2	22	5	5	5	3	3	3	4	2	2	2	2	3	6	5	4	4	2	4	2	3	2	1	2	3	3	3	3	2	3	4	4	4	4	3	1	2	3	2	2	2	2	3	2	3	3	3	2	1
2	23	6	5	4	6	1	1	2	3	2	2	4	3	2	3	4	3	2	4	3	2	4	2	3	2	2	3	2	3	3	3	4	5	3	4	4	4	1	1	1	2	2	3	2	2	3	3	2	4
2	22	2	3	1	4	7	5	4	5	6	6	4	6	3	2	2	4	3	4	3	2	3	3	3	2	2	3	1	2	1	2	5	4	4	5	1	3	2	2	2	1	2	3	3	2	3	2	3	4
2	22	7	5	4	4	7	6	5	6	5	4	4	5	5	4	5	5	4	3	5	3	4	1	3	3	2	2	2	3	2	2	4	3	3	5	2	4	3	3	2	2	3	4	3	3	3	4	3	2
2	22	1	1	3	3	1	2	3	3	4	4	5	2	4	4	2	5	3	4	3	4	3	4	5	4	3	4	3	2	3	4	4	3	3	5	5	5	1	1	2	2	2	2	1	1	2	1	2	1
2	22	4	2	5	3	7	4	5	4	1	3	1	1	5	5	5	4	2	3	2	3	2	3	2	3	4	4	1	3	2	3	4	4	3	3	4	4	2	3	3	3	2	4	3	4	3	2	3	2
1	24	4	4	4	2	7	6	5	5	4	3	5	2	7	5	7	4	1	2	2	2	3	3	3	4	3	4	3	3	4	3	5	4	4	4	1	3	1	1	1	1	1	3	2	2	3	3	3	1
2	26	5	6	6	4	5	5	7	7	7	6	5	4	5	6	6	7	1	1	3	1	3	1	2	1	1	1	2	2	3	3	1	1	2	3	1	1	3	4	4	4	4	3	3	3	4	4	4	4
1	20	4	5	4	4	5	3	4	3	5	6	5	6	7	4	5	7	3	4	4	3	3	3	4	2	4	3	3	3	3	3	5	5	4	4	5	4	1	1	2	2	1	2	1	1	3	2	3	4
1	22	6	6	4	5	3	3	5	3	7	5	7	7	2	4	2	1	1	3	3	2	2	3	2	3	3	4	2	2	2	2	5	4	4	4	1	3	2	3	2	3	1	1	1	1	2	1	2	4
2	22	5	3	5	4	7	4	5	5	1	3	1	4	3	3	2	2	4	3	4	5	3	5	3	4	4	5	2	3	4	2	5	5	3	4	3	4	4	4	2	2	2	2	3	2	2	3	1	3
1	20	1	1	3	2	3	3	4	4	4	3	2	3	6	6	5	4	1	3	3	3	1	2	3	1	2	1	2	1	3	3	1	2	2	3	2	2	4	3	3	4	3	4	4	4	4	4	3	3
2	23	7	7	6	5	7	5	6	6	2	4	2	3	5	5	3	4	1	2	1	3	2	2	2	2	1	1	1	2	3	1	2	2	3	2	3	3	3	2	2	2	2	4	3	4	3	4	3	2
2	22	6	5	4	4	5	6	5	5	6	6	3	3	7	6	6	6	5	4	4	4	4	2	2	4	2	4	5	5	3	5	3	4	2	4	4	3	2	3	2	3	3	3	2	3	3	2	2	2
1	23	4	4	3	4	4	3	5	2	5	5	3	3	1	3	4	2	1	3	3	1	2	5	5	4	4	4	1	3	2	1	4	5	4	3	5	5	4	4	3	3	4	1	1	2	2	2	2	4
2	26	2	3	4	4	6	3	5	6	5	3	3	4	7	6	4	5	3	3	3	2	2	5	5	3	5	3	1	3	2	2	4	3	4	5	2	2	2	3	2	2	2	4	2	3	3	3	3	4
2	22	6	4	6	6	1	4	1	4	1	3	3	2	3	4	4	3	3	4	2	4	4	1	3	3	3	2	5	5	3	5	3	4	3	2	4	3	4	4	4	3	3	2	2	1	1	2	2	3
2	20	4	5	4	4	1	2	3	4	6	6	5	6	2	3	3	4	1	2	3	3	1	1	1	2	2	1	1	2	1	1	2	2	2	1	2	3	4	4	3	3	2	3	3	3	3	3	3	2
1	20	2	1	2	4	4	3	5	3	4	5	3	5	2	4	4	4	1	2	3	2	1	1	3	3	2	2	4	3	5	4	4	4	4	3	5	5	4	3	3	3	2	1	2	2	2	1	1	4
1	22	5	6	6	5	6	5	3	5	1	2	3	2	6	4	4	3	3	4	4	4	2	4	3	5	3	4	2	3	2	4	3	3	4	4	3	2	4	3	3	4	2	3	3	2	3	2	2	4
2	22	6	5	4	5	5	3	4	5	1	3	2	3	1	2	2	3	4	4	3	4	5	3	3	4	3	3	2	2	3	2	5	4	4	5	2	2	2	1	2	3	2	4	3	2	2	3	2	4
1	25	2	3	3	2	6	4	6	4	1	3	3	3	6	5	3	4	5	4	4	5	4	1	3	2	2	1	2	3	3	2	4	4	3	3	1	3	2	2	2	2	2	2	1	2	2	2	3	3
1	23	4	3	5	3	5	3	3	3	3	2	3	3	6	5	4	6	4	5	5	3	3	2	2	2	3	3	4	4	4	3	4	3	4	4	2	2	3	2	3	2	2	2	3	1	1	1	3	4
2	20	4	3	5	4	5	4	4	5	1	1	3	2	1	2	1	2	1	2	1	1	1	2	3	3	2	3	1	2	3	3	2	1	3	2	3	3	1	1	1	2	1	2	3	1	2	1	3	1
1	23	5	5	5	6	5	5	7	7	5	7	7	4	6	6	5	5	1	1	1	2	1	2	3	2	3	2	2	3	2	2	2	1	1	2	2	2	4	3	4	4	3	3	3	4	4	3	4	4
1	20	7	5	6	4	5	6	3	4	2	2	1	4	3	5	5	2	2	3	2	1	1	2	2	1	2	3	2	2	2	2	2	2	2	2	3	3	2	2	3	2	3	3	3	2	2	3	3	1
1	24	1	1	3	4	7	4	7	6	6	6	6	6	2	3	4	1	1	3	1	3	3	5	5	4	3	4	3	4	3	4	1	2	1	2	2	3	4	4	3	3	2	1	2	2	2	2	2	2
1	21	1	4	1	3	3	2	2	4	5	3	3	6	3	5	2	2	1	1	3	3	3	1	1	3	1	2	2	3	3	3	1	1	2	1	3	1	1	2	2	2	2	4	3	2	4	3	2	1
1	26	3	2	4	5	5	6	5	5	1	2	2	1	6	3	4	4	5	4	5	4	4	1	3	2	2	3	2	3	3	3	4	3	3	4	5	5	2	2	2	1	1	4	4	3	2	3	2	4
1	25	6	3	6	4	7	5	4	4	3	2	2	5	3	4	3	2	1	1	3	2	3	5	4	3	5	3	1	2	3	3	1	3	3	2	4	3	3	3	3	3	4	3	3	4	3	4	4	4
2	24	7	7	4	5	6	5	7	7	7	5	7	7	7	6	5	4	1	1	3	1	3	2	3	1	1	3	2	3	3	3	3	3	2	3	2	2	3	4	3	4	4	4	4	3	4	3	4	4
1	26	3	4	3	5	5	6	5	4	6	4	4	6	7	4	5	6	5	3	5	3	5	2	4	4	4	4	2	2	2	4	1	2	3	1	1	3	4	2	3	2	2	2	2	2	2	2	2	4
2	24	7	7	7	6	5	5	7	6	6	4	4	4	7	5	6	6	1	2	2	2	2	2	2	4	2	3	3	3	4	3	5	4	3	4	3	2	2	2	3	1	2	1	1	2	2	2	2	3
1	22	1	2	2	3	7	4	4	4	5	4	4	6	1	3	2	3	1	2	2	2	2	2	2	1	2	2	2	3	2	3	3	1	2	3	2	2	3	3	3	2	2	3	2	3	3	2	2	1
1	22	3	2	5	4	2	2	3	2	4	4	5	5	7	6	4	7	2	3	3	4	2	4	4	3	3	3	5	4	4	4	5	4	4	4	4	4	2	3	3	2	2	2	1	2	2	2	3	1
1	21	1	3	2	2	5	6	4	5	3	4	4	5	6	5	4	6	3	3	2	3	4	5	4	4	5	3	2	4	2	3	4	3	3	4	4	4	2	1	1	3	2	2	2	2	2	2	3	4
2	23	7	7	7	6	4	4	3	4	4	2	5	3	7	4	5	4	1	2	1	2	3	2	1	1	2	3	1	3	2	3	2	1	2	1	2	2	3	2	3	2	2	2	2	2	2	2	2	3
2	19	5	5	4	3	5	4	4	3	3	2	5	3	4	3	4	3	5	3	4	3	5	1	3	2	2	3	2	2	3	2	2	3	3	4	4	4	1	1	1	1	1	2	3	2	3	2	2	1
2	20	1	2	4	2	3	2	2	3	7	5	4	5	2	4	1	4	3	3	3	4	3	4	3	3	4	4	4	5	4	5	2	2	3	2	4	4	4	4	4	3	3	4	4	4	2	3	3	2
1	24	5	3	5	5	3	4	2	4	2	3	4	3	5	3	5	3	5	3	5	3	4	3	4	4	3	3	3	4	4	4	1	1	3	3	1	1	1	2	1	2	1	3	2	2	3	3	2	4
1	22	1	1	1	2	1	3	1	1	7	4	4	6	5	5	5	3	1	1	2	3	2	3	4	4	4	3	3	3	2	4	1	3	3	3	5	5	3	3	3	2	3	1	2	1	2	2	2	4
1	25	5	4	4	5	4	4	7	7	6	7	6	7	6	7	6	4	1	1	3	3	1	1	1	1	1	2	3	1	3	3	1	3	3	2	2	2	4	4	3	3	3	4	3	3	4	4	3	3
2	23	5	7	6	6	6	7	6	6	7	4	6	4	7	6	4	6	1	1	1	3	1	2	3	2	4	2	5	3	4	4	2	4	2	2	3	4	2	2	2	3	3	3	3	2	2	3	3	4
2	26	4	4	7	5	7	7	6	6	6	6	7	6	7	7	6	5	2	2	3	2	4	2	2	3	3	4	1	1	1	3	3	4	4	3	4	3	2	1	2	1	3	4	3	3	2	2	2	2
2	20	1	3	3	1	4	3	4	5	1	1	3	4	2	4	1	4	4	3	3	3	4	2	3	2	2	3	2	2	3	3	2	2	3	4	2	3	4	4	3	4	4	3	3	4	3	3	4	3
1	22	1	2	3	3	1	1	4	2	2	4	4	3	5	3	5	5	3	3	2	3	3	5	5	5	5	4	2	3	2	2	2	2	2	2	4	4	2	1	1	1	1	1	1	2	2	2	1	2
1	21	3	4	3	5	6	4	6	5	3	2	2	2	3	3	4	2	2	2	3	2	3	2	2	3	3	1	2	2	2	2	1	2	3	2	1	3	3	3	2	2	2	3	2	2	3	2	2	1
1	23	5	3	4	3	2	4	4	2	4	2	4	4	3	2	4	4	1	1	2	2	1	4	4	3	3	3	3	3	4	4	5	5	3	3	1	2	4	3	4	3	4	3	3	4	4	4	4	3
1	23	4	4	5	3	3	3	5	3	1	1	1	2	2	4	4	4	3	4	2	4	4	1	3	1	2	1	1	2	3	2	5	5	4	4	5	5	1	1	1	2	2	1	2	1	2	2	1	1
1	19	1	1	2	2	6	5	3	6	6	5	5	4	2	2	3	2	2	3	2	2	1	2	2	3	3	1	2	1	2	3	1	2	2	2	2	3	3	3	2	2	3	4	4	3	2	3	3	3
1	24	5	6	7	5	5	7	6	6	6	5	6	4	4	4	5	4	1	3	3	3	3	2	3	4	4	2	5	5	5	4	2	4	2	3	3	3	1	1	1	2	2	4	2	3	2	3	4	3
1	22	6	5	4	6	5	4	5	3	5	4	3	6	1	2	3	3	5	3	5	5	4	1	3	1	3	3	2	2	3	3	3	4	2	3	3	3	3	2	2	3	3	3	3	3	3	2	3	4
2	20	6	6	3	4	6	4	6	3	4	4	4	4	5	4	5	4	1	2	2	3	3	1	3	1	2	2	3	2	3	4	4	4	3	3	4	3	3	2	2	3	2	4	3	3	2	3	3	3
1	21	4	5	5	5	6	5	6	5	1	3	1	3	6	4	3	4	4	3	3	3	4	2	2	2	3	2	5	4	5	3	4	5	3	3	4	3	1	1	1	2	2	4	3	2	2	3	3	4
1	24	1	3	3	2	3	3	3	2	5	4	5	6	1	4	2	1	3	4	3	4	4	1	3	3	3	2	4	5	4	3	1	2	1	3	2	2	2	3	3	1	1	1	2	2	2	2	2	2
1	20	6	5	6	4	4	2	5	5	5	6	4	3	2	1	3	1	3	4	3	4	4	1	3	1	3	2	1	3	3	3	1	2	2	2	2	3	4	3	3	3	4	4	3	3	4	3	4	4
1	20	5	3	6	4	7	6	5	7	3	4	4	2	6	5	6	4	2	2	3	2	2	4	5	5	3	5	1	3	2	1	3	4	2	2	1	3	1	2	2	1	2	2	2	3	2	3	2	4
1	22	6	4	4	6	2	4	1	4	4	5	4	5	2	2	2	1	3	4	3	3	4	2	3	3	3	2	3	3	4	3	5	3	4	4	1	1	3	2	2	3	2	4	4	3	3	2	4	2
2	21	7	6	6	5	5	4	6	5	5	5	6	6	5	6	5	6	2	2	1	3	2	1	3	2	1	1	1	1	3	3	3	1	1	1	1	3	4	4	3	3	3	4	4	4	3	4	3	3
1	24	6	5	3	3	1	4	4	4	5	4	3	6	2	1	2	4	5	3	4	5	3	5	5	5	4	4	3	4	4	4	2	3	3	2	1	2	3	3	3	2	3	1	2	1	2	2	1	3
1	21	6	4	4	6	3	5	3	2	6	3	6	6	1	2	3	2	3	3	4	3	3	1	2	3	2	1	1	2	2	2	4	4	4	3	4	5	1	2	2	1	1	3	2	2	2	3	3	3
2	20	4	4	5	7	5	5	7	6	6	4	6	5	5	6	6	4	5	4	3	5	4	1	2	1	1	2	3	3	4	4	2	3	2	2	3	3	4	3	3	3	2	2	2	1	3	2	2	4
1	22	7	7	7	6	4	7	4	6	5	6	7	7	6	6	6	5	2	1	2	2	1	2	3	1	3	3	2	1	2	2	2	2	3	1	3	2	3	3	4	3	4	4	3	3	3	4	4	4
1	24	7	7	5	7	5	7	4	5	4	6	5	5	7	5	5	5	3	4	3	3	3	5	5	4	4	4	2	4	2	2	1	3	2	1	2	2	3	4	3	3	3	4	3	4	4	3	3	4
1	19	5	6	5	7	6	5	5	6	7	5	5	6	6	7	6	7	1	2	3	1	3	3	3	3	3	2	4	4	4	3	1	2	1	2	4	4	3	3	2	2	2	1	1	1	2	2	2	3
1	25	6	4	4	6	7	4	5	4	3	3	2	2	6	6	6	5	2	3	2	2	3	3	1	3	1	2	1	3	3	3	2	3	2	1	2	3	4	4	3	2	3	1	2	1	2	1	2	3
1	23	2	1	3	1	2	3	3	3	7	4	6	7	6	6	4	6	1	3	3	1	3	3	3	3	3	3	1	2	3	2	2	2	3	1	1	3	1	1	2	2	1	3	3	3	2	3	3	1
1	22	7	5	4	7	7	6	5	5	5	3	4	5	1	1	3	4	4	3	3	3	5	5	3	5	5	4	4	3	4	3	5	5	4	4	2	2	1	2	1	2	1	4	3	4	4	3	2	3
1	22	5	4	3	3	5	5	5	6	3	5	2	2	4	2	4	3	5	5	3	5	4	1	3	3	3	2	4	3	3	4	1	3	3	2	4	4	4	4	3	3	4	3	3	4	3	3	4	3
2	20	1	1	1	4	6	5	3	4	2	3	4	3	6	6	6	4	4	3	4	3	3	1	2	3	2	3	2	2	2	3	3	2	4	4	2	2	2	1	1	2	2	1	1	1	1	1	1	3
2	26	3	5	3	3	5	5	4	5	2	2	1	4	4	2	4	3	3	2	3	3	2	4	3	5	5	4	2	3	4	3	3	3	4	4	5	4	3	3	3	3	2	2	2	2	1	2	3	2
2	25	7	4	4	6	7	6	5	6	5	6	4	4	5	5	5	4	2	4	2	3	2	5	4	5	4	5	4	5	5	4	3	2	2	3	1	3	4	4	3	2	3	2	1	2	3	2	2	3
1	25	1	3	2	2	7	4	4	5	2	4	1	2	6	5	6	4	1	2	2	3	2	2	2	3	1	1	3	1	1	3	1	3	3	2	1	1	4	2	3	4	3	3	2	2	2	3	3	3
1	22	5	5	4	7	4	4	6	4	7	6	6	7	5	5	6	7	2	2	3	3	2	2	3	3	1	1	1	3	3	3	3	3	1	3	2	3	3	3	3	4	3	3	4	4	4	4	4	4
1	19	3	5	4	2	6	4	5	6	1	3	2	2	2	4	4	3	1	3	3	1	3	5	4	5	3	3	2	2	2	3	3	3	2	4	2	4	1	2	2	2	2	2	2	2	2	2	2	4
2	24	5	5	3	4	2	4	3	3	2	3	2	2	2	1	4	3	5	4	4	4	4	2	4	2	3	2	4	4	4	5	4	3	3	4	4	4	2	3	2	2	3	4	2	3	4	4	4	3
2	21	2	2	3	4	6	4	5	4	5	4	4	4	6	6	6	5	1	2	2	2	2	2	4	3	2	3	4	5	5	3	5	4	4	3	1	1	2	3	1	2	2	1	1	2	2	1	1	4
2	20	7	6	4	6	3	2	3	4	6	5	5	3	2	3	3	3	2	3	2	3	3	4	3	3	3	5	1	1	2	1	3	4	3	3	2	3	2	2	3	1	3	1	1	2	2	2	1	2
1	23	1	2	3	2	6	5	6	4	2	2	2	3	7	5	6	4	2	3	4	4	3	2	3	3	2	2	3	4	2	2	2	2	2	2	2	2	4	3	4	2	3	4	4	3	4	4	4	4
2	20	6	7	7	6	7	6	7	6	4	7	7	4	7	7	4	4	2	3	1	2	1	2	2	1	2	1	3	2	3	1	3	1	3	1	1	1	4	4	3	3	3	4	4	3	3	4	3	4
2	23	5	6	3	3	6	4	5	5	7	4	6	7	5	3	4	3	1	3	1	2	2	3	1	3	1	2	1	2	2	3	1	2	2	1	2	2	2	2	2	3	2	3	3	3	2	2	2	4
1	25	5	5	4	5	6	6	6	5	5	6	4	5	7	4	6	4	1	3	2	3	3	4	3	5	3	3	4	5	5	3	1	1	1	2	3	4	4	4	3	3	4	2	3	2	2	2	3	2
1	22	6	4	4	4	4	3	4	2	1	4	4	3	2	3	4	3	3	3	1	1	3	3	3	1	3	3	2	3	3	2	1	2	1	2	2	2	3	3	4	4	3	4	4	4	3	4	3	3
1	22	4	3	3	5	1	1	3	3	1	1	4	3	2	3	3	2	2	3	3	3	3	3	4	2	3	4	3	4	4	3	3	4	3	4	1	3	4	3	2	3	3	4	3	2	2	4	4	2
1	22	4	2	3	2	7	6	7	4	3	3	4	2	5	3	5	3	4	4	4	5	3	4	3	3	3	4	1	3	2	3	3	4	4	3	4	5	4	3	3	3	2	1	1	1	2	1	2	3
1	22	6	3	3	6	3	2	2	5	4	3	2	5	2	4	3	2	2	4	2	2	2	5	5	5	5	4	4	3	4	3	1	3	2	2	2	4	4	4	3	3	2	3	2	2	2	2	2	4
1	20	7	7	6	6	5	4	4	7	5	5	7	7	7	7	4	7	4	4	3	3	4	3	2	4	4	2	2	2	2	2	4	3	4	3	5	5	4	2	3	3	2	2	2	1	3	2	3	2
1	23	1	1	4	3	2	2	2	3	7	7	6	4	6	5	5	6	2	2	3	2	3	1	3	3	1	2	2	4	4	3	2	2	4	2	3	2	4	3	3	2	2	4	3	3	4	4	3	2
1	23	2	2	1	1	1	1	3	2	6	4	3	5	2	4	4	4	5	4	3	5	3	2	4	4	2	4	2	4	2	3	4	3	3	5	1	2	3	3	3	3	2	2	2	3	2	2	3	2
1	26	7	4	5	4	7	6	4	4	2	3	4	3	2	4	3	4	1	2	3	3	3	3	1	1	2	1	2	1	1	2	3	1	3	3	1	2	2	3	3	2	3	4	3	3	3	3	3	4
1	27	3	3	4	3	2	1	4	4	2	2	4	1	7	7	4	5	5	5	4	5	3	4	4	4	3	4	4	3	3	4	4	3	5	3	2	2	3	2	3	2	2	4	2	4	4	3	4	2
1	18	7	5	4	4	1	1	2	3	2	3	4	3	2	4	3	3	3	2	2	3	3	3	4	3	2	4	3	2	3	3	3	3	3	3	2	3	3	3	4	4	3	3	3	4	3	4	4	4
1	23	7	5	6	6	4	5	3	3	3	3	4	5	5	5	4	4	3	2	3	3	4	2	3	3	2	2	4	4	5	3	2	2	2	2	5	5	4	3	4	3	4	3	3	3	3	4	3	3
1	21	6	4	7	6	7	6	7	5	5	4	7	7	6	7	4	7	2	2	2	4	4	4	4	3	3	3	1	3	2	1	2	3	3	2	5	4	1	1	1	1	1	1	1	2	2	1	1	1
1	24	3	5	2	4	5	5	5	4	5	3	3	6	3	2	2	2	2	3	2	3	2	3	3	3	3	3	2	3	2	2	5	5	3	4	2	3	4	3	3	4	3	1	2	2	1	1	1	3
1	22	4	3	4	3	5	3	5	4	7	6	4	4	6	4	5	4	3	4	2	4	4	4	3	4	3	4	4	3	3	3	5	5	5	4	4	4	4	3	3	3	3	3	3	3	3	3	2	3
1	22	6	5	6	4	3	2	3	4	5	5	5	6	7	5	7	5	4	5	5	4	3	1	2	3	3	3	2	3	3	4	2	4	4	3	1	1	2	3	3	1	2	1	1	2	1	1	2	2
1	23	2	3	2	2	4	5	3	4	5	6	3	4	3	3	3	4	4	3	3	3	4	4	4	4	4	3	4	5	4	5	1	2	2	3	1	2	3	2	3	2	3	4	3	2	2	3	2	3
1	24	2	2	1	1	4	3	5	3	4	4	5	3	6	5	4	3	4	4	3	5	5	4	4	4	4	4	3	4	4	4	4	5	3	3	4	3	3	2	3	2	3	4	3	3	4	2	3	1
1	23	5	3	3	3	2	3	2	4	5	3	3	5	6	3	4	5	2	2	2	2	3	5	5	5	3	4	3	2	4	3	4	4	3	5	2	3	1	2	2	2	2	1	1	2	1	1	1	3
1	22	5	5	3	3	5	3	4	4	4	5	2	5	5	3	6	4	2	2	4	3	2	2	2	2	3	4	5	4	3	5	4	4	3	3	3	3	1	1	2	2	1	1	1	1	2	1	1	1
2	22	6	5	5	5	5	5	4	3	3	3	2	4	3	3	2	3	4	4	3	3	3	3	2	3	3	3	5	5	5	3	4	4	3	3	3	3	4	4	3	2	3	3	2	2	2	3	2	3
2	22	6	5	3	4	3	3	5	3	6	3	5	6	4	3	5	4	4	5	3	4	5	2	3	2	3	2	4	5	5	4	5	4	4	4	1	2	2	1	1	2	2	2	2	2	3	2	3	1
2	22	2	1	3	2	2	3	2	4	4	2	5	4	5	4	5	3	5	5	4	4	5	5	3	4	4	4	5	4	5	4	5	4	4	4	3	3	1	2	1	2	2	4	3	3	4	3	3	4
1	26	1	2	2	1	5	3	4	4	6	5	3	5	4	4	5	2	4	4	3	5	3	4	3	3	4	3	4	5	3	5	5	4	5	5	2	4	1	2	2	1	2	4	2	2	3	3	2	3
2	22	7	6	4	6	3	2	4	4	7	7	4	4	3	5	4	4	2	3	1	1	2	1	1	2	3	3	2	2	2	1	2	1	2	1	1	3	2	1	1	1	3	1	1	2	1	2	2	3
1	24	2	1	3	2	1	1	2	1	4	3	5	4	1	1	2	4	4	4	4	4	3	1	3	1	2	3	4	4	4	5	5	4	4	4	1	2	4	3	4	3	4	4	2	4	3	2	4	4
2	20	2	2	2	3	7	4	4	4	2	2	2	2	4	4	3	4	2	3	3	3	3	5	4	5	3	4	2	2	3	2	4	4	4	4	2	3	1	2	2	1	1	1	1	1	2	2	1	3
1	22	6	6	4	5	2	2	3	4	3	3	4	2	7	5	5	4	3	3	2	4	4	4	3	3	3	4	2	3	3	4	3	4	2	4	5	5	4	3	4	3	4	3	3	3	2	3	2	3
2	22	7	4	6	7	2	4	4	1	3	4	3	4	2	4	2	4	5	3	4	3	5	2	3	4	4	2	4	4	4	3	5	5	3	5	1	2	3	3	2	3	2	3	2	3	2	3	3	1
1	20	5	4	4	3	3	4	3	2	6	6	4	4	4	4	5	3	3	3	3	4	4	1	3	3	2	2	1	2	2	1	2	3	4	2	2	3	4	4	3	3	2	1	1	1	2	2	1	3
2	22	6	4	6	4	3	4	2	2	3	2	2	2	7	7	7	4	3	3	3	2	4	3	3	2	3	3	3	4	3	2	5	5	3	5	1	3	4	3	4	3	3	4	3	3	4	4	3	3
2	22	3	2	2	2	1	2	2	2	5	4	4	6	4	3	4	5	2	2	2	3	1	2	1	1	3	1	2	3	1	1	1	3	2	1	2	2	1	2	1	2	1	3	3	3	3	2	2	3
1	21	7	5	5	6	7	5	7	5	5	7	5	6	4	7	4	5	3	4	2	4	3	1	1	1	2	3	3	2	3	3	4	3	3	4	2	4	3	3	4	3	3	3	3	3	3	3	3	3
1	22	7	6	6	6	1	4	4	3	6	5	4	4	4	3	3	2	3	2	4	3	4	5	4	3	5	5	3	4	4	3	3	4	3	4	1	2	4	3	2	3	2	4	3	2	3	3	2	1
2	22	2	2	3	4	4	3	5	5	2	3	1	3	6	5	6	4	3	3	2	3	2	1	1	3	1	3	1	3	3	3	5	4	5	3	5	5	2	2	2	3	2	3	3	2	3	2	3	1
1	20	5	6	3	3	5	3	4	4	7	6	4	7	3	2	5	3	1	3	3	1	2	4	3	5	4	3	2	3	3	2	2	4	2	3	3	4	3	3	2	2	3	1	1	1	2	1	2	2
1	20	4	4	4	2	5	4	3	3	5	3	4	5	7	4	6	4	1	2	2	1	2	4	5	3	3	4	2	2	4	4	4	4	4	4	4	3	3	2	2	3	2	4	2	2	3	3	2	1
2	26	3	2	5	2	1	2	2	1	5	5	3	3	6	6	5	6	3	2	4	3	4	4	4	3	3	3	1	3	1	2	2	2	3	2	1	3	2	1	2	1	1	1	1	2	2	1	1	2
2	22	5	4	4	4	5	5	7	6	7	4	7	6	5	4	5	6	1	1	3	1	3	3	2	1	3	1	1	2	3	3	3	1	2	3	3	1	4	3	4	4	3	3	4	3	3	3	3	3
2	25	4	4	4	4	7	6	7	5	6	6	5	5	4	5	3	4	4	3	3	4	3	5	5	4	4	4	4	3	4	4	5	4	5	5	2	3	4	3	3	2	4	3	2	3	2	3	2	1
2	21	4	3	4	5	5	4	5	6	7	6	6	4	6	4	4	5	1	2	2	3	2	1	1	2	3	2	3	3	4	2	3	3	3	4	3	4	1	2	1	2	2	4	3	2	2	4	3	3
2	20	4	4	3	2	3	4	3	3	1	1	2	1	6	4	4	6	1	2	3	3	2	1	2	1	2	1	2	2	2	3	2	2	2	3	2	1	1	2	2	2	2	3	3	3	2	2	2	2
1	19	3	3	4	3	4	5	5	4	2	2	2	2	1	2	3	2	4	4	4	3	3	3	3	3	2	3	4	4	3	4	2	4	3	2	5	4	4	3	2	2	3	4	4	3	3	2	4	3
1	22	3	2	5	2	3	2	4	3	2	4	4	2	3	4	5	4	5	4	5	5	5	2	2	2	2	2	3	4	4	3	5	4	4	4	2	3	4	4	3	3	3	4	4	3	3	3	4	3
1	27	6	6	6	4	3	3	4	4	4	4	3	2	6	3	6	5	2	3	2	2	2	1	2	3	3	2	1	1	3	1	3	2	1	3	3	1	3	2	2	2	3	2	1	1	2	3	1	1
1	20	6	6	3	5	1	3	2	2	3	3	4	3	2	2	1	3	5	3	3	3	5	5	4	4	4	5	3	3	3	3	1	2	2	3	5	3	4	2	3	3	3	4	4	2	3	4	3	1
1	24	1	2	2	2	4	5	3	5	6	5	3	4	6	5	6	5	2	3	4	4	3	4	3	5	3	5	5	4	4	4	5	4	4	5	2	3	2	1	2	1	2	1	2	1	1	2	2	2
2	20	5	5	5	3	3	5	3	2	1	2	2	1	2	1	4	2	3	3	3	3	3	2	4	2	2	2	4	3	3	3	4	3	3	3	5	4	4	4	2	2	3	2	1	2	1	1	2	2
1	23	7	6	6	6	2	2	2	4	7	7	5	4	4	4	5	4	4	5	3	3	3	5	4	4	4	4	1	2	3	1	2	3	4	2	1	3	3	3	2	2	3	3	2	2	3	2	2	1
1	22	6	5	4	4	6	4	5	6	7	5	4	4	6	3	6	6	4	4	4	5	4	4	3	4	3	5	4	4	5	4	1	3	3	3	2	2	2	3	2	3	3	2	1	1	3	2	2	2
2	23	4	3	2	5	4	2	5	5	3	3	2	5	5	3	4	4	4	4	5	4	3	2	2	2	4	2	4	5	4	4	1	2	2	2	2	2	1	1	1	2	2	2	2	1	2	3	1	4
2	22	1	1	1	3	7	4	5	4	3	2	3	3	6	6	6	4	3	4	4	4	3	3	3	4	3	2	1	1	2	3	3	3	2	3	3	4	3	3	3	3	3	3	3	2	2	2	3	3
2	24	4	5	5	4	1	2	1	3	1	2	3	2	1	3	3	2	1	3	2	3	2	1	2	2	3	1	4	3	4	5	2	2	3	2	4	5	4	3	3	3	3	4	3	4	4	3	3	4
1	18	5	3	3	5	6	4	5	6	2	4	3	4	5	3	3	5	2	1	1	2	2	1	1	3	1	2	2	3	3	3	3	1	1	3	3	3	3	3	2	2	2	4	2	3	2	4	2	2
1	20	4	3	4	4	6	3	4	5	5	4	5	3	7	6	7	4	3	3	3	3	3	3	4	3	3	4	3	3	3	4	3	3	4	3	1	2	4	3	4	4	4	2	3	2	2	2	2	4
1	21	3	4	3	4	7	4	5	5	3	4	3	4	3	3	2	4	1	2	2	3	1	2	2	4	3	3	4	4	3	4	1	3	1	2	3	3	2	2	3	2	3	3	3	3	2	3	2	4
2	24	1	3	3	2	5	4	5	5	2	1	4	4	5	4	3	4	2	2	2	1	3	3	3	1	3	1	1	1	3	2	2	2	3	1	1	1	2	2	3	1	2	3	3	2	2	2	2	2
1	23	7	6	7	7	5	4	6	6	4	5	7	4	5	5	7	7	2	2	3	2	2	2	2	3	1	2	2	2	2	3	2	3	1	2	3	3	3	3	4	4	4	3	4	3	3	3	3	4
1	24	6	5	5	5	5	5	6	7	5	4	5	7	7	4	5	6	1	3	1	3	1	2	2	2	3	2	3	1	1	1	2	3	3	2	3	3	3	2	3	2	2	2	2	2	2	1	2	2
1	23	2	2	3	3	1	3	2	2	1	2	4	3	1	4	3	2	2	2	2	3	2	3	3	3	3	4	3	4	3	3	5	5	4	4	2	2	3	2	2	3	2	3	3	2	3	3	2	1
2	22	2	3	1	4	6	5	3	4	6	5	6	5	1	1	3	3	4	5	4	4	3	2	3	3	3	2	2	2	4	2	2	3	2	3	4	5	4	3	2	2	4	3	2	2	2	2	2	4
1	22	7	7	5	6	5	5	5	6	5	5	6	4	7	4	5	6	2	2	3	4	2	2	3	4	4	3	2	3	2	2	4	3	5	4	3	4	3	2	2	2	2	3	2	3	3	2	3	2
1	22	1	2	3	3	7	5	6	6	1	4	1	1	7	5	6	7	3	4	3	4	2	2	3	3	2	2	3	3	4	3	4	3	4	4	3	3	3	2	2	3	2	2	2	3	1	2	2	2
2	19	5	4	5	3	2	1	1	4	3	4	5	2	3	2	4	2	5	5	5	5	5	5	5	5	5	5	2	2	2	3	3	3	2	4	3	4	2	2	2	2	3	3	3	2	2	2	3	4
1	23	6	4	5	4	4	3	3	3	6	3	4	5	1	2	3	2	5	5	4	3	4	3	4	2	3	4	5	4	3	3	1	2	2	3	4	4	4	4	4	4	3	3	3	3	3	2	2	3
1	23	5	4	6	6	7	6	4	6	4	4	4	5	7	5	7	6	2	3	2	3	3	3	3	3	3	2	4	4	5	5	1	2	3	2	5	5	4	4	3	4	4	3	3	3	3	4	3	4
1	23	7	5	7	5	5	4	7	7	6	6	6	6	5	5	5	5	1	1	3	1	3	2	1	2	2	2	3	1	3	1	2	3	2	2	2	2	3	2	2	3	3	1	1	1	2	2	1	4
1	22	1	3	3	3	6	5	6	5	4	4	4	3	4	3	5	3	2	3	2	1	1	1	3	1	1	3	2	2	2	3	2	2	3	1	3	3	2	3	2	2	3	1	2	1	2	1	1	3
2	26	6	4	4	4	6	5	6	7	6	4	4	6	7	4	7	4	1	1	2	3	1	1	1	3	1	2	2	1	1	2	3	3	2	1	3	1	3	4	4	3	4	3	3	3	3	3	4	3
2	26	3	4	4	3	3	2	3	4	6	3	6	4	4	3	5	4	3	3	3	2	2	4	3	4	3	3	3	3	3	4	4	3	4	4	1	3	3	2	3	2	3	2	2	1	1	2	3	3
1	22	2	1	2	2	2	2	3	2	5	6	3	5	6	4	5	5	2	4	4	4	2	3	2	3	4	4	5	4	5	3	2	3	4	2	3	4	1	1	1	2	1	1	1	1	1	1	2	1
1	25	1	4	2	4	2	3	4	4	6	5	5	3	3	2	2	2	4	4	3	4	4	2	2	2	3	3	1	3	2	2	3	3	4	3	2	4	4	3	4	4	4	3	4	4	4	4	3	3
2	23	5	3	5	4	2	4	3	4	6	4	6	6	1	2	1	3	3	4	4	3	4	4	4	4	3	4	4	3	4	3	1	2	1	2	3	2	2	3	2	2	3	3	3	3	3	3	3	4
1	25	4	6	7	6	4	5	6	4	5	6	5	7	7	7	5	7	2	1	2	2	3	1	1	2	3	1	2	3	2	3	1	2	2	2	1	2	1	2	2	1	2	2	1	2	3	2	3	3
2	26	5	3	4	6	7	4	7	6	2	3	2	3	2	1	2	2	4	3	3	4	3	1	3	3	2	3	5	4	4	3	3	3	4	4	2	2	2	3	2	2	2	1	1	2	1	2	1	2
2	22	7	7	5	7	3	2	4	3	6	6	6	5	1	2	2	3	3	4	3	3	3	3	4	3	3	4	3	4	2	3	3	4	3	3	1	2	4	3	2	3	3	2	1	2	2	2	2	2
2	22	5	5	4	6	5	5	5	3	3	2	2	2	5	3	4	6	5	3	5	5	4	5	5	4	4	5	2	2	2	2	1	3	3	3	2	4	2	1	3	1	3	1	2	2	2	2	2	2
1	21	3	4	3	2	5	6	6	4	3	4	5	2	4	4	3	5	1	1	2	2	3	3	4	4	3	4	2	2	2	4	4	4	3	3	2	3	3	2	2	2	3	1	2	2	2	1	2	1
2	20	6	4	5	4	7	5	5	6	2	4	2	4	7	5	4	5	4	3	4	4	3	1	3	1	2	3	3	4	4	3	1	1	3	3	3	3	2	2	2	3	3	3	3	3	2	2	2	1
2	22	4	6	7	4	5	7	4	4	5	6	6	6	7	5	7	6	1	3	3	3	3	3	1	3	1	1	2	1	2	1	2	1	1	3	1	1	4	3	3	3	4	4	4	4	4	4	4	4
1	24	6	4	5	6	4	2	4	3	7	4	6	4	5	4	3	3	4	3	5	5	4	3	3	2	4	3	5	4	4	4	5	4	5	5	3	4	3	2	3	3	2	1	2	1	2	2	2	2
1	26	4	2	3	4	1	3	2	2	2	4	4	4	2	2	4	2	3	4	4	3	4	1	3	2	3	2	1	2	2	3	4	3	5	5	2	2	1	2	2	1	2	1	2	2	1	2	1	3
1	19	1	1	1	3	1	4	1	1	2	3	4	4	5	6	5	3	5	3	3	4	4	5	5	3	5	4	5	3	4	4	4	4	5	3	3	2	4	4	3	2	2	4	4	3	3	4	3	2
2	19	5	3	3	4	3	4	2	3	4	4	4	4	1	3	1	2	3	2	2	3	3	4	3	4	3	3	2	2	3	4	5	4	4	4	4	3	2	1	2	1	1	3	3	3	2	3	3	2
1	24	2	3	4	4	3	4	5	3	7	4	4	5	4	2	5	3	2	3	4	4	3	3	3	4	3	3	5	4	5	5	5	5	4	5	4	4	2	1	2	1	3	3	3	3	3	2	2	2
1	25	5	5	5	4	6	4	6	6	5	7	5	5	7	6	4	5	3	4	3	4	4	1	1	3	2	2	1	2	2	2	3	3	2	2	1	3	3	2	3	3	3	2	1	1	1	3	2	2
2	21	3	3	4	3	5	5	4	4	5	3	5	6	1	3	2	2	2	2	1	1	2	1	3	2	1	3	1	2	3	3	1	3	2	3	1	2	2	2	1	3	2	1	2	1	1	2	1	3
1	23	3	2	4	2	5	3	4	4	5	3	5	4	5	3	5	5	4	3	4	3	3	5	5	4	5	4	1	3	3	2	5	5	3	3	2	2	4	3	3	3	3	1	2	1	2	1	1	3
1	23	2	4	4	1	4	3	3	4	7	5	5	4	5	5	3	5	4	4	4	3	3	5	5	5	5	5	4	3	3	3	3	2	4	3	3	4	3	2	3	3	2	1	2	1	1	1	1	1
1	24	4	4	4	5	6	6	4	6	3	2	3	2	5	3	3	4	2	1	3	2	1	1	2	1	2	1	1	2	1	1	2	2	2	2	1	2	3	3	3	3	3	3	3	3	4	4	3	4
1	25	6	7	6	6	5	6	6	6	4	5	5	6	5	4	6	4	1	3	3	2	2	2	2	2	2	2	1	2	3	3	1	3	1	2	3	3	3	4	4	3	3	3	4	3	3	4	4	3
1	22	1	3	3	4	4	3	3	4	1	1	2	2	2	4	2	4	2	3	3	3	4	4	3	5	3	5	5	4	4	5	4	4	4	5	2	3	3	2	3	3	3	2	3	2	2	3	2	2
2	22	6	4	6	5	5	7	4	4	7	4	4	4	5	5	5	7	3	2	4	4	3	5	5	4	5	4	1	2	3	3	2	3	2	2	4	5	4	3	3	4	4	4	3	3	4	3	4	4
2	24	6	6	5	5	6	6	4	5	7	7	6	4	7	5	7	4	1	1	3	3	2	4	5	4	4	4	4	4	4	5	4	3	3	3	3	2	3	3	2	2	3	2	3	2	3	1	2	1
2	22	3	2	4	2	1	1	2	1	3	4	3	2	5	5	5	3	2	2	2	2	3	1	1	3	1	3	1	2	3	2	3	2	1	3	3	1	1	2	2	2	1	1	2	1	1	1	1	2
2	19	4	3	4	5	5	3	3	6	3	2	3	4	2	4	1	2	2	4	4	3	2	3	3	4	4	2	4	4	3	4	3	2	4	4	3	3	1	1	2	2	2	2	2	3	2	3	2	1
2	26	5	3	3	5	1	4	1	4	2	1	2	4	6	6	4	6	1	2	3	3	3	5	4	3	5	5	4	3	3	3	2	4	4	2	1	2	2	3	2	3	2	1	1	1	2	1	2	1
2	23	5	5	3	5	3	3	2	3	3	2	2	4	7	7	5	4	2	1	2	1	2	3	3	1	3	3	2	3	2	3	1	2	1	3	2	3	2	2	3	3	3	1	2	2	1	1	2	3
1	22	3	4	2	3	4	5	2	4	2	4	1	1	4	2	3	5	2	2	2	3	2	2	2	4	3	3	1	1	2	2	4	4	5	3	3	4	2	1	3	2	1	2	2	2	2	1	2	2
2	22	3	5	3	2	3	2	3	2	4	3	4	4	3	5	4	4	2	2	3	2	4	4	3	3	3	3	5	5	4	5	2	3	3	2	4	5	1	1	1	2	2	2	3	1	1	2	1	1
1	21	5	6	5	5	4	3	3	2	5	4	3	6	4	5	5	3	5	3	3	5	5	2	4	3	2	3	2	4	2	3	3	3	2	3	4	3	1	2	2	2	1	2	3	1	2	2	3	3
1	25	7	4	7	6	2	4	3	2	4	4	3	4	4	3	5	3	3	2	4	4	4	4	5	3	5	4	2	3	3	3	2	3	2	3	1	3	1	2	1	1	1	4	2	3	3	2	2	3
1	23	5	6	5	5	5	4	6	5	5	7	5	4	7	6	4	7	2	3	2	2	2	3	4	3	3	4	5	4	3	5	2	2	2	2	4	4	2	1	2	2	2	2	1	2	2	2	1	4
2	21	2	3	2	3	3	3	3	3	6	3	4	5	6	4	4	5	2	2	2	2	4	4	3	4	3	3	5	4	4	5	1	2	2	2	2	2	3	3	3	2	3	4	3	4	2	3	3	2
2	22	7	7	6	5	6	5	5	5	6	7	7	5	7	7	5	4	2	2	2	1	1	1	1	1	3	3	2	1	1	2	2	1	2	1	1	3	3	4	3	3	3	3	4	4	4	3	3	3
2	22	5	4	4	5	1	3	1	1	6	5	4	3	3	4	2	4	2	2	4	4	3	3	2	4	3	2	5	4	4	4	5	4	5	5	2	2	3	2	2	3	2	2	2	2	2	2	2	2
2	20	6	4	6	7	6	7	5	6	4	6	7	5	5	7	6	6	3	2	3	1	1	3	1	3	2	2	1	2	2	1	1	2	3	1	2	2	4	4	3	4	3	3	4	3	3	4	4	3
1	21	5	5	5	6	7	6	4	6	6	4	5	6	5	7	5	4	1	1	2	3	3	1	1	2	2	3	4	5	4	4	3	4	4	3	3	4	4	3	3	4	4	4	3	4	3	3	3	4
2	21	6	7	6	6	7	6	5	7	7	4	4	6	5	4	5	5	3	3	1	1	1	2	2	1	3	1	2	3	1	2	2	1	3	2	2	3	3	3	3	3	3	3	3	4	3	3	4	4
1	22	6	4	4	7	6	6	5	4	7	6	4	4	5	5	5	5	5	4	3	5	5	5	4	5	4	4	5	3	3	3	2	2	2	3	4	3	4	2	2	3	2	3	3	3	2	3	2	1
1	20	5	7	6	7	6	7	4	5	7	6	5	6	7	4	5	6	1	1	2	3	3	3	3	4	4	3	3	3	4	2	2	3	3	3	1	2	4	3	4	3	4	3	3	3	2	3	2	4
1	20	5	4	4	5	7	5	7	6	3	3	5	5	6	4	6	4	2	3	4	2	3	2	2	3	4	3	3	4	4	4	1	1	1	2	3	3	4	3	4	3	3	3	3	4	4	3	3	4
1	22	3	4	2	3	2	4	3	2	7	5	5	7	4	3	4	4	1	1	1	3	2	1	1	2	3	3	2	1	1	2	3	2	1	1	2	3	4	2	2	4	3	4	3	3	4	3	2	4
1	23	7	6	4	4	7	6	7	4	5	5	5	5	3	4	3	2	1	3	3	2	2	1	3	1	2	3	2	3	3	3	1	1	2	1	2	1	4	3	4	2	3	3	2	2	2	3	3	3
1	22	1	1	2	2	1	4	3	3	1	3	1	2	2	4	3	3	3	3	2	1	3	3	2	3	1	3	2	1	2	2	2	3	2	3	3	1	3	2	2	3	3	2	2	2	1	2	2	3
1	21	7	7	6	6	5	3	3	6	1	1	3	4	5	3	6	3	1	3	2	3	3	1	3	3	2	2	3	2	3	4	2	3	2	2	4	4	3	3	2	2	2	2	2	2	2	2	2	4
2	20	2	2	3	4	4	4	4	4	5	3	4	3	2	2	4	4	3	4	2	4	3	4	4	3	3	4	1	3	3	3	4	3	5	3	1	2	4	2	4	3	3	1	2	1	1	1	2	3
1	22	4	4	4	5	3	4	4	3	4	5	3	4	1	3	1	3	2	2	3	3	3	1	3	3	3	1	2	3	3	1	1	2	2	2	1	1	4	3	3	3	4	1	1	2	2	2	2	3
1	23	6	5	6	4	4	5	2	5	6	6	5	6	2	4	1	2	3	3	4	4	2	2	3	2	2	4	3	4	4	4	3	4	3	4	1	3	3	2	3	3	3	3	2	2	3	3	3	4
1	22	6	4	5	5	4	5	7	4	7	4	5	7	5	7	6	6	2	2	3	3	1	3	1	3	2	1	1	3	2	1	2	2	1	2	3	3	4	3	4	4	4	3	3	3	3	3	4	4
2	20	3	4	4	2	4	5	2	3	3	2	3	5	4	3	4	5	4	3	5	4	3	3	3	4	3	3	2	3	2	3	1	3	3	1	3	4	3	2	3	2	2	3	3	2	2	3	2	2
2	23	4	5	5	2	1	3	2	3	4	4	5	5	4	3	3	4	3	4	3	3	4	2	2	3	2	4	1	3	2	3	4	4	4	5	1	2	3	3	2	3	3	4	2	3	3	4	3	3
2	24	6	5	6	5	6	4	4	5	7	6	4	6	5	4	7	4	1	3	1	3	3	1	2	2	2	2	2	2	1	3	1	3	1	2	3	3	3	4	4	4	3	4	4	3	4	3	4	3
1	20	5	5	5	5	6	7	4	4	6	6	7	6	7	4	4	6	2	2	2	4	4	2	3	2	3	4	4	3	3	4	2	2	2	3	5	3	2	3	2	2	1	2	2	3	2	2	3	4
2	20	2	2	4	3	4	3	3	3	2	3	4	4	1	2	3	1	2	3	2	3	3	3	4	2	2	4	4	5	4	4	1	3	2	2	2	3	1	1	2	1	1	2	2	2	3	1	2	4
1	24	7	5	4	7	5	7	7	6	7	7	4	6	4	6	7	6	1	2	1	2	3	3	1	1	2	1	1	2	1	2	1	2	2	1	2	2	4	3	4	3	4	4	4	4	3	4	4	4
1	21	5	5	4	3	2	3	1	2	5	6	4	3	3	2	4	3	1	2	2	1	1	2	2	3	1	3	3	1	1	2	1	3	2	1	2	3	4	3	3	4	2	2	2	2	1	3	1	2
1	24	4	4	5	4	3	5	5	3	5	4	5	5	3	3	2	3	5	3	5	4	5	3	4	3	3	4	5	4	5	4	3	4	4	3	3	4	3	2	3	2	2	2	1	2	2	2	2	1
1	22	7	5	7	6	5	6	6	7	5	6	6	6	7	6	7	6	1	1	1	1	2	2	3	1	2	3	1	1	3	1	1	1	1	1	1	2	4	3	3	4	3	3	4	4	4	3	4	3
1	20	5	5	6	5	1	1	3	1	3	2	4	3	1	3	3	1	1	2	3	2	2	3	4	4	3	4	4	3	4	5	1	3	2	2	4	4	2	2	1	3	1	4	2	3	3	3	4	1
1	21	6	5	4	5	6	6	4	6	5	5	3	4	3	3	4	4	1	2	2	3	3	4	5	4	3	3	1	3	1	2	1	1	3	2	4	5	3	3	2	3	3	1	2	1	1	1	2	1
2	22	1	3	1	1	7	5	5	6	3	2	3	5	5	3	3	5	2	1	2	2	1	1	1	3	1	3	1	2	2	1	1	3	2	1	1	1	4	3	2	2	3	2	2	2	3	3	3	2
2	20	1	4	1	1	4	5	4	4	1	3	2	2	3	4	5	3	3	4	3	4	4	5	3	5	4	5	5	5	4	4	1	2	3	3	1	2	4	2	3	3	2	3	3	3	3	3	2	2
1	25	5	5	5	7	6	5	7	7	4	4	4	6	6	6	7	4	2	1	2	2	3	2	1	2	2	2	1	3	1	1	2	3	2	3	2	3	4	4	4	4	4	4	3	3	4	4	3	3
1	22	5	5	6	3	5	4	3	4	3	4	4	4	6	4	6	3	4	3	3	5	3	4	5	3	3	3	3	3	3	3	3	4	2	3	4	3	3	3	3	3	2	3	3	3	2	2	3	3
1	23	4	4	3	4	5	6	4	5	3	3	2	3	7	4	7	6	3	4	3	4	3	1	3	3	3	3	2	3	3	4	2	2	3	2	1	3	4	3	4	2	2	4	2	3	4	3	4	3
2	24	3	4	4	3	5	5	3	4	6	5	3	5	3	5	2	3	3	4	4	3	4	1	3	3	3	2	5	5	3	3	4	5	4	4	3	2	1	2	1	2	2	3	3	2	3	3	3	1
2	21	3	2	2	2	4	3	3	3	4	4	2	3	3	5	4	3	5	4	3	5	5	1	2	3	1	3	4	3	3	3	2	3	3	3	3	3	1	2	2	1	2	3	3	3	3	2	3	3
1	22	7	6	4	7	5	6	6	5	5	5	7	6	7	4	6	6	1	3	3	3	3	3	2	4	2	3	1	2	2	2	4	4	5	4	5	3	3	2	3	3	2	4	4	3	2	2	2	4
1	22	2	2	3	4	2	3	2	3	7	6	5	4	2	3	4	2	2	2	1	1	1	1	2	3	1	3	2	3	3	3	1	2	3	1	1	2	1	1	1	2	1	2	3	2	2	2	2	1
1	26	2	3	3	1	3	2	2	5	1	1	1	3	4	4	2	5	3	4	4	4	4	1	3	2	3	2	5	5	4	4	4	5	4	4	3	3	1	2	2	2	1	2	1	2	3	2	1	1
2	18	7	5	5	5	6	6	6	5	7	5	4	5	7	6	5	5	2	4	3	4	3	2	3	4	2	4	3	4	3	2	2	2	3	2	2	3	4	4	2	3	2	3	3	3	2	2	2	3
2	20	5	5	4	4	3	4	5	3	7	4	6	5	7	5	6	4	2	4	2	2	4	4	3	4	5	4	2	2	3	4	4	3	4	3	4	5	3	2	3	2	3	3	3	2	2	2	2	3
2	20	1	1	3	3	3	5	2	3	4	4	4	3	2	2	4	4	5	5	4	4	4	3	3	4	3	4	3	4	4	3	3	2	2	3	1	2	4	2	4	4	4	2	1	3	2	2	2	4
2	19	3	3	4	3	6	3	4	4	2	4	2	4	6	5	6	5	5	4	4	5	4	1	3	3	2	3	4	5	4	3	1	2	2	3	2	4	2	2	2	2	1	2	3	2	3	1	2	1
2	19	5	5	5	6	7	5	7	7	2	4	3	3	1	4	2	2	3	4	4	3	4	5	5	5	4	5	4	4	3	5	5	5	5	4	2	3	3	2	2	3	2	3	3	2	2	2	2	1
2	19	2	4	3	4	4	4	4	5	4	4	5	5	4	3	5	2	3	3	4	3	4	4	3	3	5	3	1	2	2	2	3	4	3	2	4	5	2	2	2	3	2	4	4	3	4	3	2	2
2	18	2	2	3	4	4	4	3	4	5	3	3	3	1	2	4	4	3	1	1	1	1	3	3	1	3	1	2	2	1	2	3	1	3	3	1	3	2	2	3	2	3	3	3	2	2	3	2	1
2	20	6	5	6	3	1	4	1	3	2	2	3	2	3	2	4	2	5	5	4	4	5	5	4	4	4	4	3	2	3	3	1	3	2	2	3	2	3	2	3	3	3	4	3	2	3	3	3	4
2	21	1	1	1	2	7	4	4	4	1	4	2	4	3	2	5	2	3	3	4	2	2	2	3	4	3	2	1	3	3	2	4	3	3	5	1	2	4	4	3	3	4	4	3	3	3	2	4	4
2	19	6	4	5	6	1	4	1	3	4	3	5	3	1	2	2	2	5	5	5	5	3	2	3	2	4	3	5	3	4	4	2	2	3	4	2	3	3	3	3	3	3	2	1	3	3	2	2	2
1	18	3	2	4	4	6	5	5	6	2	2	4	2	5	4	5	6	3	1	1	3	1	2	2	1	3	3	2	1	1	1	1	2	3	3	3	1	2	2	2	3	1	4	2	2	3	2	4	2
2	19	1	2	3	2	1	2	2	1	4	3	4	4	1	1	2	2	1	1	3	1	3	4	4	3	5	4	3	4	3	4	2	2	2	4	4	3	2	2	2	3	2	4	3	3	4	2	2	1
2	20	5	6	6	7	5	7	7	6	5	6	7	5	7	6	6	5	2	3	2	2	2	2	2	1	3	2	2	1	3	1	1	1	2	1	2	2	3	4	3	4	4	4	3	3	4	3	3	4
1	21	4	2	5	4	4	3	4	5	1	1	2	1	4	3	4	5	4	4	3	4	3	5	4	5	5	4	3	4	4	4	4	4	4	4	4	5	2	2	2	3	1	3	2	2	3	3	2	3
2	20	7	6	4	6	4	2	5	2	3	4	4	5	5	3	4	5	4	5	5	5	4	1	3	1	3	2	3	3	4	3	4	4	4	3	4	3	2	2	2	3	1	1	1	1	2	2	2	1
2	18	6	3	5	6	7	6	7	4	5	3	3	5	3	2	4	4	1	2	1	1	2	1	2	3	3	2	2	3	3	2	4	3	5	5	5	3	1	2	2	2	1	3	2	2	2	3	2	2
1	20	2	4	3	2	3	2	4	5	4	4	3	3	7	6	7	4	2	3	2	3	3	1	2	2	1	2	4	4	4	4	1	3	3	1	3	4	2	3	2	3	1	4	3	3	2	4	3	4
2	18	5	5	5	5	2	3	2	4	1	3	1	4	3	5	3	4	3	4	3	3	4	3	3	4	2	3	3	4	2	2	1	3	3	1	3	3	3	3	3	2	2	1	2	2	2	2	2	2
1	22	6	6	4	6	7	4	6	4	6	5	6	5	5	5	4	5	3	4	3	4	4	4	3	4	3	3	4	3	4	4	3	3	4	4	2	4	4	4	3	4	4	3	2	2	2	3	2	3
2	22	6	6	5	6	7	5	6	5	6	4	4	6	7	6	7	4	5	4	3	4	4	3	3	4	2	2	1	1	2	3	2	3	2	3	2	2	2	2	2	2	2	3	2	2	3	3	3	4
2	20	7	5	4	4	4	5	3	2	4	4	3	3	2	2	1	4	3	2	4	3	2	4	4	3	3	5	2	3	3	3	2	2	4	3	4	3	4	3	4	3	3	4	4	3	3	4	2	4
2	18	3	5	3	3	1	3	1	4	7	5	4	5	6	6	3	5	2	1	2	2	2	2	1	3	1	1	3	3	1	1	1	2	1	2	1	3	1	1	1	1	2	3	2	3	3	3	2	3
1	19	7	6	7	6	7	7	6	6	6	6	7	4	6	4	4	5	3	3	1	2	3	2	2	1	3	1	1	3	3	3	2	2	1	1	2	3	4	3	4	3	4	4	3	4	3	3	3	3
2	19	7	4	7	7	4	4	5	7	7	6	7	6	5	6	7	7	2	3	3	3	2	2	3	4	2	2	5	4	4	5	2	4	3	2	2	3	3	3	2	2	2	3	3	2	3	3	3	3
2	20	2	1	4	2	7	7	4	4	6	4	3	6	5	6	6	3	4	4	4	4	3	5	4	4	4	4	4	3	5	3	3	4	3	3	1	2	2	2	2	2	2	2	2	2	1	2	2	4
1	19	1	3	2	3	5	4	5	3	4	5	3	4	3	4	3	5	1	2	1	2	2	4	3	3	3	4	3	3	4	4	3	4	2	4	1	2	3	2	2	2	2	3	3	3	2	2	3	1
2	21	1	1	2	2	3	2	4	4	1	4	3	4	2	2	2	3	2	3	2	3	2	3	3	3	3	3	4	3	3	3	5	5	5	4	2	3	4	3	3	3	3	2	2	2	3	2	3	3
2	20	5	4	3	3	7	4	6	6	2	2	4	2	2	4	2	1	4	3	4	3	3	2	3	2	2	2	2	2	2	2	4	3	3	3	3	2	2	2	1	2	2	2	3	2	1	3	3	2
1	21	6	6	6	5	7	7	6	6	7	5	5	6	5	5	4	4	2	4	4	2	3	3	3	2	2	2	3	4	4	2	5	5	4	4	1	2	3	2	3	3	2	2	2	2	3	1	1	3
1	20	3	4	2	5	7	6	6	6	5	3	5	5	4	5	2	3	2	2	3	2	3	2	3	2	3	4	5	4	3	4	3	4	3	3	1	2	1	1	2	2	2	2	2	2	2	1	2	1
1	20	2	4	2	3	4	5	3	4	3	5	4	4	2	3	2	4	1	2	3	3	2	1	3	1	2	3	3	4	4	3	3	2	2	4	4	5	3	3	2	3	3	2	2	1	2	1	2	2
1	20	2	4	3	2	2	4	4	3	7	4	5	4	1	3	2	2	2	4	4	3	3	5	5	3	4	4	2	3	2	4	2	2	2	3	5	4	2	3	1	2	3	2	1	2	2	3	1	2
1	20	5	6	3	3	4	2	5	3	5	4	3	3	1	3	3	1	2	2	3	2	4	5	3	5	5	5	2	4	2	2	4	5	5	3	2	3	2	1	1	2	1	3	3	2	2	2	3	3
2	20	5	5	3	5	1	1	4	4	1	2	2	3	4	4	5	4	4	5	4	3	4	2	3	3	2	2	4	4	3	3	5	4	4	3	1	2	1	1	2	1	2	1	2	1	2	2	2	2
1	20	4	5	5	5	5	5	4	4	6	5	3	5	7	4	5	4	2	3	3	3	2	3	2	3	3	4	2	4	3	3	2	4	3	3	1	2	3	2	3	2	2	2	3	2	1	3	2	3
1	19	6	3	4	6	4	2	5	5	7	5	5	4	1	3	4	4	4	4	5	4	4	2	3	4	3	4	3	4	3	4	5	4	4	5	2	2	1	2	1	2	2	1	2	2	1	1	2	4
1	19	3	4	5	3	2	2	3	2	3	2	3	3	7	4	5	5	2	2	4	2	3	1	3	3	2	1	2	3	2	4	1	2	1	1	4	3	4	3	4	2	4	2	1	3	2	1	1	3
1	20	7	5	4	4	3	3	3	3	6	6	5	6	4	3	4	3	1	2	3	3	2	1	3	2	3	2	5	5	4	4	5	5	5	3	4	3	4	3	3	4	4	3	4	3	3	4	3	4
2	22	4	5	2	5	1	3	2	1	2	2	3	1	1	2	2	1	5	5	3	5	3	1	3	3	2	2	4	4	3	3	5	4	5	3	2	4	2	2	1	2	3	1	2	2	1	2	2	3
2	21	2	1	4	3	5	3	5	3	5	3	6	6	2	4	2	2	4	3	5	3	3	1	2	2	2	2	4	4	3	3	5	4	4	3	2	2	4	2	3	4	2	4	3	3	4	3	4	2
2	19	5	3	4	6	1	2	3	3	2	3	2	3	1	3	1	3	3	1	2	1	1	3	2	3	2	3	3	3	1	2	3	1	3	3	3	1	2	1	2	2	2	1	1	1	1	1	1	4
1	19	7	4	6	5	2	2	4	4	5	4	4	5	2	1	2	2	1	1	1	1	2	1	1	3	1	1	3	3	1	1	2	2	1	2	3	1	3	2	3	2	3	1	1	2	2	1	2	4
1	19	4	4	3	4	6	5	4	5	2	2	2	3	2	2	2	4	1	3	3	1	2	5	4	4	5	5	4	4	3	5	2	2	4	4	3	3	3	2	2	2	2	3	2	3	2	2	2	4
1	21	5	4	4	6	3	5	4	3	4	4	4	5	3	4	4	4	4	3	5	5	4	4	4	3	5	5	5	5	4	4	1	3	2	3	3	3	1	1	1	2	1	3	3	3	2	2	2	2
2	19	5	5	3	3	7	7	6	4	1	2	4	3	5	5	3	5	1	1	3	3	2	2	2	2	3	2	2	3	3	1	2	1	2	1	3	3	2	1	1	3	2	1	1	2	2	2	2	4
1	20	7	7	4	5	4	4	3	4	4	4	5	5	4	4	3	5	3	4	3	4	3	2	2	3	3	4	3	4	3	3	3	4	4	3	5	3	4	2	3	2	2	4	3	4	2	3	2	3
1	20	2	2	4	4	4	4	3	4	1	2	2	1	6	4	4	6	4	4	4	4	3	4	3	3	4	3	3	2	3	4	4	5	3	3	2	4	2	3	2	1	2	4	2	3	3	3	4	2
2	19	3	2	4	5	4	3	3	3	7	5	5	7	7	4	7	7	3	3	3	4	3	2	4	3	2	2	3	4	4	4	2	3	2	3	1	3	2	2	2	1	1	3	2	3	2	2	3	1
2	20	5	3	4	3	5	4	3	5	3	4	4	4	2	3	2	1	5	4	4	5	4	4	3	5	3	5	2	3	2	2	5	4	5	4	4	4	3	2	3	2	3	4	3	3	3	2	3	1
2	19	3	4	3	2	7	4	6	6	2	2	4	3	4	5	3	3	1	2	2	1	3	2	3	3	3	2	2	2	2	2	3	3	3	1	1	1	3	2	2	3	3	4	4	3	4	4	3	3
2	18	3	2	2	4	1	4	4	1	1	1	4	3	5	5	5	6	2	3	3	3	3	5	5	3	5	5	3	4	3	4	3	3	4	3	5	5	1	2	1	2	1	1	2	2	2	2	1	4
2	19	2	3	2	3	1	1	4	3	1	2	4	2	1	3	1	1	1	1	3	2	3	1	3	3	3	2	4	3	3	3	4	3	3	5	4	4	2	2	3	3	1	3	3	3	3	3	2	1
2	18	5	5	7	4	5	4	4	6	5	5	7	5	5	6	7	4	2	1	2	1	1	1	3	2	2	2	1	2	1	2	1	1	3	3	2	1	4	3	3	3	4	3	3	3	3	4	4	4
1	19	4	4	5	3	1	1	4	1	6	5	5	5	6	3	5	5	5	3	3	4	3	3	2	4	3	4	5	5	4	5	2	2	3	3	2	3	4	4	2	4	4	3	2	3	2	2	3	4
1	22	5	4	4	3	6	5	4	5	2	4	4	4	5	3	3	5	1	3	3	3	2	5	4	4	4	5	3	4	3	4	4	5	4	4	5	5	1	2	1	2	2	2	2	2	1	2	2	1
1	19	2	2	3	4	4	2	5	3	3	3	4	4	1	4	2	1	4	3	3	4	3	1	3	2	2	2	3	2	3	4	2	3	2	3	3	4	1	1	2	2	2	2	2	2	2	3	2	2
2	18	6	5	7	7	6	6	6	6	7	7	7	6	6	5	7	4	3	2	3	4	3	1	1	1	2	2	4	4	4	5	3	4	2	4	3	2	4	2	2	3	3	3	2	2	2	2	2	4
1	20	2	1	2	3	2	4	2	4	6	5	5	6	7	5	4	4	3	4	4	3	4	3	2	4	4	4	2	2	2	2	5	4	5	3	3	2	2	1	2	1	1	3	3	3	3	3	2	2
1	23	1	3	3	1	2	3	2	2	3	3	5	5	3	5	4	2	4	4	5	5	3	3	3	3	4	4	2	2	2	3	3	4	3	3	5	4	4	3	4	4	3	2	3	3	3	2	2	4
2	20	5	3	3	5	2	3	2	2	1	1	2	3	6	6	4	6	1	1	1	2	2	2	2	3	2	3	5	5	4	3	3	3	4	4	5	4	3	3	2	2	2	3	3	3	2	2	2	2
1	20	7	5	6	7	6	6	7	4	6	6	7	6	5	4	5	6	1	1	2	1	2	2	1	2	3	3	1	1	3	1	2	3	3	3	3	3	4	4	4	3	3	4	3	4	4	3	4	4
2	19	3	4	3	4	1	2	2	1	3	5	4	2	1	3	2	4	1	1	2	2	3	4	3	4	5	4	4	3	5	3	2	4	3	2	1	2	4	3	3	4	4	3	2	3	2	2	3	3
2	19	2	4	4	2	7	4	5	6	2	2	2	3	7	5	4	5	4	4	3	5	4	1	1	2	1	2	1	2	3	1	5	5	4	4	2	3	3	3	3	3	2	2	2	3	1	3	3	1
1	19	2	4	2	2	4	5	4	3	4	4	2	5	3	3	4	3	1	2	2	1	3	1	3	1	3	2	3	4	3	4	4	4	3	5	1	2	4	4	4	3	3	3	2	2	2	2	2	2
2	19	6	6	6	7	6	7	7	6	6	7	4	4	6	6	7	4	1	3	3	2	3	2	2	2	2	2	1	3	2	1	1	2	2	3	1	1	4	4	3	4	4	3	3	4	4	4	4	3
2	21	6	3	5	5	6	6	5	6	7	7	5	4	7	6	6	5	4	5	3	4	4	2	2	2	4	2	1	2	2	2	3	3	4	4	3	4	3	3	3	2	3	3	2	3	3	3	3	1
2	19	5	6	7	7	7	5	5	6	5	6	5	5	6	5	7	6	1	3	1	3	2	2	3	3	2	3	1	2	1	2	3	3	4	4	3	3	2	3	3	3	2	1	1	1	1	1	2	1
2	19	7	6	7	7	6	5	5	4	5	4	5	6	4	6	4	5	1	3	1	1	2	1	1	1	2	3	2	2	1	3	2	1	3	1	1	1	4	4	4	4	4	3	3	3	3	4	4	3
2	18	6	4	4	4	3	2	2	4	6	6	5	4	7	5	5	4	5	5	5	4	3	2	4	2	2	3	2	3	2	3	3	4	4	3	1	2	3	3	3	4	4	4	3	4	3	3	3	3
2	18	5	5	6	7	5	5	4	5	7	4	6	5	4	5	5	4	1	1	2	3	3	4	3	5	4	4	3	3	4	3	2	3	2	2	2	4	1	1	2	2	2	2	3	1	3	3	2	3
2	18	2	2	3	2	6	5	3	3	3	2	4	3	4	4	5	5	1	3	3	3	3	5	5	4	5	5	1	3	2	2	2	4	2	3	5	4	2	3	2	2	1	2	2	2	3	2	2	4
1	20	5	4	3	5	2	3	4	3	6	4	3	3	4	3	3	2	1	3	2	1	1	3	3	2	3	2	1	2	2	1	3	4	2	4	2	3	3	3	3	2	2	2	3	1	2	2	2	1
2	20	3	2	4	2	3	4	2	5	7	4	6	7	6	4	3	4	3	4	4	2	4	4	3	4	3	3	1	1	2	2	2	2	2	2	5	5	1	2	1	2	1	2	3	1	3	2	1	3
2	18	1	1	1	1	4	5	5	2	7	6	4	4	2	1	4	4	5	5	5	4	5	2	4	2	2	3	4	3	4	4	1	3	3	2	4	3	2	3	3	2	1	3	3	3	3	2	3	4
1	20	5	3	5	5	3	3	2	4	4	2	2	4	4	4	5	3	5	4	3	3	3	2	2	2	2	2	3	2	3	4	2	2	2	3	4	3	3	2	2	3	3	2	2	2	2	2	1	1
2	19	5	4	5	4	4	3	3	5	3	2	2	2	6	6	6	4	5	3	3	4	4	2	2	3	2	3	5	5	4	5	4	4	4	3	3	3	1	2	2	1	2	2	1	3	3	2	1	3
2	20	5	4	4	4	4	5	3	5	3	2	4	5	2	4	4	2	2	3	3	2	2	1	1	3	1	2	3	4	4	3	5	3	5	4	2	3	1	2	2	2	2	1	2	1	1	2	2	1
2	20	5	3	4	4	1	1	3	1	2	4	3	4	4	3	4	3	4	4	3	4	4	2	3	4	2	3	4	4	4	3	2	2	3	2	1	3	2	1	2	1	3	4	4	3	3	3	4	4
2	20	4	4	3	3	5	3	3	6	6	4	6	6	7	5	5	7	4	3	5	3	4	1	1	2	2	3	3	4	4	3	3	2	3	4	4	3	4	3	2	4	3	3	2	2	2	3	3	1
2	20	5	4	3	3	3	3	2	4	1	3	4	4	5	4	6	6	1	3	3	3	3	1	3	1	3	2	2	3	3	3	5	3	5	5	3	3	1	1	2	1	2	2	3	2	1	2	3	1
2	20	6	6	6	4	6	5	6	6	6	7	6	4	6	7	7	6	1	3	1	3	3	2	3	1	3	1	2	3	1	1	3	3	1	1	2	2	3	3	4	3	4	4	4	4	4	4	4	4
2	19	2	3	1	1	6	5	4	6	6	6	4	4	3	5	3	2	2	4	3	2	3	2	4	3	2	2	4	4	5	5	2	3	4	3	1	3	2	2	3	1	2	4	4	4	3	2	4	4
2	18	3	5	3	3	7	6	5	7	6	4	6	5	1	1	3	4	5	3	5	5	4	3	4	2	2	4	4	5	3	4	4	3	4	3	5	4	4	3	3	4	3	3	2	2	2	2	2	4
1	21	1	3	3	2	4	4	4	4	4	5	4	3	2	4	3	1	2	2	3	2	3	4	3	3	4	3	4	3	4	4	3	4	4	2	4	4	4	3	2	4	3	4	3	3	3	4	4	3
1	21	6	5	6	3	4	3	3	5	1	2	2	3	5	3	5	6	2	4	3	3	2	4	3	3	3	4	2	3	4	4	4	3	3	3	2	2	1	2	2	2	2	2	3	1	1	2	3	3
1	20	2	2	3	4	5	3	5	4	7	6	4	6	4	4	3	5	3	3	3	3	3	5	4	5	3	4	5	5	3	3	5	4	4	5	1	2	3	3	2	3	3	2	3	2	2	2	2	3
2	18	2	4	2	3	6	5	5	6	6	5	6	4	3	4	4	2	3	4	4	2	2	4	3	3	3	3	4	4	4	4	1	1	2	2	4	5	2	2	3	3	2	1	2	1	2	1	1	1
1	19	5	4	6	3	5	3	5	3	4	5	3	3	3	2	2	3	5	4	3	3	3	4	5	4	4	4	1	2	3	2	5	5	4	4	4	5	2	2	2	3	2	1	1	2	2	2	2	2
2	21	5	4	5	4	7	6	6	5	5	4	3	6	4	2	2	4	2	3	1	3	2	2	1	2	1	1	2	2	1	2	3	1	1	1	1	3	3	2	3	2	2	4	4	3	2	3	4	3
1	20	6	3	5	3	1	3	2	3	1	4	3	3	2	2	3	4	2	4	2	4	2	1	2	2	3	3	2	2	2	3	2	2	3	4	3	2	4	4	2	4	2	4	2	3	4	4	3	2
2	20	7	7	5	6	4	4	5	5	4	3	5	4	2	4	1	3	5	5	5	4	5	5	5	4	5	3	2	4	3	2	3	3	4	4	1	2	2	3	2	1	1	2	2	2	2	3	3	3
2	18	4	3	3	3	3	3	4	5	3	3	3	5	5	4	4	3	3	4	3	4	3	2	2	4	2	3	3	4	2	3	4	5	3	4	1	2	4	3	2	2	2	3	2	2	2	2	2	2
2	19	6	4	5	5	5	3	3	5	1	1	1	4	7	4	5	6	2	2	4	2	3	2	4	4	2	2	4	4	4	3	2	4	3	3	2	3	1	1	1	1	2	3	3	3	2	2	3	3
2	21	2	3	1	3	5	6	3	3	6	3	5	6	4	4	3	3	4	4	4	3	4	4	4	4	4	3	5	4	4	4	5	4	5	3	1	3	4	3	3	2	4	3	2	3	2	2	2	2
1	21	6	6	7	7	7	6	4	4	5	5	6	5	7	6	6	4	2	1	2	2	2	2	3	2	1	1	1	3	3	2	3	3	1	2	2	1	3	3	3	4	3	3	4	4	3	3	3	3
2	19	6	5	4	6	2	1	2	1	1	3	2	2	4	3	2	4	1	2	3	2	3	1	2	3	2	1	4	3	3	3	2	2	2	4	4	3	1	2	1	1	1	4	3	3	4	2	2	1
1	20	2	4	2	4	2	3	2	4	3	4	4	5	1	3	2	4	5	4	5	5	4	3	2	3	2	4	3	4	3	4	2	2	3	4	5	3	3	3	2	3	2	2	3	1	2	1	2	3
1	19	4	5	3	5	2	1	2	2	5	5	4	6	5	3	4	3	5	5	4	5	3	2	4	3	2	3	3	3	4	3	2	2	2	2	4	4	1	2	2	2	2	3	2	3	2	3	2	1
2	18	2	1	1	2	2	4	2	4	6	5	4	4	4	4	5	4	5	4	5	5	5	3	4	3	3	4	3	4	4	3	2	2	2	4	1	3	4	2	2	3	3	2	2	1	2	3	2	4
1	20	2	2	2	2	5	4	4	5	2	3	1	2	1	3	4	2	1	2	2	1	2	2	3	3	3	2	4	3	4	5	4	3	4	5	4	4	4	3	3	4	3	4	3	2	2	2	2	1
1	19	2	2	3	4	7	6	7	4	6	5	5	4	4	3	4	5	1	3	3	2	2	5	5	4	5	3	3	3	3	4	4	4	4	5	5	4	4	4	2	3	2	3	2	3	2	2	3	4
2	20	4	7	7	7	7	5	5	4	5	5	6	6	5	7	5	7	2	1	3	2	2	1	1	2	2	2	2	2	2	1	2	3	2	3	1	1	4	3	4	4	3	4	4	4	4	3	4	3
2	19	5	4	4	4	7	6	5	4	4	4	2	5	6	6	6	6	2	3	3	2	2	3	3	1	3	2	2	1	3	2	2	2	2	3	3	1	1	1	2	1	1	2	1	2	3	3	1	1
1	20	4	4	2	5	5	4	5	4	6	4	6	6	7	6	6	6	2	3	3	2	2	1	3	3	1	1	2	2	2	2	2	2	2	2	2	1	3	3	2	3	3	3	2	2	3	2	3	3
1	20	4	4	3	5	2	4	2	4	4	2	4	4	5	5	4	4	3	2	3	3	2	2	2	3	2	1	3	1	3	3	2	2	2	2	1	3	4	4	4	2	2	3	3	2	3	3	2	3
1	19	3	4	3	3	6	5	6	5	3	5	3	5	1	3	2	2	4	4	4	3	3	3	3	4	3	2	2	3	3	4	3	3	4	2	3	3	4	2	3	2	3	3	2	2	3	2	2	3
1	20	4	6	7	4	5	7	7	4	6	4	6	6	4	7	5	5	1	2	1	2	1	3	1	3	3	1	1	2	2	2	2	2	2	2	3	3	4	4	4	3	3	4	3	4	4	3	3	4
1	18	7	5	5	6	1	3	2	2	4	4	5	2	3	4	2	4	1	1	2	2	2	3	3	4	2	3	1	2	3	3	4	3	4	3	1	3	2	2	2	1	2	3	2	2	2	2	3	3
2	19	4	5	5	5	7	4	7	4	4	5	4	7	6	6	6	6	1	1	1	1	1	2	1	1	1	1	2	3	3	2	2	2	3	2	2	3	4	3	3	3	3	4	3	3	3	3	3	4
1	18	7	5	7	4	6	5	6	7	7	7	4	4	6	7	4	4	1	3	3	3	2	2	3	2	2	2	2	2	2	2	2	2	2	2	2	2	4	3	3	3	4	3	3	3	3	3	3	3
2	21	4	2	3	3	5	4	6	3	4	3	4	3	2	4	1	4	3	3	1	1	3	2	2	2	1	2	1	1	1	2	3	2	1	3	1	3	3	2	3	2	3	3	2	3	2	2	2	1
1	19	3	2	3	2	7	5	6	4	5	3	4	4	1	3	1	2	4	3	4	4	3	4	4	5	3	5	5	4	5	3	4	3	4	3	1	2	3	2	3	3	2	4	3	3	4	3	3	3
1	19	7	4	5	4	5	6	3	4	2	3	2	4	3	4	3	5	4	3	4	3	5	4	4	4	4	5	4	3	5	4	5	5	5	3	4	3	3	3	2	2	2	4	2	3	3	3	3	1
2	18	1	3	3	1	4	3	5	4	6	5	5	6	5	6	4	5	1	1	3	2	1	1	2	2	3	2	2	3	3	4	3	4	3	4	5	3	3	3	3	3	3	3	3	3	2	3	2	2
1	20	1	1	3	4	7	6	4	5	4	3	5	4	7	5	6	6	1	2	3	2	3	3	3	4	3	3	3	4	4	2	3	3	3	4	3	3	4	4	4	3	4	3	3	3	2	3	3	2
2	18	2	3	3	3	6	6	3	5	3	4	3	4	3	4	3	3	2	2	3	2	2	4	3	3	4	4	3	4	3	2	2	3	3	3	2	3	3	3	2	2	2	1	2	1	2	2	2	3
2	22	2	2	2	1	4	5	4	3	4	5	2	4	2	4	4	3	1	3	3	1	3	4	4	4	4	3	5	3	5	5	2	4	4	4	5	4	1	2	2	2	2	1	2	2	1	2	1	3
2	23	1	3	3	3	2	2	4	3	2	2	2	3	5	6	6	4	3	3	3	4	3	5	5	4	4	4	1	2	3	2	3	3	4	2	5	3	4	4	4	3	4	3	3	4	4	4	4	3
1	21	6	6	6	6	4	5	2	5	7	6	5	6	4	3	3	2	1	2	1	1	2	2	3	4	2	3	4	3	4	3	5	5	3	5	3	3	2	3	2	2	2	1	2	2	2	2	2	3
2	19	6	5	5	5	4	5	3	3	1	3	3	2	4	2	4	3	2	3	2	4	2	3	4	3	4	4	3	3	2	2	1	2	2	2	3	3	3	3	3	2	3	4	3	2	3	3	3	1
1	21	3	4	3	4	2	1	3	2	5	6	5	3	4	3	5	4	1	2	3	3	1	3	3	4	4	4	1	3	2	3	4	5	4	5	1	1	3	3	2	2	3	2	3	3	3	2	3	2
1	19	6	5	4	6	1	1	3	2	6	6	3	6	2	3	2	4	1	3	3	2	2	4	4	4	3	3	2	2	3	2	4	3	3	4	5	3	4	3	3	3	3	1	1	2	1	2	1	4
1	18	4	5	5	4	3	3	3	2	4	2	3	4	4	2	3	5	4	3	4	3	3	1	3	2	3	3	4	3	5	3	3	3	3	2	3	3	4	3	2	2	4	2	1	2	1	2	3	2
1	19	2	3	1	2	4	2	2	5	6	4	6	4	1	3	3	4	4	4	4	3	4	4	4	4	3	3	5	5	3	3	5	4	5	4	3	3	4	2	3	2	4	2	2	1	1	3	3	2
2	18	7	5	7	5	4	5	6	7	6	7	7	4	5	6	5	4	1	3	2	1	3	3	2	2	1	3	2	3	2	2	1	3	3	3	2	1	3	4	3	4	4	4	3	3	3	3	4	3
2	19	3	4	3	2	1	2	3	2	3	3	3	4	7	4	5	5	4	3	3	3	3	2	2	3	4	4	3	2	3	4	2	2	3	4	1	1	4	4	4	3	4	3	2	3	2	3	3	1
1	19	7	5	7	7	4	2	2	3	4	4	3	4	5	6	3	5	3	2	2	4	4	5	5	5	5	4	4	4	4	3	1	3	3	2	2	3	1	2	2	2	2	4	3	3	3	3	2	3
1	19	5	6	4	5	5	5	5	6	1	2	2	1	1	3	2	1	3	4	4	3	2	4	3	3	3	3	5	4	5	4	2	2	4	4	1	2	1	1	2	1	1	2	2	2	3	3	2	1
2	19	7	5	6	6	7	6	4	4	7	5	7	5	4	5	4	5	1	2	2	1	3	4	5	3	3	4	2	2	3	4	5	4	5	5	1	3	4	4	2	3	3	1	1	2	1	2	1	3
2	19	3	3	2	2	4	3	4	3	6	5	4	4	4	3	3	3	3	2	3	4	2	1	2	1	3	1	3	3	4	3	3	2	4	2	5	4	4	4	2	4	2	3	3	2	2	2	2	3
2	20	6	4	3	6	7	5	7	6	2	1	3	2	4	5	2	4	3	2	1	3	1	1	2	2	2	2	2	2	1	1	2	3	3	2	1	1	3	3	3	3	2	2	2	2	1	2	2	3
2	20	3	2	4	3	6	5	5	4	1	3	2	3	2	4	4	3	3	3	4	2	2	3	3	3	3	4	1	3	3	2	1	2	2	2	1	3	4	4	4	3	3	3	4	4	3	3	3	3
1	18	6	3	6	3	5	4	3	4	5	4	4	6	4	5	5	2	3	1	1	1	3	3	1	3	1	3	2	2	3	1	1	3	1	1	2	1	4	3	3	4	4	3	3	3	3	3	3	3
2	18	4	7	7	7	6	5	4	7	5	7	6	4	7	6	5	5	1	3	1	3	3	2	2	3	2	2	2	1	1	2	1	2	2	3	1	1	4	4	4	4	4	4	4	3	3	3	3	3
2	19	4	3	5	5	5	6	5	6	6	4	5	4	7	7	5	4	1	3	2	1	2	3	3	3	2	4	1	1	2	3	4	5	5	4	5	5	3	2	3	3	3	2	2	2	1	2	2	2
1	19	2	3	1	2	6	5	5	5	5	6	4	3	2	4	2	4	4	5	4	4	4	2	2	3	4	3	5	3	4	4	5	5	4	4	5	5	4	2	2	3	2	3	3	3	2	3	2	3
2	19	6	4	6	4	4	5	3	5	4	2	3	5	5	5	3	3	1	3	3	2	2	3	4	3	4	2	4	5	4	3	2	2	4	2	2	2	3	3	3	3	3	4	4	3	3	4	4	3
1	18	4	2	4	5	3	2	2	3	7	4	7	5	5	4	4	4	2	4	4	2	3	2	2	4	4	2	4	3	4	3	4	3	3	4	2	3	1	2	2	2	1	2	2	1	1	2	2	4
1	20	7	5	7	7	7	5	5	4	5	4	7	7	7	7	7	7	2	1	3	1	1	1	1	1	1	2	2	2	1	1	2	2	3	1	1	2	4	4	4	4	3	3	3	4	3	3	4	4
2	18	5	5	5	4	4	4	4	3	1	4	4	2	5	6	5	5	1	3	2	3	2	2	2	2	2	3	5	4	4	4	5	4	5	5	5	4	4	3	4	3	2	1	2	1	2	1	2	2
2	18	7	7	4	5	1	3	3	2	4	3	4	4	1	4	3	1	1	2	2	3	3	1	3	2	3	1	5	3	4	4	1	1	2	3	2	2	2	3	2	2	3	2	2	1	3	3	1	1
2	20	7	4	6	5	3	4	3	2	2	3	3	4	5	3	4	3	3	3	1	3	1	3	3	1	2	1	1	2	3	3	1	1	3	3	3	1	3	3	3	4	3	4	3	3	4	3	3	4
2	20	2	4	3	4	1	1	4	3	4	5	2	5	6	4	4	5	1	3	2	3	3	3	2	4	3	3	4	4	4	4	3	4	2	3	4	4	3	4	3	4	4	3	3	3	4	3	3	4
1	18	3	4	4	3	4	3	3	5	5	5	3	3	6	3	6	5	1	2	3	3	2	1	1	3	1	3	4	5	3	4	4	5	3	5	1	1	4	3	2	3	3	1	2	1	2	2	2	1
2	19	2	2	1	3	2	4	4	2	6	6	3	4	7	5	4	5	3	2	2	4	3	1	3	3	2	2	3	4	3	3	3	4	4	4	1	3	4	3	4	2	3	2	3	1	1	1	1	2
1	18	5	3	6	5	3	3	4	5	6	3	4	4	2	4	2	3	5	3	3	5	5	2	2	2	3	4	2	2	3	2	1	2	3	3	1	2	1	1	1	2	1	3	3	3	2	3	2	4
2	19	4	5	2	4	6	6	6	6	7	6	6	4	4	5	5	3	1	2	2	1	2	4	5	4	3	3	3	3	3	2	3	4	3	2	4	4	3	4	3	3	3	3	3	4	3	3	3	4
1	19	6	6	6	4	6	6	3	5	1	2	1	4	3	2	3	3	4	3	4	3	4	1	2	1	2	2	3	3	3	3	5	5	5	4	2	2	4	3	3	3	3	2	2	3	3	3	2	4
1	19	5	7	7	7	5	7	5	7	5	4	6	6	6	6	7	6	2	2	3	1	3	1	2	3	1	1	2	1	2	1	1	3	1	2	2	1	4	3	3	4	3	4	4	4	4	3	4	3
1	19	4	5	4	5	4	4	5	4	5	3	4	3	5	3	6	5	5	5	4	4	4	3	2	4	2	3	3	2	4	3	4	3	3	5	4	3	4	2	3	3	3	2	3	2	2	2	2	4
2	19	7	4	7	6	7	6	5	7	5	6	4	5	7	4	4	7	3	2	2	4	2	3	2	3	4	4	5	5	5	3	4	5	3	3	1	2	2	2	2	2	1	3	3	3	3	2	2	4
1	19	6	6	5	4	3	5	3	4	7	7	6	6	3	4	2	2	1	2	2	3	2	3	4	4	3	2	4	4	4	5	5	3	3	4	2	4	4	2	4	2	2	3	3	2	3	2	3	2
2	19	7	4	4	6	5	4	6	5	7	5	7	4	5	7	6	6	2	3	3	1	3	3	3	1	3	2	1	2	2	1	2	1	2	1	3	3	3	3	4	4	4	4	4	4	4	3	3	3
1	19	5	6	3	3	4	5	5	2	4	4	5	5	6	5	5	5	2	2	2	3	3	1	2	2	1	2	2	1	3	2	2	2	1	2	3	3	4	3	4	2	2	1	2	2	1	2	1	2
2	21	4	3	3	3	2	1	2	2	4	4	3	5	6	5	6	5	1	1	1	2	3	2	2	2	3	2	1	1	1	2	1	3	1	3	1	2	2	2	1	2	3	1	1	2	1	2	2	4
1	21	4	5	5	4	6	6	4	6	6	4	4	5	6	6	4	6	3	3	1	3	3	1	3	1	1	1	1	2	2	2	1	3	2	1	2	2	3	3	3	2	2	4	3	3	3	4	4	3
1	20	3	5	3	5	2	3	4	4	6	5	4	5	2	4	3	3	4	3	5	3	4	1	3	1	1	3	2	4	2	4	4	4	4	3	2	2	4	3	4	3	3	4	3	4	4	3	3	4
2	19	7	4	4	4	7	5	5	5	7	4	4	5	5	6	5	6	4	4	3	4	3	1	2	2	2	1	4	3	5	3	1	2	3	2	4	5	2	3	1	1	3	3	2	3	3	2	2	1
1	20	3	4	2	4	6	3	4	4	6	5	6	6	3	4	4	3	1	2	3	1	2	1	2	1	3	2	4	5	4	4	4	3	3	4	2	4	4	2	3	4	2	3	2	2	3	3	3	2
1	20	7	4	5	4	6	4	3	5	6	6	4	4	6	4	3	5	3	4	4	4	4	1	3	1	2	2	2	3	2	4	3	2	3	3	5	3	3	3	3	3	3	3	2	2	2	2	3	3
2	19	2	2	3	1	7	6	4	4	5	4	4	3	2	4	4	3	4	4	3	4	3	2	2	3	4	3	5	5	3	5	2	2	2	4	2	3	2	3	2	2	3	4	3	4	2	3	2	1
2	18	7	7	6	4	7	5	4	5	7	6	7	7	5	5	6	4	3	3	3	4	3	3	4	3	3	2	3	3	4	2	1	3	3	2	2	4	4	4	3	4	3	4	4	3	3	3	3	3
1	18	3	4	3	3	6	5	4	3	4	4	3	4	3	4	5	3	2	3	2	2	4	2	3	4	2	2	5	4	3	4	5	4	4	4	5	4	1	1	1	2	2	1	2	1	2	1	1	2
1	19	6	4	6	5	2	3	3	1	1	4	1	1	6	4	4	3	1	3	2	1	3	4	4	3	3	5	5	4	4	4	2	2	3	2	1	2	3	3	2	2	2	3	2	2	2	3	3	3
2	18	4	5	5	4	2	4	3	3	6	6	6	6	3	2	4	3	2	3	4	2	3	4	4	4	3	5	3	3	3	4	5	4	5	5	5	4	4	4	3	2	3	3	2	3	3	2	2	4
2	20	2	3	4	3	6	6	6	6	7	6	4	5	3	2	3	3	3	4	2	3	3	1	3	1	2	2	4	4	5	3	4	5	3	3	2	3	1	2	1	2	2	4	3	2	2	3	3	4
2	20	6	4	6	4	1	3	2	2	5	5	6	4	1	2	3	4	3	2	3	3	3	2	4	2	2	3	4	5	4	3	2	2	3	3	1	3	3	2	2	3	2	3	3	3	2	2	2	1
1	20	7	5	4	7	4	5	4	4	4	5	3	2	4	4	4	5	4	4	3	3	4	3	4	4	4	3	3	2	4	2	5	4	5	5	2	4	1	1	2	1	2	1	2	2	1	1	1	3
1	20	7	6	6	5	5	5	6	5	6	7	4	6	5	6	7	4	2	3	3	2	3	4	3	5	4	3	2	3	3	3	4	3	4	4	4	3	4	3	3	3	4	4	3	3	2	3	3	3
2	20	4	7	5	5	6	6	4	7	5	6	7	7	6	7	4	7	2	2	1	2	2	1	1	1	1	3	1	3	3	2	1	1	3	3	2	1	3	3	4	3	3	4	4	3	4	4	3	3
1	21	3	4	4	4	5	4	4	3	5	3	4	5	1	2	4	1	2	2	2	1	1	1	3	2	1	1	1	3	3	2	2	3	3	3	2	2	4	4	3	3	3	2	2	3	1	3	2	3
1	19	7	4	5	4	4	5	5	3	7	5	6	4	4	2	4	3	3	3	2	3	2	5	3	5	4	5	3	3	3	4	5	5	5	5	5	4	2	3	2	1	2	4	4	3	3	4	4	4
2	19	3	2	3	5	1	3	4	1	3	3	4	4	5	3	5	5	5	4	5	4	4	3	3	3	4	4	5	4	5	5	3	3	3	3	2	3	2	2	3	1	3	2	2	1	2	2	3	2
1	19	6	5	6	6	1	3	3	1	5	5	3	5	7	4	4	4	2	2	2	2	3	4	4	3	5	5	3	4	3	2	5	4	4	5	2	3	4	3	3	3	3	4	3	3	2	3	3	3
2	20	4	3	4	5	5	3	5	5	3	5	3	4	7	6	5	5	3	2	4	4	3	4	3	3	4	3	3	3	4	3	4	5	3	3	2	3	4	3	2	3	3	4	4	4	4	3	3	2
1	20	5	3	5	5	7	6	4	4	7	4	6	6	6	6	6	5	4	3	3	3	3	2	3	3	2	3	4	3	3	3	5	3	5	5	5	3	2	3	2	1	2	1	2	1	1	2	2	2
1	20	5	6	3	3	5	3	4	3	3	2	3	3	3	2	2	2	2	2	3	2	3	4	4	5	3	3	3	4	3	3	4	4	4	5	1	2	3	3	3	3	3	1	1	2	2	2	2	1
2	19	2	4	3	4	5	5	4	4	6	6	4	5	1	3	3	2	3	4	3	3	3	1	2	2	3	2	4	5	4	4	3	3	4	4	4	4	2	3	2	1	3	2	3	3	2	2	2	3
1	21	7	4	4	5	7	5	6	6	6	4	6	5	7	5	7	5	2	2	2	3	4	3	4	3	2	3	5	5	4	4	1	2	3	2	1	3	2	2	3	1	3	1	2	2	1	1	2	1
1	18	4	5	2	3	5	3	5	4	4	3	3	4	7	6	5	6	2	4	2	2	2	1	3	3	2	2	5	5	3	5	4	4	3	4	5	4	2	3	2	2	2	2	3	1	3	2	3	2
2	20	7	4	7	4	5	5	4	3	3	5	4	2	5	3	6	3	2	1	1	2	3	2	2	2	3	2	1	3	3	1	2	1	1	2	2	1	3	2	2	3	2	4	2	4	3	4	4	3
1	19	5	5	3	4	1	1	3	2	4	2	4	4	5	6	6	3	2	3	2	3	2	4	3	4	3	3	2	2	4	3	4	4	5	3	1	2	2	2	1	1	1	1	2	1	1	1	1	2
1	20	6	4	3	6	1	4	1	1	7	4	6	5	3	3	3	4	3	3	2	3	3	3	4	4	4	4	1	2	2	1	4	3	5	3	5	5	3	3	4	4	3	4	4	3	3	4	4	4
2	19	1	1	4	3	3	2	2	3	5	4	6	6	3	2	4	2	1	1	2	2	2	3	3	2	3	2	2	2	3	3	5	3	5	4	3	2	4	2	2	2	2	2	1	2	2	3	2	1
2	18	4	4	5	2	2	4	3	2	6	6	5	5	6	6	6	5	5	4	4	4	5	2	2	3	3	2	3	3	2	3	5	5	5	4	3	3	1	1	2	2	2	1	1	1	1	1	2	2
2	20	7	6	5	5	5	6	5	5	4	4	7	5	5	5	6	6	5	5	3	4	4	4	3	4	3	3	1	2	2	3	4	5	5	3	1	3	3	3	4	4	3	4	4	4	3	3	4	4
2	21	2	4	4	2	7	5	6	7	6	6	4	3	3	2	3	5	4	5	3	3	4	3	4	4	3	3	1	2	2	3	4	4	3	5	1	3	2	2	2	2	3	4	2	3	3	4	4	2
2	18	6	4	4	5	5	3	5	3	1	2	3	4	2	1	3	4	4	4	3	5	3	1	1	3	2	2	1	2	3	3	3	4	2	3	3	3	3	2	2	2	3	2	3	1	3	1	1	4
1	19	4	3	3	5	3	4	4	3	6	4	3	3	6	5	6	4	2	4	3	2	3	2	4	2	4	2	4	3	4	5	4	3	3	4	4	3	2	2	2	2	2	3	2	3	2	2	2	2
2	19	6	4	4	5	5	4	3	3	6	5	6	6	1	2	1	3	5	5	5	5	4	4	5	4	4	3	3	3	3	4	1	2	1	3	1	3	1	2	2	2	1	4	3	2	3	3	4	2
2	18	7	6	5	4	5	7	7	6	7	6	6	4	6	4	6	7	2	2	2	1	2	1	3	1	3	2	1	3	3	3	2	3	2	2	3	3	3	4	3	4	4	4	3	4	4	4	3	3
1	20	4	3	2	2	2	2	2	3	5	4	5	5	3	2	2	3	3	3	3	2	4	3	2	3	3	3	3	4	4	3	2	3	2	4	1	2	2	2	3	2	2	2	3	3	1	1	2	2
1	20	6	5	5	6	5	3	4	5	2	3	3	4	5	3	4	4	2	3	3	3	3	2	3	2	3	3	4	4	5	4	2	4	3	3	1	3	1	2	2	1	1	1	2	2	2	1	1	3
1	19	4	3	4	3	1	3	2	2	6	6	4	4	6	5	4	6	2	3	3	4	3	2	4	4	2	4	4	3	4	5	1	3	3	3	1	2	3	2	2	3	3	1	1	1	2	1	1	4
1	20	6	6	6	6	5	4	4	7	5	7	5	7	7	6	5	6	2	2	3	2	2	3	2	4	2	4	2	2	2	2	4	5	4	3	5	3	4	2	3	2	4	3	3	3	2	2	2	4
2	19	6	5	5	7	6	6	7	7	7	4	4	7	7	6	5	7	4	5	3	3	4	2	3	2	3	4	2	2	3	2	4	4	5	3	1	3	2	2	2	2	1	3	2	2	2	3	3	2
2	19	6	5	6	4	4	4	3	5	2	2	2	4	4	5	5	5	3	4	4	3	2	5	4	4	4	3	1	3	1	3	1	3	1	2	2	2	2	3	2	2	2	1	1	1	1	2	2	1
1	20	3	5	4	5	1	3	1	1	2	1	3	4	1	1	2	1	2	2	1	3	2	1	1	1	1	2	1	1	1	2	3	3	3	3	1	1	3	3	3	2	2	4	3	3	3	3	3	1
2	20	5	7	7	4	7	5	7	6	6	4	4	6	6	4	4	7	2	3	2	3	3	2	1	2	2	2	1	3	3	3	2	1	3	1	2	1	4	3	4	4	3	4	4	3	3	3	4	3
2	19	6	4	6	6	3	4	4	4	2	4	2	3	3	3	2	4	1	3	1	1	2	3	4	2	2	3	5	4	5	4	2	3	2	2	5	4	4	3	4	4	4	2	1	1	2	3	1	3
1	19	7	7	7	4	6	6	7	5	6	4	5	4	7	7	4	5	2	2	3	2	3	4	4	3	4	5	5	5	3	3	2	3	3	3	5	5	3	2	2	3	2	2	1	2	1	3	3	3
1	18	7	4	6	4	5	4	4	4	4	3	5	2	4	4	5	3	4	3	3	3	3	5	3	4	5	5	1	3	1	2	2	3	4	3	2	2	3	2	3	2	2	3	3	2	2	3	2	4
2	19	1	2	2	3	5	4	4	3	2	3	1	3	3	2	4	5	4	3	3	3	3	3	4	2	3	4	3	4	3	3	4	3	3	4	1	3	4	3	2	2	3	3	3	3	2	3	2	3
1	20	3	4	5	4	1	2	2	2	6	6	3	3	1	3	2	2	4	3	4	4	3	2	2	4	3	3	5	3	4	5	2	3	2	2	1	2	1	2	2	2	1	2	2	1	3	1	3	4
1	19	5	5	5	5	5	4	7	7	4	5	7	7	4	7	4	5	1	2	3	3	1	3	3	1	1	1	1	2	3	3	1	1	1	3	2	2	3	3	3	4	3	4	3	4	3	3	3	4
2	19	3	2	4	3	3	2	3	4	4	3	4	2	1	4	3	1	4	4	3	4	4	4	4	3	3	3	1	1	2	2	4	4	4	5	2	3	4	4	3	3	4	4	3	4	3	4	4	3
2	19	7	5	4	4	2	2	2	2	5	3	4	6	1	1	1	3	3	3	3	3	2	3	4	3	3	3	5	5	4	4	3	2	2	3	2	3	4	2	3	3	3	2	1	2	1	1	2	4
2	23	4	3	5	4	4	5	4	3	4	2	5	2	1	3	3	3	2	3	3	1	2	3	2	2	1	3	2	2	2	2	2	1	1	1	1	3	1	2	2	2	2	3	2	2	3	3	3	1
2	22	4	5	2	3	5	4	6	3	2	2	3	3	5	3	5	5	1	3	3	2	2	4	3	3	5	4	4	4	4	4	4	4	4	4	5	4	3	2	3	3	3	3	3	2	3	2	3	2
1	20	5	4	6	4	7	4	4	6	6	5	3	4	2	1	2	3	2	4	2	3	3	1	2	2	2	1	2	2	2	3	1	3	3	2	3	3	4	3	3	3	3	1	1	2	1	2	2	2
1	19	4	3	3	5	4	4	3	3	5	5	4	3	7	5	7	6	1	1	1	1	3	2	2	3	3	3	2	2	2	2	2	1	2	1	3	1	3	2	3	3	3	1	2	1	2	1	2	3
1	24	5	5	4	5	3	4	2	2	4	4	5	3	3	4	2	4	1	1	2	1	1	2	2	3	2	1	2	3	2	3	1	2	2	2	1	1	3	3	2	3	3	1	2	2	2	2	2	2
1	22	5	6	7	7	7	6	5	5	6	7	4	6	7	4	6	6	3	3	4	2	4	1	2	1	3	2	3	4	3	4	1	1	2	3	1	1	4	2	3	3	4	1	1	2	1	1	1	2
2	20	5	4	5	5	5	6	7	6	6	6	5	5	6	6	6	4	1	2	3	1	3	3	3	1	3	1	2	1	3	1	2	1	3	1	1	1	4	4	4	3	3	4	3	4	3	3	4	3
1	21	5	6	6	6	6	5	6	3	7	5	6	4	7	7	4	7	1	2	3	3	2	2	2	4	3	3	1	3	3	2	5	4	4	4	5	5	2	2	3	1	2	3	2	2	3	2	2	4
2	26	2	1	3	4	6	3	6	4	7	5	4	6	3	5	4	3	2	2	2	3	4	2	2	3	2	2	4	5	3	3	4	3	5	3	1	2	2	2	2	2	1	1	2	2	1	1	1	2
2	19	2	2	3	3	5	3	4	3	4	3	3	5	6	6	4	5	5	4	5	4	5	5	4	4	5	4	3	4	4	4	3	3	2	2	2	3	2	1	2	2	2	2	2	1	2	2	2	1
2	22	1	4	1	4	5	6	3	5	6	4	5	5	6	6	6	6	1	2	2	3	2	1	2	3	2	2	2	2	1	2	3	1	2	2	2	3	4	3	3	3	2	3	3	3	3	3	3	2
2	24	3	4	4	5	2	1	1	1	2	2	3	2	3	3	4	4	4	3	3	4	5	2	4	2	2	2	3	3	4	4	2	2	2	2	2	2	3	2	2	2	2	1	1	2	2	1	1	1
2	22	6	3	3	6	6	5	5	5	7	6	5	7	3	4	2	2	2	2	4	2	3	5	5	4	5	4	4	4	3	4	1	1	3	2	1	2	4	4	3	3	3	4	3	2	3	3	2	2
2	22	3	3	4	4	7	4	5	6	4	5	3	4	5	3	3	4	3	4	4	4	2	1	3	3	1	3	5	5	4	4	2	4	3	3	2	3	1	1	2	1	2	3	2	2	2	3	3	2
2	22	4	3	2	5	4	3	5	4	5	3	3	5	5	5	4	5	3	1	3	3	1	3	1	1	2	1	2	3	2	2	2	2	1	2	3	3	3	2	2	3	3	3	3	3	2	2	2	4
1	22	6	4	6	6	7	5	4	5	6	4	4	5	4	4	5	5	5	5	5	5	3	5	5	4	3	3	4	4	3	4	5	5	4	5	3	4	1	1	2	1	1	2	2	2	3	2	2	2
1	23	5	4	4	3	3	4	4	2	5	4	3	3	1	4	2	4	1	2	3	1	3	1	2	3	1	2	4	4	4	3	2	4	4	4	4	3	3	3	2	2	2	2	2	1	2	2	2	1
2	23	3	2	5	5	6	3	5	3	4	4	5	3	7	6	4	5	5	4	4	4	3	2	3	4	2	3	2	3	2	3	1	2	1	2	3	3	3	3	2	2	2	3	2	3	2	3	3	3
2	20	4	3	2	2	7	6	4	5	2	1	2	2	6	6	6	4	4	3	3	5	3	5	4	3	3	3	4	3	4	3	4	4	3	4	5	4	1	1	2	2	2	1	2	1	1	2	1	2
1	23	1	1	3	1	1	1	2	1	3	2	5	3	1	2	2	3	3	4	4	3	3	5	4	3	4	4	4	3	3	3	2	2	4	3	4	5	2	2	1	2	2	3	3	2	2	2	2	3
2	20	1	1	2	4	2	4	3	4	1	1	2	2	4	4	3	5	4	4	3	4	3	1	2	2	1	2	3	4	4	4	3	4	4	3	1	1	3	3	2	2	2	3	2	3	2	3	2	1
2	21	2	2	4	4	7	6	7	5	7	6	5	7	5	5	4	5	5	4	4	4	4	1	1	2	2	2	3	4	4	4	1	2	3	2	3	4	3	3	3	3	3	4	4	3	4	3	3	3
2	24	6	4	6	3	5	4	5	4	1	2	4	4	6	5	3	5	2	3	3	3	2	2	2	3	3	2	4	4	3	5	4	4	3	3	2	2	2	1	2	3	1	1	1	2	2	2	2	3
1	19	2	4	3	4	1	3	3	1	5	5	4	4	7	5	4	7	5	4	3	5	5	5	5	5	4	3	4	4	5	3	2	2	3	2	5	4	3	3	3	3	3	3	2	2	2	2	2	1
1	20	6	5	6	5	2	3	4	1	5	5	5	5	4	3	3	4	1	1	1	3	2	5	4	4	3	4	3	4	4	3	1	1	3	3	5	3	1	2	2	1	2	2	2	3	1	2	3	4
1	22	3	4	2	2	7	6	7	6	2	2	4	2	7	4	6	4	5	5	3	3	3	1	2	3	2	2	2	2	2	3	5	4	4	4	3	4	3	3	3	2	2	2	3	2	1	3	2	1
1	22	6	4	6	5	7	4	7	6	6	5	4	5	4	5	6	7	3	1	1	1	3	1	3	1	3	3	1	1	1	3	2	1	2	3	1	1	3	3	4	4	3	3	3	3	3	4	4	4
1	27	5	5	4	3	4	5	5	3	2	4	3	4	6	5	4	6	2	2	4	3	3	1	3	1	3	3	3	4	4	2	5	5	4	3	2	4	3	2	3	3	3	3	3	3	2	2	2	2
1	26	5	6	5	4	4	2	4	3	7	6	7	4	2	1	2	3	5	3	4	4	4	2	2	3	4	2	2	3	3	3	1	3	3	1	3	3	1	1	1	2	2	1	2	1	2	1	2	1
1	23	5	5	4	4	7	5	5	5	3	4	4	3	4	4	5	5	1	3	3	3	2	1	1	2	3	3	2	3	1	1	3	1	2	1	1	3	4	2	3	3	3	2	3	2	2	2	2	3
1	23	6	7	5	4	5	6	6	4	4	4	7	7	6	4	4	4	1	3	1	2	2	2	1	3	2	1	1	2	3	2	1	1	3	3	1	2	3	3	3	3	3	4	3	3	3	3	4	4
1	20	2	4	2	4	7	5	5	6	7	4	4	6	3	3	3	4	3	2	3	3	3	3	3	2	2	3	2	2	3	3	1	1	2	2	1	3	3	3	3	3	3	4	4	3	3	3	2	3
1	22	5	5	7	7	4	4	5	4	5	4	5	5	5	7	7	5	2	1	3	1	2	3	3	1	3	1	3	2	3	1	1	1	2	2	2	2	4	4	3	4	3	4	4	4	4	3	3	4
1	22	6	3	5	5	7	4	6	5	1	2	3	3	7	7	4	5	4	3	5	3	4	3	3	4	4	3	1	3	2	3	3	2	4	4	3	3	2	2	2	3	2	4	2	3	3	3	4	2
1	22	4	5	6	7	4	7	7	5	5	5	6	4	6	5	4	6	1	3	1	3	1	2	3	1	2	2	1	1	1	1	2	3	2	3	1	1	4	3	3	3	4	4	4	3	4	4	4	4
1	22	2	2	3	4	5	3	6	4	6	5	4	5	4	4	5	3	1	3	3	1	3	5	3	3	4	4	1	3	2	2	3	3	3	4	4	5	2	2	3	3	2	4	4	3	3	3	4	1
1	27	1	1	3	2	3	3	2	3	1	3	3	3	6	4	4	4	2	3	3	4	2	3	2	3	4	4	5	4	4	5	5	4	5	3	4	4	4	2	3	3	2	2	3	2	2	1	1	1
1	22	4	5	6	4	6	4	4	6	5	7	6	5	6	4	5	5	1	1	2	3	3	1	2	1	2	2	2	1	3	1	2	1	1	2	2	2	3	4	3	4	3	3	3	4	3	4	3	3
1	19	3	4	3	3	4	4	5	3	7	4	6	6	4	3	3	4	4	4	5	3	4	1	3	2	1	3	3	2	4	4	5	3	4	5	4	4	4	4	3	4	2	3	2	3	2	2	2	1
2	19	5	5	6	7	5	4	7	6	4	6	4	4	5	4	5	4	1	1	3	1	1	1	2	3	3	1	3	2	1	1	1	2	2	3	2	2	4	3	4	3	4	4	4	3	3	3	4	3
1	19	4	3	4	2	5	5	6	5	5	5	5	3	2	1	4	3	1	3	2	2	1	3	3	2	1	1	3	3	1	2	1	1	3	3	3	1	3	2	3	2	3	1	2	1	1	2	1	4
1	26	2	3	3	1	7	5	6	7	7	7	7	4	4	4	3	3	5	5	4	4	4	1	2	3	1	3	3	4	2	3	5	5	3	4	2	2	3	3	3	2	3	1	2	2	2	2	2	2
1	24	6	3	4	3	7	6	7	4	1	3	3	2	2	4	4	2	1	2	3	3	2	5	4	5	3	4	3	3	2	4	2	4	2	4	5	3	3	2	3	2	3	3	3	3	3	3	3	4
2	22	3	2	5	3	2	3	4	2	4	5	5	4	6	6	5	5	4	3	4	5	3	2	4	3	3	3	4	4	3	4	2	2	4	2	5	4	2	2	2	2	2	1	2	2	1	2	1	3
2	20	3	3	5	5	2	3	4	4	2	1	3	3	5	6	5	6	5	5	3	4	5	5	5	4	5	5	2	2	2	2	2	2	3	4	5	4	1	1	1	2	2	2	2	3	1	2	1	4
1	21	4	5	7	6	5	5	5	7	7	6	6	4	6	4	6	6	1	3	2	3	1	1	1	1	3	2	2	1	1	1	1	2	1	1	3	3	4	4	3	4	4	3	4	4	3	3	3	3
2	23	6	4	3	4	1	3	2	3	5	5	5	3	1	1	1	2	4	4	3	3	3	4	4	3	5	5	2	4	3	4	3	2	3	2	1	3	4	4	4	3	3	4	4	3	4	4	4	3
2	24	3	2	5	3	6	5	4	6	6	3	5	5	4	4	3	5	5	5	3	3	3	2	2	4	4	3	5	3	3	4	1	3	2	3	2	4	1	1	1	1	2	2	3	3	3	2	3	4
1	20	3	3	4	5	4	5	3	3	5	3	4	6	1	1	2	3	5	3	4	5	4	5	5	3	4	3	1	2	3	2	3	2	4	4	4	3	2	2	2	3	2	4	4	4	3	4	3	2
2	20	4	5	5	4	3	2	4	3	6	5	3	5	6	4	6	3	1	1	3	2	1	3	3	3	2	4	1	2	3	2	3	3	4	4	4	3	3	2	2	3	2	1	2	2	1	1	1	1
1	24	6	7	7	6	7	5	6	4	7	5	4	4	7	6	4	4	2	1	1	2	2	1	3	3	3	1	1	3	2	2	2	2	3	3	2	2	4	4	4	4	3	3	3	3	3	3	3	3
1	21	4	4	3	5	1	2	2	3	3	2	4	2	1	2	2	1	5	5	5	4	4	4	4	4	4	4	4	5	3	3	4	4	5	3	5	3	1	1	1	1	1	2	2	3	2	3	3	4
1	24	4	4	7	7	7	5	6	4	5	5	7	5	5	7	6	6	1	1	3	2	1	1	2	3	2	1	1	2	2	2	2	3	1	2	1	3	4	4	3	3	3	3	4	3	4	4	4	4
1	22	5	6	5	6	5	4	3	4	2	2	4	4	1	2	3	4	4	3	3	3	3	3	4	2	3	3	3	4	3	2	5	5	4	4	4	5	2	2	1	2	3	4	2	3	4	2	3	4
1	20	2	2	4	4	4	3	5	3	3	2	4	3	2	2	1	2	2	3	3	2	3	4	4	5	3	3	1	1	3	3	5	5	4	4	1	3	3	3	4	4	3	4	4	4	4	4	3	4
1	21	2	2	3	4	6	4	6	5	1	3	1	2	2	1	4	3	1	3	3	3	2	2	2	2	2	2	3	4	3	4	3	2	4	3	5	4	4	3	3	2	3	2	2	3	3	2	2	2
1	22	6	5	4	6	4	4	4	5	6	5	6	5	7	6	4	6	1	3	1	1	2	2	2	3	4	2	4	5	5	3	3	4	2	4	3	4	4	3	2	3	2	2	1	2	2	3	2	1
1	23	5	4	3	3	6	5	4	4	2	1	3	2	6	5	6	4	2	2	4	4	4	2	4	3	2	3	3	2	4	3	2	3	2	2	4	4	2	2	2	2	2	1	2	1	1	1	1	4
1	22	4	3	3	4	6	4	5	4	2	3	3	1	1	1	2	1	5	5	5	4	5	4	4	5	4	4	3	3	3	3	4	5	3	3	3	3	4	3	4	3	3	2	3	2	1	3	2	3
1	21	7	4	6	6	6	5	7	4	5	7	5	7	5	7	4	7	1	3	3	2	3	3	3	3	3	1	1	3	2	2	3	3	2	3	1	2	4	3	4	3	4	4	3	4	3	3	3	4
1	23	1	2	2	1	1	2	1	4	3	4	5	5	1	3	2	1	5	4	4	4	5	1	2	2	3	2	2	3	3	2	2	4	2	2	4	3	4	3	2	2	4	1	1	1	1	1	1	2
1	18	4	2	3	3	5	5	6	3	3	2	2	2	4	2	3	2	2	2	3	2	3	2	3	2	2	2	4	3	4	5	1	2	3	3	5	4	2	2	2	2	2	2	2	2	1	2	3	4
1	20	4	2	4	5	3	2	5	4	1	4	3	2	6	4	3	5	1	2	2	3	3	2	2	4	3	2	2	2	3	2	2	2	3	2	4	4	3	2	2	3	3	4	3	3	3	2	4	2
1	24	6	6	4	4	3	3	3	4	6	5	6	3	3	3	5	5	5	3	4	4	5	3	3	4	4	2	5	4	4	3	2	4	4	3	3	3	2	3	2	1	3	3	2	3	3	3	3	1
1	22	3	5	5	5	2	3	4	1	3	4	4	5	1	4	1	3	4	4	4	5	4	4	3	5	3	3	3	4	2	4	2	2	3	3	5	3	3	3	3	3	4	4	3	3	3	4	3	4
1	23	2	2	4	4	7	7	4	6	2	4	1	4	4	5	5	2	2	3	2	3	3	5	4	3	5	5	4	5	3	3	2	3	2	4	2	2	3	2	3	2	2	1	2	2	2	1	2	2
2	20	1	1	3	1	6	4	4	4	5	4	5	6	4	4	4	3	2	4	3	3	3	2	4	4	4	3	5	3	3	4	1	2	3	1	1	1	3	3	2	2	2	2	3	2	3	2	2	2
2	23	7	5	7	6	4	7	7	4	7	5	5	4	6	4	6	5	1	3	2	2	1	3	2	3	1	1	2	2	3	1	2	2	2	2	1	3	4	4	3	4	4	4	4	4	3	3	3	3
2	20	6	5	6	5	6	6	6	5	1	3	4	3	2	4	2	3	3	4	3	4	4	3	3	3	4	4	4	4	4	3	4	4	4	5	2	2	4	3	3	2	3	3	3	2	2	3	3	2
1	23	7	6	7	4	6	4	6	5	6	6	4	5	6	4	4	7	2	2	2	4	2	4	5	5	3	4	2	3	2	3	5	4	4	5	1	3	3	3	2	2	3	1	2	2	1	2	2	4
2	20	7	5	5	4	3	4	2	3	6	4	5	4	7	4	5	5	4	4	3	3	4	2	3	4	3	2	1	3	3	3	4	3	3	5	5	4	4	2	2	3	4	1	1	2	1	1	2	1
2	21	3	5	4	5	7	7	4	6	1	4	4	1	5	5	5	3	1	3	3	2	2	3	3	3	4	3	4	5	4	3	3	3	2	4	2	3	3	3	2	3	3	3	3	3	3	2	3	1
2	24	2	3	4	3	6	6	3	5	1	2	3	4	1	3	2	2	2	3	2	2	2	2	1	2	2	3	1	3	3	3	2	1	3	2	2	3	3	3	3	2	3	2	2	3	2	2	3	2
1	19	7	7	4	6	6	4	6	4	6	6	6	5	5	5	6	6	3	3	3	2	3	4	4	4	5	3	2	2	3	3	1	2	2	3	5	5	4	4	4	3	4	3	3	3	3	4	3	4
2	22	7	5	6	6	4	2	4	4	3	2	5	3	7	6	4	5	5	3	3	5	5	1	3	2	1	2	3	3	3	4	2	2	3	3	5	3	4	4	3	3	3	3	2	3	2	2	2	3
1	23	6	5	3	6	6	4	6	4	2	3	3	3	7	4	6	5	2	2	2	3	3	3	3	4	3	3	5	4	5	5	3	2	3	4	4	3	4	3	4	2	2	2	3	3	2	2	3	3
1	24	7	4	7	4	5	6	6	7	5	5	7	5	7	6	7	6	3	3	4	2	4	1	1	1	2	2	1	2	1	2	5	4	4	3	3	4	3	2	2	2	3	1	1	1	1	1	1	1
1	23	2	4	4	4	5	4	3	4	4	5	3	4	4	3	4	5	1	2	2	2	3	2	3	3	4	4	3	4	3	4	1	2	3	3	4	4	2	2	2	2	1	4	3	3	3	4	3	2
2	24	6	3	5	6	2	3	1	3	3	2	3	4	5	4	5	5	2	4	2	4	3	2	2	2	2	2	5	5	3	5	1	3	3	2	1	3	3	3	4	4	3	3	4	3	3	4	4	4
1	21	3	5	2	5	6	4	6	4	3	3	4	3	4	3	5	3	2	1	2	2	2	2	1	2	1	1	3	2	2	1	1	2	2	1	3	3	3	4	4	3	3	4	3	3	3	4	4	4
1	20	7	6	7	6	4	3	5	3	7	5	5	6	3	4	2	4	3	4	2	4	4	1	1	3	2	2	5	4	5	5	1	3	3	3	5	4	4	3	2	2	3	3	2	3	2	3	2	1
1	18	2	3	2	4	1	3	2	1	5	3	4	4	4	5	2	4	1	1	2	3	3	3	2	3	4	3	4	3	5	3	1	1	3	2	5	5	1	1	1	1	1	3	2	3	3	2	2	1
2	24	7	4	5	5	6	4	5	5	2	1	2	3	6	3	5	3	1	2	2	2	3	4	3	3	4	3	3	4	2	2	4	3	5	5	2	3	2	1	2	2	2	2	3	2	2	3	1	1
1	22	5	5	4	3	6	4	4	5	7	6	6	4	5	6	5	4	1	1	1	2	1	1	2	2	1	2	2	2	2	1	3	1	1	3	3	3	2	3	3	1	2	4	2	3	3	3	2	1
1	23	7	6	4	7	5	5	5	4	6	7	7	7	5	6	7	7	5	4	4	4	5	2	3	4	3	2	1	2	2	3	3	3	4	3	3	3	1	2	1	2	1	2	1	3	3	2	2	4
2	24	6	4	5	4	2	3	2	4	5	5	5	3	6	4	3	5	3	4	4	2	2	4	4	3	3	4	4	3	4	3	4	5	3	3	5	4	4	3	2	2	3	4	4	2	3	2	2	4
1	23	6	4	4	4	4	4	5	4	4	4	4	3	6	4	5	4	1	3	1	1	3	5	4	5	4	3	1	3	2	3	2	4	4	2	1	2	2	1	2	2	2	1	2	1	2	2	1	2
2	21	5	4	3	3	1	3	3	3	6	6	6	5	5	5	3	4	1	2	3	3	3	3	4	3	3	4	2	2	2	3	2	2	4	2	1	3	2	2	1	1	2	2	1	3	2	2	2	4
1	25	7	6	4	5	2	3	3	3	4	5	5	2	4	3	4	3	3	1	1	1	1	2	2	3	1	2	2	3	1	3	1	2	1	2	1	2	4	3	4	3	4	3	3	4	3	3	3	4
1	24	5	5	5	3	1	3	3	2	4	4	3	4	3	2	4	4	5	4	3	4	5	4	3	4	4	4	5	3	3	4	4	3	4	3	5	4	4	2	3	3	2	3	3	2	2	3	3	4
2	19	4	5	4	4	6	4	5	6	5	6	3	3	3	3	3	2	1	3	2	3	3	3	2	4	4	4	5	4	5	4	4	4	4	4	2	2	2	2	2	2	1	4	3	2	3	4	4	3
1	21	4	5	3	3	5	4	5	5	2	4	2	1	4	4	4	3	1	2	2	2	2	2	2	4	3	3	1	3	2	1	3	2	3	3	3	4	1	1	1	1	2	3	3	3	2	2	3	3
1	26	7	5	7	7	6	6	4	5	6	6	7	7	6	7	6	4	2	2	1	1	3	1	3	3	3	1	3	1	2	2	2	2	3	3	2	2	3	4	4	3	4	4	3	4	3	4	3	4
1	25	6	6	5	3	4	2	3	4	2	2	1	1	1	3	2	3	5	5	5	4	5	5	5	3	3	5	3	3	3	3	5	5	3	5	5	4	2	2	2	1	2	3	2	3	3	2	2	2
2	24	5	6	6	6	7	5	7	5	4	7	4	7	6	6	6	6	3	3	3	3	4	1	1	1	3	2	1	2	2	2	1	3	3	2	2	2	4	4	3	4	4	3	2	3	2	3	2	3
1	26	7	4	4	5	6	4	6	4	6	6	6	6	6	3	5	6	3	4	3	3	2	3	3	3	4	4	5	4	5	3	4	3	3	5	5	3	3	2	2	2	2	3	3	2	3	2	2	4
2	24	2	1	2	1	5	4	3	3	5	5	3	3	4	2	3	2	2	3	2	4	2	1	1	2	3	3	3	4	4	4	4	3	3	3	2	4	3	2	2	2	3	4	2	2	3	2	2	3
1	22	1	2	2	4	1	4	2	2	1	3	2	4	3	2	4	4	3	4	2	3	4	3	4	3	4	2	3	3	4	4	5	5	5	5	5	4	1	2	1	1	1	4	3	2	2	4	3	3
1	22	1	2	1	3	3	2	5	3	4	3	5	4	6	5	4	6	1	3	1	2	2	1	1	2	1	3	1	2	1	3	2	2	2	1	2	2	3	3	3	3	3	4	4	3	3	4	3	4
1	21	2	4	2	3	4	5	5	4	5	3	6	3	5	3	3	4	1	3	1	1	3	1	3	3	2	2	2	1	2	2	2	2	3	1	1	3	4	3	4	4	3	2	3	3	2	1	3	3
2	23	6	6	6	5	5	5	4	6	2	3	3	3	3	2	4	4	5	5	4	3	5	4	4	3	3	4	1	2	3	2	1	2	2	2	5	4	1	2	2	2	1	2	3	2	3	1	3	1
2	19	4	4	5	4	7	4	4	5	7	4	4	4	4	4	7	5	1	1	2	1	3	3	3	2	2	1	2	3	2	1	1	2	1	1	1	1	3	4	3	4	3	3	3	4	3	4	4	4
2	20	6	6	5	4	2	2	2	2	5	4	4	5	5	4	5	4	1	2	2	3	3	3	2	3	4	3	5	4	4	4	5	4	5	4	2	3	3	2	3	2	2	4	4	4	4	3	3	2
1	22	4	5	7	5	7	4	5	7	5	4	6	5	7	5	6	4	2	2	2	1	2	1	1	2	3	2	3	1	2	1	2	3	2	2	2	1	4	4	4	4	4	4	4	3	3	4	4	3
1	25	7	6	4	5	3	2	4	4	2	4	3	4	3	2	2	3	2	4	2	3	2	2	2	3	2	2	2	2	3	2	1	1	1	2	1	3	4	4	3	3	3	2	2	2	2	2	3	4
2	23	1	2	2	3	2	3	2	4	6	5	4	3	4	5	4	5	3	3	3	3	4	3	4	4	4	4	1	1	1	1	3	4	3	3	1	2	2	1	2	2	2	2	1	3	2	3	2	2
2	26	3	2	5	3	1	4	3	3	1	2	3	4	7	5	4	5	3	4	4	2	3	2	4	3	3	3	5	5	5	4	1	2	1	3	3	3	3	2	3	2	3	1	1	2	1	2	1	2
2	22	7	6	6	5	7	5	7	5	6	7	5	5	5	5	5	6	1	2	2	1	3	3	3	3	3	1	1	2	2	1	1	2	3	2	2	2	1	2	1	2	1	1	1	1	2	2	1	4
2	22	2	3	4	4	4	4	4	2	1	1	2	3	2	1	2	4	2	2	3	2	2	2	2	3	3	3	3	3	3	2	2	3	4	3	4	3	3	3	2	3	2	1	1	1	1	1	2	1
2	21	5	5	4	6	4	4	3	4	1	2	3	1	7	4	5	4	1	2	3	2	3	1	3	2	1	2	3	3	1	2	3	1	1	1	1	3	4	3	4	3	3	3	2	2	2	2	2	3
1	22	6	6	5	4	5	6	5	7	6	6	4	7	4	5	4	5	2	1	2	3	2	3	3	3	1	3	1	3	2	1	1	2	3	3	2	2	4	4	4	3	3	3	3	3	3	4	4	4
1	22	3	2	4	4	3	2	3	5	4	5	4	2	4	3	5	5	1	2	3	1	3	1	2	1	1	1	2	2	2	3	2	2	2	3	1	2	2	2	1	2	1	1	2	1	1	1	1	1
1	25	6	7	5	5	6	4	4	6	6	7	5	6	7	6	4	6	2	2	2	4	2	1	1	3	2	2	2	3	2	3	2	4	3	3	1	2	2	3	1	2	1	2	2	2	2	2	2	3
1	26	2	3	3	2	6	4	6	3	3	2	2	2	1	1	1	1	3	2	4	3	3	1	1	3	2	1	1	3	3	3	5	3	4	3	5	4	4	4	3	3	3	3	2	3	3	3	3	2
1	22	5	4	3	5	5	4	3	3	6	3	4	3	6	4	3	3	4	4	4	5	3	3	4	3	2	3	2	3	2	3	2	3	4	2	4	3	1	2	1	1	2	3	2	3	3	2	2	3
1	22	3	3	4	2	2	4	3	4	2	3	3	3	3	4	4	4	1	3	3	2	3	1	1	3	2	3	5	5	3	4	1	3	1	2	4	5	4	2	2	3	2	4	3	4	3	3	4	3
1	22	4	3	2	5	2	4	1	3	6	4	6	3	3	4	4	5	4	4	4	3	5	2	3	3	3	4	2	2	3	2	5	4	5	4	4	3	1	1	1	1	1	1	1	2	2	2	1	3
1	22	7	6	7	7	7	6	4	5	7	7	4	7	7	6	7	7	3	3	3	3	3	2	2	3	2	2	1	1	2	3	1	1	1	1	2	3	4	4	4	4	3	3	3	4	3	3	3	3
1	20	6	6	3	6	6	4	4	4	2	3	3	2	6	3	3	4	5	3	4	5	5	5	5	4	5	5	2	3	3	2	3	2	2	4	3	3	1	1	1	2	2	3	3	3	2	2	3	4
1	23	7	5	6	7	7	5	6	4	7	7	6	6	6	7	5	4	2	3	2	2	2	2	3	1	2	2	1	3	2	2	2	2	1	1	2	2	3	4	4	4	3	4	4	4	3	4	3	3
1	23	6	6	4	4	7	4	6	4	7	7	6	4	6	6	6	4	3	3	1	1	1	2	2	1	1	1	3	3	2	1	1	1	3	1	2	3	3	4	4	3	3	4	4	4	4	4	3	3
1	25	3	5	3	4	6	4	4	5	6	5	4	3	5	5	5	6	2	3	2	3	2	3	2	2	4	3	4	4	5	3	1	1	1	2	3	4	3	3	3	4	3	4	4	4	4	4	3	3
2	20	7	5	5	6	4	5	6	5	5	5	7	5	7	4	4	7	1	2	3	2	3	3	3	2	4	4	5	4	3	5	4	3	3	4	2	3	4	3	2	2	3	1	2	1	2	2	2	1
2	22	7	5	4	5	7	7	5	5	7	7	6	7	5	6	7	5	3	1	1	1	1	2	2	1	3	3	1	3	1	3	1	2	2	2	2	2	4	4	4	4	4	4	3	4	3	4	3	4
1	20	7	7	5	6	5	5	6	4	5	6	5	5	7	5	7	4	1	1	3	1	3	2	2	1	1	2	1	3	3	3	2	2	1	3	3	1	4	3	3	4	3	4	3	4	3	4	4	3
1	20	7	5	6	4	3	2	3	3	7	6	6	6	5	5	5	5	2	4	3	2	2	1	3	1	2	1	5	3	5	4	1	1	2	3	3	4	1	2	2	1	1	1	2	2	2	2	2	3
2	18	2	2	4	1	3	3	3	4	7	6	5	4	6	5	5	6	4	3	4	3	5	5	4	5	4	5	5	3	5	4	5	4	5	3	2	2	4	2	3	3	3	2	3	3	2	2	1	1
1	19	2	3	2	2	3	5	5	3	2	4	4	4	3	2	4	5	1	1	2	1	3	2	2	2	2	4	4	5	3	4	5	4	4	4	4	3	2	2	2	2	2	3	3	2	3	3	2	4
2	18	4	5	3	4	5	5	3	5	1	3	1	2	1	3	1	4	1	3	2	3	3	1	3	3	3	3	3	4	3	4	1	2	1	3	4	4	4	2	3	3	2	3	2	3	2	3	2	2
2	19	3	4	2	2	3	3	4	2	3	2	3	3	5	3	3	3	1	2	3	1	3	1	3	3	2	1	3	3	3	2	2	3	3	2	1	3	1	2	2	1	1	3	2	2	2	3	2	3
1	20	4	5	4	3	5	5	3	4	6	5	6	4	4	2	5	5	2	4	3	2	2	1	2	1	1	2	3	2	4	4	5	3	4	4	4	3	1	1	2	1	1	2	1	2	2	2	2	2
1	18	7	4	6	5	3	3	3	3	3	3	2	2	2	1	2	2	5	5	3	4	4	3	4	4	4	3	1	1	1	3	2	4	2	2	2	3	2	3	2	1	2	4	3	3	3	3	4	2
1	20	6	4	4	3	1	2	3	2	6	5	6	4	5	5	6	3	2	2	3	3	3	5	4	3	5	5	3	3	4	4	3	2	3	3	3	4	2	2	3	1	2	1	1	1	2	1	2	1
1	19	1	1	1	3	4	4	3	4	4	3	3	3	3	2	3	4	4	4	3	3	4	1	2	1	3	3	2	2	2	2	3	2	4	4	5	5	3	2	2	2	2	1	1	1	2	2	1	4
2	19	3	3	5	3	7	5	4	6	5	5	4	3	4	3	5	5	4	5	3	3	4	2	3	2	4	3	1	1	2	2	2	3	2	2	4	4	1	2	1	2	1	3	3	2	2	2	2	3
1	20	5	3	3	6	2	3	4	2	2	3	3	3	7	5	4	4	1	2	1	2	1	4	3	3	4	3	1	3	3	2	5	4	3	4	5	5	3	2	2	3	3	1	1	1	2	1	2	4
1	19	2	2	4	2	5	5	6	4	7	4	6	6	7	4	4	4	1	1	2	3	2	3	1	2	1	3	2	1	1	2	2	1	2	2	2	2	1	1	1	2	2	3	2	2	2	3	3	2
1	21	6	3	3	4	7	7	4	4	3	4	2	3	6	6	6	5	5	5	5	5	5	3	3	2	2	4	3	4	4	4	1	3	3	3	4	3	4	4	2	2	2	4	4	4	3	3	4	2
1	18	3	3	2	5	6	6	4	5	7	6	4	7	4	3	5	4	4	5	3	4	4	2	2	3	4	3	3	3	2	4	5	5	5	5	3	3	2	2	2	2	2	2	2	2	1	1	1	3
1	19.25	6	4	5	5	6	6	3	6	4	5	4	3	6	6	6	5	3	4	4	3	2	1	3	2	2	3	2	2	4	2	2	2	4	3	4	4	1	1	2	2	1	1	2	2	1	1	2	2
2	18	2	2	3	2	6	6	6	6	2	4	4	4	3	4	3	4	3	2	3	3	3	1	1	3	3	2	5	4	5	4	3	2	3	3	4	3	1	2	2	1	2	1	1	2	1	2	2	2
1	20	5	5	4	6	5	6	7	5	7	6	7	4	7	5	7	5	2	2	4	3	4	2	2	2	2	2	1	2	2	3	1	2	2	2	3	4	2	2	1	1	1	2	2	2	1	2	2	1
1	19	1	1	4	2	5	5	3	5	5	3	6	4	1	1	1	2	4	3	4	4	3	3	2	4	3	3	5	4	5	3	3	3	4	3	1	3	2	1	2	2	1	3	3	3	2	2	2	2
2	19	7	4	5	4	3	2	5	4	5	5	4	5	1	1	3	2	1	3	1	3	2	3	2	3	4	3	4	5	3	3	1	2	2	2	3	4	1	2	2	2	2	4	2	3	4	3	3	4
1	20	2	4	4	3	4	2	2	4	6	4	4	5	2	1	1	3	5	4	5	4	5	5	4	5	4	5	1	3	3	2	4	3	4	5	4	3	1	2	1	2	2	4	3	3	3	2	2	4
1	19	1	3	1	1	5	5	4	6	5	6	5	4	3	2	4	4	3	1	2	2	1	2	3	3	1	3	1	3	2	1	1	1	1	2	2	1	4	4	3	4	4	4	3	3	3	4	4	3
2	19	7	6	5	7	6	6	6	5	5	6	6	7	7	4	7	6	2	1	1	2	1	1	1	1	3	2	1	1	1	2	2	3	3	3	1	1	3	4	4	4	4	4	4	3	3	3	4	4
2	19	4	2	5	3	5	4	5	5	3	3	4	4	4	4	3	4	2	2	3	2	2	5	5	3	3	5	2	2	2	2	1	2	3	3	5	3	4	4	3	3	3	4	3	4	3	4	4	3
2	19	6	4	4	3	4	3	5	4	7	6	6	5	4	4	5	5	1	3	1	1	1	2	3	3	2	3	2	2	1	3	1	3	3	3	1	3	4	2	2	3	3	2	2	3	2	1	1	1
2	20	6	4	6	3	1	3	1	1	5	6	3	5	5	4	4	3	1	3	3	3	3	2	1	3	3	3	3	3	1	3	1	2	3	2	1	1	2	2	2	2	3	3	2	2	2	3	2	1
2	19	5	5	5	5	6	6	4	5	6	7	6	4	7	6	5	5	2	2	3	1	3	2	1	2	2	2	1	1	2	3	1	3	3	2	2	2	3	3	3	3	3	3	4	4	4	3	3	4
1	19	6	6	5	6	2	4	2	3	5	3	3	4	3	3	2	5	2	4	3	2	2	3	2	4	2	4	1	2	3	2	1	2	3	3	1	3	1	2	1	2	2	3	2	2	3	3	3	4
2	20	7	5	7	4	5	4	3	3	3	2	2	4	5	4	5	5	1	2	3	3	1	2	2	1	2	1	2	2	2	2	2	2	3	3	2	2	1	2	1	2	1	4	4	4	3	3	3	3
1	19	5	3	5	3	2	2	4	3	3	5	4	5	4	4	3	3	2	3	2	2	3	1	2	3	1	2	5	5	4	3	5	5	3	5	1	2	1	2	2	2	2	1	1	1	2	2	1	2
1	20	1	3	1	1	7	6	4	5	1	2	3	2	6	6	4	3	2	1	2	1	2	1	1	2	3	3	3	1	3	3	1	3	3	3	2	2	4	4	3	4	3	4	3	3	3	4	3	3
1	21	6	5	4	3	1	3	4	3	5	5	6	3	2	1	1	4	3	4	3	3	3	4	3	3	5	3	4	5	4	4	1	3	2	2	1	3	2	3	2	2	1	3	2	3	3	3	3	4
2	18	2	4	1	1	4	4	2	5	4	5	5	3	2	2	2	1	2	4	3	2	3	3	4	2	3	4	4	4	3	3	1	3	3	2	3	2	3	4	3	3	3	4	4	4	4	4	3	4
2	19	5	4	5	5	7	7	6	5	7	4	4	6	3	2	4	3	3	4	4	4	4	1	3	3	1	2	5	3	3	4	3	4	3	3	5	5	3	3	3	3	2	1	2	2	1	2	2	2
2	20	6	4	6	6	3	3	4	4	2	4	3	1	3	4	4	2	5	3	4	5	4	1	3	2	2	1	4	3	3	3	2	2	4	2	2	2	3	2	2	2	2	4	3	3	3	4	2	2
2	20	1	1	3	4	6	4	5	4	4	5	4	4	2	2	2	2	1	2	3	3	3	3	4	4	4	4	5	4	5	5	4	4	3	4	1	2	2	1	3	2	3	2	1	2	1	3	1	4
1	19.75	6	3	6	6	5	4	6	4	3	4	3	5	3	4	2	5	3	4	4	4	4	2	2	4	2	4	5	5	4	3	3	4	4	4	5	4	3	3	2	2	3	1	1	1	1	1	1	2
2	20	5	3	3	5	6	5	3	4	1	3	1	2	2	3	1	4	1	3	1	3	3	1	3	1	2	1	2	1	1	3	2	1	2	1	2	3	1	2	1	1	2	1	1	2	2	2	1	3
2	20	3	4	2	4	3	3	4	2	1	2	1	4	5	3	3	4	4	4	5	5	4	1	2	2	3	3	1	1	2	2	3	4	4	3	4	4	4	4	3	3	3	3	3	3	3	3	3	4
2	20	7	6	6	4	7	4	6	6	7	7	7	7	6	5	5	4	1	1	3	3	1	2	2	1	2	1	1	3	2	2	1	1	3	1	1	2	4	4	4	4	3	4	3	4	4	4	3	4
2	21	4	4	5	5	3	2	2	4	6	3	6	4	4	2	5	4	3	4	3	4	3	1	2	1	1	2	1	3	3	2	1	3	2	2	3	2	3	2	2	2	2	2	2	2	3	2	2	4
2	19	7	6	6	6	2	3	3	4	7	7	7	4	6	4	5	5	3	3	3	1	3	2	2	1	3	2	2	1	1	3	2	3	1	3	3	1	3	2	2	2	2	4	3	3	2	3	2	2
1	20	1	3	3	3	3	4	2	4	4	5	4	2	2	2	3	2	5	4	4	5	3	2	4	3	2	2	2	2	2	2	1	1	2	3	3	4	1	2	1	2	2	4	3	3	2	4	2	3
1	19	6	5	5	4	2	3	3	3	5	3	5	5	5	4	3	3	1	2	3	1	1	2	3	3	3	3	3	4	4	2	2	3	3	2	4	4	3	2	2	2	3	2	1	3	1	2	3	1
2	18	6	4	6	5	5	4	5	4	3	2	4	5	2	2	3	4	1	3	2	1	2	5	3	3	4	4	2	3	2	3	5	4	5	4	4	4	2	2	3	3	1	1	1	1	2	1	1	4
2	20	4	4	4	4	7	4	4	7	5	5	6	5	4	4	4	5	3	4	3	3	2	4	4	4	4	4	1	1	3	1	1	2	1	3	4	4	3	2	3	3	3	2	1	3	2	2	2	2
1	21	5	5	5	7	7	5	4	5	7	6	6	6	6	7	7	6	3	4	2	2	4	4	3	5	4	3	1	1	3	2	4	5	3	5	5	4	4	3	2	3	3	2	1	2	2	2	1	2
1	20	4	3	4	3	5	5	5	5	6	5	6	6	2	2	3	4	2	2	2	4	3	5	5	5	5	3	2	2	4	3	4	5	5	3	4	4	3	2	2	2	2	2	1	3	2	2	2	3
1	19	3	4	4	3	1	2	2	3	4	3	5	3	7	6	6	5	1	2	3	3	1	2	4	3	2	2	3	2	3	2	4	5	3	4	1	2	3	3	2	2	2	2	1	1	1	1	1	1
1	19	3	4	2	2	7	5	6	6	7	4	6	4	5	6	3	6	4	4	4	3	4	2	3	4	2	2	2	2	4	2	4	3	5	5	4	4	3	2	2	2	3	4	4	3	3	4	4	3
1	19	1	4	1	2	6	5	6	5	5	4	6	3	4	3	4	4	1	3	3	1	1	2	3	2	3	2	2	2	4	3	3	4	4	4	3	3	3	3	2	3	2	2	3	3	2	2	1	4
2	20	3	2	3	3	7	4	5	6	1	2	3	1	7	7	4	5	5	5	4	5	5	5	4	3	4	5	2	4	4	2	5	4	3	3	3	4	1	2	2	1	1	1	2	1	1	2	1	2
2	20	4	4	4	5	2	2	3	2	5	3	4	6	1	2	2	2	2	2	3	4	3	3	3	2	3	2	3	4	4	2	3	4	4	2	5	4	2	1	1	2	3	4	3	3	2	2	2	1
2	20	5	4	4	4	2	3	3	1	7	4	7	5	4	5	4	5	1	3	1	1	1	3	3	3	3	4	3	4	4	3	2	4	4	3	3	4	3	3	4	3	4	3	3	3	4	3	4	4
2	20	6	5	6	5	7	6	6	5	6	6	6	6	3	2	4	2	5	5	4	4	4	2	3	3	4	4	2	2	4	2	4	5	3	3	3	2	2	2	2	1	2	1	2	2	2	2	1	4
2	19	5	6	4	5	6	6	4	7	5	5	5	4	5	4	5	4	2	2	2	2	2	3	1	1	1	1	1	1	3	3	3	1	1	3	1	2	4	3	3	4	4	4	3	3	4	4	3	4
2	21	5	4	3	4	3	2	3	5	4	3	4	3	6	5	4	4	1	1	2	1	2	3	3	3	1	1	3	1	1	3	3	1	3	1	2	1	1	1	2	1	1	2	1	2	1	2	1	2
1	20	7	6	6	7	5	7	4	7	5	5	5	4	7	4	6	7	5	3	3	4	5	3	4	2	3	3	3	4	3	3	1	2	2	3	3	4	3	3	3	2	3	4	3	3	4	3	2	2
2	20	3	4	3	3	5	5	4	4	7	6	6	4	7	6	6	7	2	2	2	2	3	2	3	2	2	3	2	3	2	2	2	2	2	2	1	1	4	3	3	4	2	2	2	3	3	3	2	1
2	20	5	4	5	3	5	4	3	6	6	6	5	4	4	4	3	4	3	4	4	3	3	1	2	2	3	3	2	3	4	3	1	2	3	2	1	1	2	1	3	3	2	4	3	3	3	3	3	1
2	20	4	2	2	4	7	5	6	5	3	4	3	5	6	3	5	5	2	3	2	4	3	1	1	3	2	3	2	3	4	4	5	3	3	4	5	3	3	3	3	3	4	4	4	3	4	4	4	4
2	20	2	2	2	4	7	4	4	4	5	4	5	5	7	4	7	4	1	1	2	3	2	3	4	4	3	4	3	3	3	3	5	4	3	3	2	3	2	1	2	3	2	4	4	3	4	3	3	4
2	19	5	3	3	5	1	1	4	2	3	5	3	2	4	3	4	4	2	2	3	3	3	2	2	3	2	2	4	4	4	3	3	2	3	3	5	5	4	3	3	3	4	3	2	3	3	3	2	2
2	19	7	5	6	4	4	3	5	5	4	2	4	4	5	3	6	5	2	2	3	3	3	1	3	2	2	2	5	3	4	5	3	4	4	4	3	2	3	2	3	2	3	3	2	2	2	2	3	4
2	19	1	4	1	3	3	5	3	3	3	4	3	3	5	5	4	3	3	4	4	2	3	5	4	5	3	3	1	3	2	2	3	4	4	2	1	2	3	2	3	3	3	4	3	2	2	2	2	3
2	20	7	5	6	6	7	6	6	4	1	3	3	1	2	2	1	4	1	3	3	3	2	5	3	4	4	4	3	4	4	4	4	3	5	3	4	4	4	2	2	3	3	2	2	3	2	2	2	1
2	19	4	4	4	5	4	4	5	3	6	6	5	3	4	5	3	3	5	4	3	5	4	2	2	4	3	3	3	3	3	2	2	2	3	3	1	2	4	3	3	4	4	4	3	2	2	2	3	4
2	20	2	2	2	3	4	5	4	4	1	4	1	1	5	3	4	5	5	3	4	4	5	4	4	4	3	4	4	3	3	3	1	3	3	3	4	3	2	2	3	2	2	1	1	2	1	2	2	2
2	20	1	3	3	3	3	4	5	4	6	6	4	6	1	1	3	4	1	3	2	3	1	2	2	2	3	2	4	3	5	4	2	4	4	2	1	2	4	4	4	4	4	3	3	4	3	4	4	3
2	20	7	6	7	7	6	6	7	6	6	7	5	7	4	5	5	5	2	3	2	4	3	4	3	5	3	4	1	2	2	3	4	3	3	4	1	2	2	3	3	2	2	4	3	2	3	3	3	3
1	20	3	4	5	4	3	4	5	4	1	4	1	2	4	2	5	3	5	4	4	3	4	4	5	4	4	5	3	4	3	3	1	2	3	3	5	5	1	2	1	2	2	1	2	2	2	2	2	4
1	20	1	1	2	3	2	2	1	3	6	6	6	4	5	4	5	3	5	4	5	3	4	4	4	3	4	4	3	4	3	4	3	4	4	3	2	3	1	1	1	2	1	4	3	2	2	2	2	1
1	20	4	4	4	5	3	2	2	2	2	2	2	3	5	3	3	4	2	4	2	2	2	2	3	3	3	4	3	3	4	4	2	3	4	4	5	5	3	3	2	2	2	2	3	2	1	3	3	4
1	20	4	3	5	3	1	1	1	4	2	4	4	2	3	5	5	3	1	1	3	1	2	3	3	3	2	3	2	2	2	1	2	1	3	1	2	2	2	2	2	2	3	1	1	2	2	1	1	4
1	20	2	1	1	4	2	4	2	3	7	4	4	4	1	1	1	3	2	3	2	2	3	2	2	3	4	2	3	3	2	3	2	2	3	3	5	4	3	2	2	3	3	1	1	2	1	1	2	1
1	19	4	2	5	4	6	3	6	5	6	6	5	3	7	7	4	6	4	3	3	4	3	1	1	3	3	3	2	3	4	3	4	3	4	5	1	2	3	3	3	3	2	3	3	2	2	2	2	2
1	20	7	7	5	5	4	3	5	5	6	5	6	3	5	4	4	5	4	3	3	5	3	5	4	5	4	5	5	5	4	4	2	3	3	3	4	3	3	3	3	2	2	3	2	3	2	2	3	3
1	20	6	4	6	7	6	5	5	6	6	7	6	4	7	7	4	6	1	1	2	3	1	2	2	1	2	2	2	3	3	2	2	2	2	2	3	2	4	3	4	4	3	4	4	4	4	3	4	4
1	19	6	7	7	5	7	7	5	5	5	6	5	5	5	6	5	4	2	1	2	2	1	1	3	1	2	3	3	3	1	1	2	3	3	3	3	3	4	4	4	4	3	4	4	4	4	4	3	4
1	21	6	5	4	7	5	6	7	4	6	4	6	7	5	7	6	6	1	1	3	2	2	1	2	2	1	1	1	2	2	3	2	1	2	3	2	2	4	3	4	3	3	3	4	4	4	3	4	3
1	20	6	6	6	3	3	3	3	2	1	2	4	2	4	4	5	3	3	4	2	4	3	1	3	2	2	3	2	2	2	3	5	5	4	5	4	4	1	2	1	1	1	3	3	2	3	2	3	2
1	20	6	4	4	6	6	5	6	5	6	5	3	3	3	5	4	2	3	2	3	3	4	5	5	4	3	3	4	3	3	5	1	3	2	2	4	4	1	2	2	2	2	1	2	1	2	2	2	2
1	20	3	5	4	2	4	5	5	3	6	4	5	6	5	5	5	5	2	2	2	4	2	5	5	4	4	3	2	3	3	2	4	3	3	4	4	4	3	3	2	2	3	1	2	1	1	2	1	4
1	21	2	2	3	4	1	1	1	2	6	5	6	4	1	3	3	3	4	4	4	3	3	4	4	3	3	3	1	3	2	2	3	3	3	3	2	2	4	2	4	4	4	4	3	4	4	4	2	2
2	20	1	1	3	2	6	6	6	4	6	5	4	5	4	5	4	2	1	1	3	1	3	2	2	3	4	4	5	4	4	5	2	4	3	3	5	5	3	3	3	2	2	4	4	2	3	4	3	1
2	21	3	4	4	3	1	1	2	2	5	3	3	4	3	4	3	3	2	3	4	2	3	1	1	2	1	1	1	1	2	1	2	4	4	2	2	3	3	3	2	2	2	2	3	1	2	2	2	3
2	19	4	4	5	5	4	5	3	5	6	5	6	3	1	1	3	1	3	4	3	4	4	1	2	1	3	3	1	1	2	3	5	3	5	4	5	5	4	3	4	3	3	4	4	3	4	4	4	4
2	20	5	4	4	6	2	4	4	4	4	3	4	5	7	5	6	6	3	4	3	4	3	5	3	4	4	5	5	5	4	5	3	3	4	4	5	4	1	1	1	1	2	3	2	2	3	2	2	4
1	20	5	3	6	3	7	5	7	4	1	1	3	3	4	2	5	2	3	3	4	3	4	2	3	2	3	3	4	4	3	4	3	4	4	3	4	5	1	2	1	1	2	1	2	1	1	2	1	1
1	20	3	4	2	3	1	3	2	1	6	6	5	6	3	2	3	5	4	3	5	3	3	3	4	4	4	4	1	3	1	2	3	4	4	3	1	2	4	3	2	2	2	2	2	2	2	3	3	1
2	19	7	6	6	5	5	6	7	5	7	6	7	7	5	6	5	5	4	3	3	5	4	4	4	4	4	5	2	3	4	3	1	1	3	2	2	4	4	3	3	2	2	1	2	1	1	1	2	1
2	20	4	4	3	2	7	5	5	6	6	4	6	6	4	5	4	3	3	3	4	3	4	1	3	3	1	2	4	3	4	4	4	5	3	3	1	2	1	1	2	2	1	3	2	2	3	2	3	2
1	19	4	4	2	2	5	3	6	4	1	4	1	2	6	5	5	4	4	5	5	5	5	3	3	3	4	3	2	2	3	3	5	5	5	3	4	3	2	1	3	1	3	2	2	3	2	1	2	4
1	19	4	3	3	5	4	5	4	3	4	5	4	2	5	6	4	6	3	3	3	3	4	1	3	2	3	1	5	4	4	5	5	5	5	4	4	3	3	2	2	3	3	4	4	3	3	3	3	3
1	19	5	6	5	5	4	5	6	4	7	5	5	4	5	6	6	5	1	1	3	1	3	3	3	3	2	4	2	4	2	4	1	2	2	2	4	4	1	2	2	2	2	1	2	2	1	1	2	2
1	20	7	5	4	5	7	5	5	5	3	2	2	2	3	3	4	3	2	2	4	3	3	1	2	3	2	3	5	5	5	4	5	4	3	4	4	4	1	2	1	2	2	1	2	2	2	2	2	4
2	19	4	4	4	7	7	5	6	6	6	5	4	5	5	7	5	6	2	2	1	1	2	1	3	2	1	3	3	1	3	1	2	2	3	2	3	3	3	4	4	3	4	4	4	4	4	3	4	4
2	20	6	5	6	6	5	5	4	3	4	5	3	3	5	4	5	3	1	2	3	2	2	2	3	4	4	2	2	2	3	2	5	5	5	4	4	4	3	2	2	2	3	1	1	2	1	2	2	4
1	20	5	6	3	3	5	6	4	4	3	4	4	4	1	3	1	3	1	3	3	3	3	5	5	5	4	3	5	4	3	4	1	2	3	3	1	2	2	2	1	2	2	4	3	3	3	4	3	4
2	19	4	5	3	4	2	1	4	2	6	3	6	6	3	2	2	3	1	2	2	2	1	1	1	3	3	3	2	3	1	2	1	1	1	2	2	2	3	2	3	2	2	4	3	3	3	4	3	4
2	20	4	4	2	5	5	3	3	3	7	6	6	6	3	4	4	4	5	4	5	5	5	3	2	3	3	4	4	5	4	5	3	4	2	4	4	4	3	2	3	3	2	4	2	3	3	4	2	4
2	21	6	5	5	5	1	1	1	1	1	4	2	1	5	3	5	3	2	2	2	3	3	1	1	1	2	3	2	3	4	4	5	4	5	3	5	5	2	3	2	2	3	2	2	3	2	2	2	2
2	20	5	4	4	5	7	6	5	6	4	4	2	5	7	6	7	7	5	5	4	5	5	3	3	4	3	3	4	4	5	4	3	4	4	3	4	5	3	2	3	2	3	2	1	2	3	3	3	2
2	20	6	5	5	5	3	4	5	3	3	2	3	5	4	3	3	2	3	3	2	4	4	1	2	2	3	3	3	3	3	3	1	2	2	2	4	3	3	2	2	3	3	2	3	2	2	2	1	2
2	20	7	4	6	4	5	4	3	3	7	6	7	4	2	2	3	2	3	4	2	4	2	3	3	4	2	4	2	2	4	2	3	3	3	3	2	2	3	2	3	2	3	3	3	2	3	3	3	3
2	19	3	5	2	3	1	4	1	3	3	5	2	4	3	4	4	4	3	2	4	4	3	2	2	3	4	2	3	2	4	3	5	5	3	3	4	5	3	2	2	2	2	2	3	2	2	2	3	2
2	20	4	5	5	5	7	6	7	4	6	6	5	3	6	4	6	4	5	4	5	4	5	2	4	2	4	3	1	3	3	2	5	4	3	4	3	4	4	2	2	3	3	1	2	2	2	2	2	4
2	20	2	3	1	3	2	3	1	2	7	4	5	5	3	2	5	5	2	4	2	3	3	1	3	3	2	2	4	3	3	4	1	2	3	1	2	2	1	1	1	1	2	1	2	1	2	1	1	2
2	20	3	2	3	2	2	4	2	1	2	2	2	2	4	4	4	3	5	3	5	4	5	2	3	3	3	2	2	3	4	3	3	3	3	3	4	3	1	1	2	1	2	4	3	3	2	3	4	4
2	20	3	3	3	5	5	5	4	4	3	3	3	2	5	3	4	3	1	3	1	3	3	5	3	4	4	4	4	3	5	5	4	3	5	3	4	3	3	3	2	2	3	1	2	1	2	2	1	3
1	20	3	3	3	4	1	1	3	1	4	4	5	3	3	3	3	3	2	2	3	3	3	5	4	5	5	4	3	3	3	2	4	4	3	4	2	2	3	2	3	2	2	1	2	2	2	1	1	3
2	20	6	4	4	7	6	5	5	5	5	5	5	7	5	5	5	7	2	2	3	1	3	1	3	1	3	3	3	2	1	3	1	1	3	1	2	1	3	4	3	4	3	3	3	3	4	3	4	3
2	21	1	1	1	2	2	3	2	2	2	4	4	3	3	4	2	4	3	4	3	4	3	5	3	3	5	5	5	5	4	5	2	3	4	4	2	2	2	3	1	1	3	2	3	2	3	1	2	3
2	19	2	2	3	2	5	5	5	5	2	3	1	4	3	4	5	4	2	3	2	4	4	2	3	4	2	2	4	3	4	5	5	5	3	5	1	2	1	1	1	2	2	2	1	3	2	1	2	3
1	21	4	4	7	4	7	5	4	5	7	4	7	6	6	4	7	6	2	3	3	2	2	2	1	2	2	3	3	1	1	3	2	2	1	1	2	3	3	3	3	3	3	3	3	4	3	4	3	4
2	21	3	3	5	3	4	3	5	5	7	7	6	5	6	6	5	3	2	3	1	3	2	2	1	2	3	3	1	1	1	1	1	3	1	2	3	1	2	3	2	1	1	1	1	1	2	1	2	1
2	20	2	2	3	4	6	4	5	5	6	3	4	4	2	2	1	1	4	5	5	3	3	5	3	3	5	3	3	3	3	4	3	3	2	3	3	4	2	3	1	1	1	4	2	3	3	3	4	2
1	23	7	4	7	5	6	6	7	7	6	4	4	7	5	5	6	5	3	1	3	3	1	3	2	1	1	1	2	1	2	1	2	2	1	1	2	3	3	4	4	4	4	3	4	4	4	3	4	4
2	20	3	5	4	4	1	4	1	1	7	4	5	4	2	4	3	4	4	3	4	4	3	2	2	2	2	4	5	4	4	3	2	4	4	3	3	2	3	2	3	3	2	3	3	2	3	3	2	4
1	21	4	5	5	5	3	3	2	2	4	4	3	3	4	3	2	5	2	4	3	3	3	5	4	3	4	4	4	3	3	3	5	4	4	4	3	3	3	3	3	2	2	1	2	2	1	2	1	1
1	22	2	4	4	3	1	2	3	2	4	2	5	4	3	5	5	3	4	4	3	5	3	1	3	3	2	1	5	5	5	4	2	3	2	3	1	3	3	3	2	2	2	3	3	2	3	3	2	3
1	21	7	5	7	6	3	2	3	4	2	4	4	3	7	7	5	4	1	2	2	3	3	3	1	3	2	3	1	1	3	2	2	3	2	2	2	2	3	2	3	3	2	4	3	4	3	3	2	3
1	19	6	5	5	7	6	6	6	4	7	4	5	4	6	4	5	7	2	2	1	2	3	1	1	2	2	1	3	3	2	2	1	1	1	3	1	3	3	3	3	3	4	3	4	3	4	4	4	4
1	20	4	4	3	5	2	3	2	4	1	3	2	3	7	6	6	4	3	4	4	4	4	1	1	1	3	3	1	3	2	3	3	4	4	3	4	3	1	1	2	2	1	3	3	2	2	3	2	3
2	20	2	4	2	2	7	6	5	6	1	4	2	2	7	6	6	5	3	2	2	3	4	1	3	3	3	3	2	2	3	3	2	3	4	3	2	3	1	1	1	1	1	3	2	3	2	2	2	4
2	20	4	4	2	2	5	3	3	5	6	6	4	4	3	4	2	5	3	3	3	4	3	4	3	3	4	5	2	2	3	2	3	3	2	4	2	3	2	2	1	1	2	2	2	2	1	2	2	1
2	21	5	4	6	5	1	1	2	1	3	4	4	4	4	2	5	2	1	2	2	2	2	4	3	3	5	3	3	3	4	2	4	3	3	3	3	4	2	3	2	1	3	4	2	3	3	4	4	4
2	20	2	3	4	1	2	1	2	3	4	2	5	5	5	4	3	6	5	3	4	5	5	4	4	4	5	5	1	3	2	1	4	3	3	3	3	3	2	2	2	2	2	1	2	2	2	2	2	1
2	20	5	4	5	3	3	4	3	3	6	3	4	6	1	3	2	1	3	4	4	3	3	4	5	4	5	4	1	3	1	3	5	3	5	5	3	2	1	1	1	2	1	2	1	1	2	3	1	2
2	20	4	4	4	4	3	5	3	2	7	5	7	6	6	6	3	5	4	4	3	3	4	3	3	4	2	4	2	4	3	4	5	5	4	4	5	4	1	2	2	1	2	3	2	3	3	3	2	1
2	20	6	5	5	4	3	2	3	5	3	2	2	2	1	3	2	3	1	3	3	3	3	1	2	3	2	3	1	2	3	3	1	2	2	2	1	1	3	2	3	2	2	4	3	2	2	4	2	3
2	19	6	5	6	5	7	5	6	6	5	6	5	4	7	4	5	4	1	1	3	1	1	2	2	2	2	2	3	3	3	2	5	3	3	5	1	2	2	2	2	3	2	3	2	3	3	3	2	3
2	20	1	2	2	3	7	4	7	5	3	4	2	4	6	4	6	5	3	4	3	4	3	1	3	2	2	3	5	5	3	3	5	5	5	5	5	3	2	2	3	3	1	2	3	2	3	2	2	2
2	20	7	4	6	4	6	5	6	6	7	6	4	6	7	5	6	5	2	3	3	2	2	1	3	3	2	2	4	4	4	4	4	4	5	4	2	3	3	2	3	2	3	2	2	1	2	3	3	4
2	20	5	4	5	5	4	3	2	3	5	6	4	4	5	5	5	6	1	1	2	3	2	3	4	3	3	3	5	4	3	4	4	5	5	5	3	4	3	3	3	3	3	2	1	1	3	1	1	2
2	20	6	5	4	5	1	2	1	3	5	5	3	4	6	5	4	4	3	3	4	4	4	5	4	5	3	5	2	4	2	2	5	4	3	4	5	5	3	2	2	2	2	3	2	2	2	2	3	2
2	21	3	4	5	4	1	1	4	1	5	5	3	5	4	4	5	5	5	5	4	4	4	4	3	4	3	3	4	4	4	4	2	2	2	4	5	4	3	3	3	3	2	4	4	2	3	2	3	1
2	20	4	5	5	3	7	4	4	6	3	3	2	5	5	4	5	5	2	2	2	3	3	5	3	3	3	4	5	4	4	3	4	4	4	3	3	3	4	3	3	2	2	2	1	2	2	2	1	2
2	20	3	3	3	3	6	5	6	4	7	5	4	5	1	4	2	1	5	3	5	4	3	3	4	3	2	3	3	4	2	4	3	3	3	4	5	5	3	3	2	3	3	2	1	3	2	2	2	1
2	21	5	5	3	4	2	4	2	3	4	2	4	3	2	2	4	3	2	2	3	3	3	1	2	1	3	1	3	3	3	4	5	3	3	3	5	4	1	2	1	1	2	2	2	1	3	3	2	3
1	19	3	4	3	4	5	6	4	4	7	5	6	4	1	3	1	3	4	4	3	4	3	4	4	4	4	4	2	2	2	2	1	2	2	1	2	2	2	1	2	2	3	3	3	3	2	2	2	4
2	19	5	4	5	3	5	4	4	3	3	2	4	4	7	6	4	6	2	2	2	2	3	4	4	3	3	4	1	3	2	2	2	4	4	4	1	2	2	2	3	2	2	4	4	2	4	4	3	4
2	21	5	5	5	5	7	5	4	6	7	7	5	5	6	4	6	4	4	4	3	4	3	1	2	2	2	3	4	4	3	4	2	3	3	4	1	2	1	1	2	1	1	4	3	4	2	4	2	2
2	20	1	2	1	2	3	5	5	4	1	4	1	3	2	2	4	3	2	2	2	3	3	1	3	3	1	1	2	4	4	3	3	3	2	3	2	3	3	3	3	3	2	2	2	1	1	1	1	2
2	20	4	5	6	4	5	5	7	6	7	6	7	4	6	6	7	5	5	3	5	5	5	5	5	4	4	4	1	3	3	3	3	3	3	4	1	3	2	3	2	1	2	3	2	3	3	2	3	3
1	21	1	2	2	1	5	4	3	5	5	4	4	5	4	3	4	3	3	3	3	3	3	1	2	2	2	1	2	2	2	3	3	2	1	1	1	1	2	2	3	3	3	1	1	1	2	2	2	3
2	21	7	7	4	5	3	2	3	3	4	4	4	2	7	5	5	6	1	2	2	3	2	2	1	2	1	2	3	2	3	1	2	3	1	3	3	1	4	3	3	3	4	3	4	3	3	4	3	4
2	20	6	6	5	6	6	4	4	7	5	7	5	6	6	5	7	6	2	3	3	2	4	3	3	3	4	2	4	4	4	3	5	5	5	4	5	3	1	1	2	1	2	1	2	1	2	2	1	2
2	20	1	1	1	3	6	3	4	6	5	4	3	6	3	3	3	2	4	3	4	4	3	5	4	5	3	4	2	4	3	2	5	3	4	4	2	3	4	3	4	4	3	4	3	3	3	4	3	3
2	21	4	3	4	2	5	4	4	4	1	3	3	1	2	4	4	2	2	3	1	3	1	3	1	3	3	3	1	1	1	2	3	1	3	3	1	1	4	3	3	3	3	3	3	3	3	3	3	4
2	21	5	5	4	3	1	2	4	1	7	5	5	4	2	2	1	2	3	3	4	3	2	5	4	4	5	4	5	5	4	5	2	4	2	2	2	2	3	3	3	2	3	1	1	2	2	2	2	3
2	20	2	4	2	4	2	3	4	4	2	3	1	4	2	4	3	2	1	2	3	3	2	5	5	5	4	5	4	4	3	4	2	3	2	4	4	4	3	3	3	2	2	4	3	2	2	2	3	3
2	20	6	4	3	3	2	4	4	2	4	4	3	5	7	6	7	6	2	2	3	3	3	4	4	5	3	3	4	5	4	4	1	1	3	2	1	2	4	3	2	3	3	3	3	2	2	3	3	3
1	21	3	4	2	2	4	4	4	4	3	5	2	3	3	5	5	3	3	4	4	4	4	4	4	5	4	4	4	3	5	3	3	4	3	3	3	3	3	3	2	2	2	3	2	3	2	3	3	3
2	20	7	4	4	6	3	3	3	5	6	4	4	5	2	4	4	2	3	2	1	1	1	1	3	2	1	3	1	3	3	3	2	2	3	3	2	2	3	3	2	2	2	2	3	2	2	1	3	1
1	20	1	4	1	3	2	4	4	1	4	4	2	3	4	3	5	3	2	4	3	2	2	2	2	2	2	3	3	3	3	2	1	2	2	3	2	2	2	3	1	2	2	2	3	3	3	3	2	3
2	19	4	4	4	2	4	4	3	3	6	5	3	6	7	7	6	6	3	3	4	3	4	3	4	4	4	4	3	3	3	3	4	3	4	3	1	2	4	4	2	2	3	2	1	2	1	1	3	2
2	21	5	6	5	6	5	4	7	7	5	5	7	6	7	4	6	4	2	1	2	1	3	2	2	2	2	2	2	1	2	2	1	3	1	3	2	1	4	3	3	4	4	3	3	3	3	4	4	4
1	20	7	7	4	5	4	5	7	5	7	7	7	5	4	5	5	4	2	1	3	2	1	2	3	2	2	1	1	2	3	2	1	2	3	3	1	3	3	3	4	3	4	4	4	3	4	4	4	4
2	19	1	1	3	2	3	2	3	5	5	3	3	5	1	3	3	2	1	1	2	1	2	2	2	2	2	4	2	2	4	2	4	3	4	5	2	2	3	2	3	2	3	3	2	2	2	3	2	2
2	19	5	6	5	5	4	7	4	7	7	4	7	5	6	7	7	7	1	3	1	3	2	2	1	2	2	2	2	3	2	3	2	2	1	1	2	1	3	4	3	4	4	3	4	4	4	4	3	4
2	20	7	4	5	5	7	4	4	5	6	3	4	6	5	3	5	3	4	3	5	4	3	5	3	5	3	4	5	4	5	5	4	5	3	3	5	4	3	2	3	2	3	4	2	2	3	3	3	1
2	22	3	5	2	3	6	4	5	5	5	6	6	5	2	2	2	3	3	2	3	4	2	1	3	2	1	3	1	3	3	2	2	3	3	2	2	4	4	3	2	4	3	4	4	2	3	4	2	2
2	20	4	4	4	3	2	1	1	4	5	3	4	6	7	4	7	4	3	2	4	4	3	2	3	4	3	4	1	3	3	1	2	2	3	2	4	3	2	2	1	1	2	2	2	1	1	3	3	3
1	20	2	3	3	1	4	4	2	4	2	1	3	3	4	4	5	4	2	3	2	3	4	2	2	3	3	3	4	3	3	3	1	3	2	1	1	3	3	3	2	2	3	3	2	3	3	3	3	1
1	20	2	2	4	3	3	2	3	4	3	3	2	4	5	3	5	4	1	2	1	3	3	3	4	4	3	3	4	4	3	4	5	4	4	5	4	3	1	1	2	2	2	1	1	2	2	2	2	3
1	22	7	6	5	6	6	4	4	4	4	5	3	3	7	4	5	4	2	3	2	2	3	3	4	4	3	2	2	3	3	2	4	4	4	3	1	3	1	1	1	1	1	3	2	2	3	2	3	1
1	20	7	5	6	7	2	3	4	3	2	2	2	2	6	4	3	4	2	3	4	3	4	1	2	2	3	2	4	3	4	3	4	3	4	3	3	3	3	2	2	2	2	3	2	3	3	3	3	3
1	24	5	3	5	4	3	3	3	2	1	3	2	2	2	4	2	4	1	2	2	1	3	1	2	3	3	3	1	2	1	3	1	3	1	1	1	1	3	3	3	3	2	4	4	3	3	3	3	2
2	20	3	5	2	3	7	5	5	6	3	3	4	4	3	2	2	3	4	4	4	3	4	1	2	2	2	3	1	2	3	3	1	3	3	3	3	3	4	3	4	4	2	1	2	2	2	2	2	2
1	21	5	7	6	6	6	7	7	7	7	5	6	4	5	4	4	5	1	2	2	2	1	2	2	2	3	2	2	1	2	2	2	3	2	1	2	3	4	4	4	4	3	3	3	4	4	3	4	3
1	21	6	4	4	4	7	6	4	6	5	6	5	6	7	7	7	5	4	4	5	4	3	2	2	3	4	4	1	2	1	3	5	4	5	4	4	4	1	1	1	2	1	2	1	2	3	1	2	1
2	20	6	6	4	4	4	3	5	4	5	6	3	5	6	4	6	5	3	2	4	4	2	2	2	2	4	2	5	5	3	5	1	2	3	2	3	3	2	3	3	2	2	1	1	2	2	1	1	4
2	20	4	4	3	2	7	4	6	7	5	5	6	4	7	5	7	4	4	5	3	5	4	3	3	4	2	3	4	3	5	4	2	2	2	3	1	1	3	3	2	3	3	4	4	3	4	2	3	1
1	20	7	6	5	5	1	2	2	4	5	4	3	3	6	6	5	4	2	4	3	3	4	1	3	2	1	3	2	3	2	3	2	2	3	3	1	2	1	1	1	2	1	2	3	1	2	1	2	1
2	20	6	6	5	3	6	4	4	5	5	3	6	4	2	4	4	3	3	4	3	3	4	1	2	3	3	3	5	5	5	3	1	1	2	3	2	3	4	3	2	4	4	2	2	3	3	2	1	3
2	20	5	4	3	4	2	3	3	1	5	5	6	5	2	3	1	2	1	3	1	2	3	3	2	2	1	1	1	2	3	3	2	3	1	3	1	2	1	2	1	2	2	2	3	3	2	1	2	1
1	20	2	2	2	2	3	2	2	4	3	2	3	3	5	5	4	6	3	2	4	3	4	2	2	2	2	4	5	5	5	5	1	3	2	2	5	5	2	3	2	3	2	3	2	3	3	3	2	1
1	19	4	5	2	4	3	3	5	4	5	3	6	5	1	4	2	4	1	1	3	3	3	3	3	1	1	2	1	3	3	1	3	1	1	3	1	3	3	3	3	3	3	3	3	2	3	2	3	2
1	20	1	2	2	3	7	6	5	4	5	4	4	6	5	3	3	5	5	3	4	5	5	3	4	4	2	2	3	4	3	2	3	4	3	2	1	1	3	4	3	3	3	4	3	3	3	4	4	3
1	19	5	4	6	5	7	6	5	4	5	6	7	7	7	6	6	6	1	1	2	1	3	1	1	2	1	3	2	3	1	3	2	3	1	2	2	2	3	3	3	4	4	4	3	3	4	3	3	3
1	21	7	5	4	7	7	4	7	6	5	5	5	7	5	4	6	5	4	3	4	4	3	1	3	2	3	2	3	4	4	4	4	3	4	5	4	3	2	2	1	2	3	2	2	1	1	3	2	4
1	20	6	7	7	6	5	6	6	5	5	6	5	7	5	4	5	6	2	2	2	1	2	1	3	2	3	2	1	2	2	3	3	1	3	3	3	1	4	4	4	3	4	4	3	3	3	4	3	4
2	19	4	4	4	4	3	3	4	5	7	6	5	4	4	4	4	4	2	2	2	2	4	4	4	3	3	4	5	3	3	5	2	2	4	4	2	3	1	2	1	2	1	4	4	4	2	3	2	2
2	21	3	3	5	2	4	5	3	5	6	4	5	5	7	7	7	6	1	2	3	3	2	1	3	3	2	3	1	3	3	3	2	2	2	3	5	4	2	2	1	2	2	3	3	3	2	2	3	3
2	20	7	5	7	6	6	6	3	6	1	2	4	2	2	2	2	2	1	1	3	3	3	5	5	4	3	4	1	3	2	1	5	5	3	3	4	4	4	4	3	4	3	4	4	4	3	3	4	4
2	21	2	2	4	3	5	4	3	4	6	4	4	6	5	5	4	6	4	5	3	4	4	2	3	4	2	3	3	3	3	3	1	3	1	3	4	4	4	4	4	3	4	4	3	4	4	4	3	3
2	20	6	4	7	6	5	5	5	6	5	4	7	7	7	5	6	4	1	2	2	3	1	2	1	3	3	1	3	2	1	1	2	2	1	2	1	2	3	4	4	4	3	4	3	3	3	3	4	3
2	19	2	3	3	1	5	4	3	3	3	3	2	3	2	2	4	1	3	3	3	4	4	4	5	3	4	5	4	4	4	5	1	3	3	3	5	5	2	3	3	1	2	4	4	4	3	3	2	4
2	20	6	5	5	6	5	5	4	6	4	4	4	3	6	4	4	3	4	3	4	3	4	4	3	3	3	5	3	4	3	2	2	4	2	3	2	2	1	2	2	2	1	4	3	3	3	3	3	2
2	20	3	4	5	3	6	5	5	6	2	4	2	3	6	5	5	5	2	4	2	4	2	2	2	3	4	3	3	4	4	3	1	3	1	2	3	4	1	1	2	2	2	4	2	2	3	4	2	3
1	20	3	3	3	3	6	5	6	5	4	2	3	2	7	6	5	4	5	5	4	4	4	2	3	4	3	3	3	3	2	2	5	4	4	4	3	3	1	2	1	2	2	3	2	3	2	3	2	2
1	20	6	3	4	5	3	3	2	4	7	6	6	4	2	3	3	4	3	3	3	4	3	3	3	2	2	3	1	2	1	2	3	2	4	3	1	3	1	2	1	2	1	3	3	2	2	2	3	3
2	20	6	5	4	6	5	4	3	5	5	5	5	5	2	2	3	2	3	4	4	3	4	1	3	3	3	3	1	2	2	2	3	2	4	3	5	5	3	2	2	2	2	1	1	1	2	2	1	2
1	20	5	4	5	5	3	3	3	3	3	2	3	3	4	5	4	5	3	4	4	4	4	2	3	4	3	4	5	4	3	3	2	2	2	3	4	5	1	2	2	1	1	3	2	3	2	2	3	2
2	20	5	7	5	5	7	5	6	7	7	6	4	4	4	7	4	7	3	2	4	4	4	3	2	4	4	4	1	2	3	2	3	2	4	3	3	4	2	2	3	1	2	2	3	3	2	2	2	1
2	19.5	7	5	5	4	4	6	5	4	6	7	6	7	5	7	4	6	3	2	1	3	1	2	1	1	1	2	2	2	1	1	3	2	1	1	1	1	3	4	3	4	3	3	4	4	3	4	3	3
2	19	7	7	7	5	6	6	4	5	6	4	6	5	5	5	6	5	1	3	1	1	3	2	3	1	2	1	2	1	2	1	2	3	2	1	2	2	4	3	4	3	3	3	4	3	3	3	3	4
2	19	6	6	4	7	7	4	4	7	4	4	5	4	4	5	4	6	1	3	3	3	3	2	3	2	2	2	1	1	3	3	1	1	1	2	2	2	4	3	3	3	3	4	3	3	3	4	3	4
2	20	5	7	7	6	4	5	4	4	7	6	6	7	7	6	4	7	1	3	3	1	3	1	1	1	1	3	1	2	2	2	2	2	2	2	1	1	3	2	3	2	2	1	1	1	2	1	2	3
2	20	4	3	5	5	7	5	4	7	5	3	5	4	2	2	4	3	2	3	3	3	3	4	4	3	4	4	3	3	4	2	1	2	3	2	2	3	3	3	3	3	3	3	2	3	2	2	3	1
2	20	5	3	3	5	1	3	3	2	6	6	4	5	4	3	5	4	2	3	3	2	3	4	3	4	3	3	2	3	4	3	3	4	4	4	1	1	4	3	3	2	3	2	2	2	2	1	2	3
2	21	7	4	4	4	5	5	4	6	5	7	6	5	5	5	5	7	1	2	2	3	3	3	2	1	1	2	2	3	2	1	1	2	3	3	2	1	4	4	4	3	3	3	4	3	4	4	4	3
2	21	7	4	7	6	1	1	1	3	2	4	1	3	6	5	5	4	1	2	1	2	3	4	5	3	4	5	4	5	4	3	2	2	2	4	4	3	2	1	2	2	2	3	3	3	3	2	3	2
2	20	6	6	3	5	2	4	2	4	6	4	6	5	7	5	4	6	5	4	4	3	4	2	3	3	4	3	3	4	3	3	1	3	3	3	3	4	3	2	2	2	2	3	3	2	3	2	2	4
2	20	6	7	6	4	6	4	4	4	5	6	6	4	4	6	5	6	2	1	2	1	2	1	2	2	1	1	1	1	2	1	2	1	1	1	1	3	3	3	4	3	4	3	3	4	3	3	3	4
1	20	6	6	3	5	6	5	4	5	4	3	4	3	2	3	2	3	3	3	4	4	4	3	3	4	3	4	3	4	4	3	3	2	3	3	2	3	4	3	4	3	3	3	2	3	2	2	2	4
2	20	6	6	6	5	6	4	5	5	2	3	4	4	2	2	3	3	1	1	1	1	3	3	2	1	1	3	1	1	2	2	2	3	3	2	1	2	3	2	3	3	3	2	3	1	2	3	2	4
2	19	7	5	4	7	4	6	4	6	5	7	5	6	7	6	7	6	1	1	1	3	3	1	2	2	2	2	2	2	2	2	2	1	3	2	1	1	2	1	2	3	3	3	3	2	2	2	2	4
1	20	5	4	4	6	5	5	4	4	5	6	7	4	6	7	4	7	3	3	3	1	3	1	3	1	3	1	2	1	1	1	1	3	3	3	2	2	4	4	3	3	4	4	4	3	3	4	4	4
1	20	2	2	2	2	4	2	5	4	4	3	4	4	6	4	6	4	1	2	1	3	2	5	5	4	3	4	5	5	4	4	3	4	3	2	1	2	3	3	2	3	2	3	2	3	3	2	3	4
1	20	7	5	5	4	4	4	4	3	6	6	4	6	5	6	5	4	4	4	3	5	4	3	3	4	3	3	4	5	4	3	3	4	4	3	3	3	3	2	2	3	2	1	1	1	1	2	1	2
1	19	6	5	5	3	4	5	4	5	4	3	3	4	6	3	5	6	1	2	2	3	1	3	3	2	4	4	3	3	3	2	2	3	4	2	5	4	2	2	1	3	2	4	3	3	3	3	2	3
2	20	5	6	4	4	5	3	3	6	2	1	3	2	6	6	4	4	1	1	2	3	3	2	1	3	1	3	3	3	3	3	1	1	1	3	1	1	4	2	3	4	2	2	1	3	2	3	2	4
2	20	7	5	6	5	6	5	4	3	4	3	2	3	1	2	2	1	3	2	3	3	4	4	5	5	4	4	4	4	5	3	1	3	3	3	5	4	3	3	3	3	3	4	4	4	4	4	4	3
2	20	6	4	5	4	6	5	4	6	7	7	7	5	5	4	7	6	5	4	5	3	5	4	3	5	4	3	1	2	2	3	4	3	4	3	4	3	3	3	3	3	3	4	4	3	3	4	3	4
2	20.25	6	6	6	5	3	5	5	2	4	2	4	2	4	3	3	5	4	3	5	3	4	4	4	3	4	3	1	3	3	2	5	3	5	4	3	3	3	3	2	2	3	1	2	2	2	2	1	4
2	20	4	6	4	6	7	6	6	5	7	5	5	6	6	5	5	6	2	2	2	3	2	2	2	1	2	3	2	1	2	2	2	2	1	3	2	2	3	4	3	4	4	4	4	3	3	3	4	3
2	21	4	5	4	3	5	3	6	4	7	5	6	7	4	4	5	4	1	3	3	2	1	2	2	1	3	2	1	2	3	2	1	2	1	2	3	2	4	3	4	4	2	2	3	1	2	2	3	1
2	19	2	4	4	4	5	5	4	3	2	2	2	3	3	5	5	5	2	3	2	2	2	4	4	4	3	4	2	4	2	3	5	5	5	3	1	2	3	2	2	2	2	4	2	3	4	2	3	1
2	20	4	3	4	3	4	3	4	5	4	3	3	3	4	3	3	4	4	4	4	3	3	5	4	4	4	5	5	4	4	4	4	4	4	4	5	4	3	3	2	2	2	1	2	2	2	1	2	1
2	20	7	4	4	6	7	5	6	4	3	3	3	4	3	4	2	3	2	4	3	3	3	2	4	2	3	4	1	3	1	2	2	4	3	2	4	4	4	4	3	4	4	3	3	4	3	4	3	3
2	20	1	3	2	3	6	4	5	6	4	4	3	5	6	5	6	5	4	4	3	5	4	4	5	5	4	3	1	3	3	3	1	2	2	3	3	4	2	2	2	2	2	3	3	2	2	2	3	3
2	20	6	3	4	3	6	3	6	5	4	5	4	3	4	2	4	4	2	2	3	2	1	1	2	1	3	1	1	3	3	2	2	1	2	1	2	2	1	1	2	2	2	2	2	2	2	1	1	3
1	20	5	6	3	5	5	5	3	6	2	4	2	3	2	3	3	4	3	4	2	3	2	4	4	3	4	5	3	4	4	2	4	3	5	3	3	3	4	2	2	4	3	2	2	1	1	3	3	3
1	20	1	1	2	3	6	5	6	4	1	4	3	4	4	4	4	4	3	4	2	2	4	2	2	3	2	2	5	4	5	4	2	4	3	2	4	3	3	3	3	3	2	2	2	1	2	2	2	4
2	20	3	4	5	3	2	3	1	4	1	1	3	2	5	5	5	3	2	1	2	1	1	3	3	2	3	2	1	2	3	2	2	2	2	3	1	3	4	2	2	3	3	4	3	2	3	2	2	4
2	20	6	3	6	6	5	4	5	5	2	3	2	2	3	4	4	2	5	5	3	5	5	5	4	3	5	4	5	4	3	4	4	5	3	3	4	3	2	2	2	2	2	2	1	3	1	2	2	2
2	19	4	5	3	3	6	4	3	4	2	1	3	4	4	4	3	5	2	4	2	4	2	3	4	3	4	3	3	4	4	2	4	3	5	3	3	3	3	3	3	2	2	4	3	3	4	3	3	1
2	19	1	2	4	3	5	5	3	4	2	2	3	3	7	4	6	6	5	5	5	4	3	5	5	5	4	4	2	2	3	2	3	3	2	4	2	2	2	3	2	1	1	3	2	2	2	2	3	1
2	19	6	5	6	5	6	6	6	4	5	4	4	4	6	6	6	6	3	1	3	1	3	2	3	3	2	3	2	3	2	2	3	3	3	1	2	1	2	3	2	2	3	1	2	1	1	1	1	1
2	20	7	6	4	6	4	4	5	2	1	1	1	1	3	3	4	3	2	2	3	3	3	3	3	3	2	3	5	4	3	4	1	2	2	3	2	4	1	2	2	1	1	1	1	1	2	2	1	4
2	20	2	2	3	1	4	4	4	5	6	4	4	4	5	5	4	3	3	3	3	3	3	2	4	2	4	3	5	4	5	3	4	4	5	3	2	2	1	2	2	2	1	1	2	2	1	1	2	3
2	20	5	5	5	6	6	7	4	7	5	4	5	5	4	4	5	4	1	3	2	3	3	4	5	3	3	5	4	4	3	3	2	3	3	3	1	3	2	2	2	2	2	4	2	3	3	3	3	4
2	20	3	2	2	4	6	6	3	4	5	5	3	3	3	4	4	2	5	4	3	5	4	4	5	3	3	3	3	2	4	3	2	3	3	4	5	4	4	4	3	3	3	2	2	2	2	3	2	2
2	20	5	5	3	3	4	3	5	4	7	4	4	5	5	4	3	3	2	2	3	3	2	5	5	5	5	3	4	3	4	4	3	2	3	4	2	2	2	3	2	1	1	3	3	2	3	2	3	1
2	21	6	5	4	3	5	5	4	5	1	2	3	1	5	5	3	5	5	5	5	3	5	3	3	4	3	2	5	3	4	5	2	2	4	2	3	4	3	2	2	3	2	4	4	4	2	2	2	3
2	19	5	4	4	3	4	5	3	4	5	3	5	5	3	4	2	2	2	2	3	4	3	4	5	3	5	3	1	3	3	3	4	3	5	4	4	3	3	2	2	2	3	2	3	2	3	2	2	1
1	20	3	4	2	4	2	4	3	2	4	3	4	4	6	6	3	4	5	4	5	4	4	2	3	3	3	4	3	3	3	2	2	3	2	3	3	3	1	1	1	1	2	2	1	2	2	2	2	2
1	19	6	5	4	5	2	3	3	4	3	2	4	4	1	1	1	4	2	2	4	3	3	2	2	3	3	4	5	5	5	4	5	5	5	5	5	4	3	2	3	2	2	4	3	2	3	3	2	2
1	20	4	5	5	6	7	6	6	5	5	5	6	7	5	5	4	6	2	3	1	3	2	1	3	2	3	3	3	1	3	3	1	1	1	2	1	1	3	4	4	4	3	4	4	3	3	4	3	3
1	20	5	3	4	4	2	3	3	4	1	2	3	1	7	4	6	6	2	3	3	4	2	3	4	4	4	4	4	3	3	4	3	3	3	3	2	4	2	1	1	2	1	4	3	2	2	3	4	2
1	20	2	1	2	4	4	3	5	3	6	5	6	4	4	5	3	4	1	2	3	3	1	2	3	3	2	2	5	5	4	5	5	5	4	4	2	3	3	3	3	2	2	3	2	2	2	2	2	2
1	20	4	2	5	3	6	4	4	6	6	4	4	5	5	5	5	3	2	1	1	1	2	1	3	2	2	2	1	2	3	3	2	3	3	2	2	1	1	2	1	1	1	2	2	1	3	3	2	2
2	20	4	5	3	3	6	6	5	3	6	3	4	6	6	5	6	6	1	3	2	2	3	2	3	3	4	3	2	3	4	2	5	4	4	4	5	5	4	4	4	3	3	3	2	3	2	3	3	4
2	19	3	4	2	5	1	1	2	4	7	6	6	5	4	4	3	4	2	3	4	2	2	1	2	2	2	3	4	5	5	5	4	3	3	3	4	3	3	3	3	3	3	1	1	2	2	2	2	4
2	21	1	2	3	1	6	3	3	5	7	6	5	4	2	1	3	4	3	3	3	2	4	3	4	3	4	4	3	2	4	3	5	3	3	3	5	4	1	2	1	2	1	4	4	3	3	2	2	2
2	20	7	5	5	6	5	5	3	6	6	5	5	4	1	3	2	3	5	3	4	5	3	3	4	4	4	2	2	4	3	2	3	2	4	4	1	2	3	3	2	3	2	2	3	2	3	3	1	2
2	19	2	4	2	4	6	5	6	6	7	6	4	6	4	2	4	4	5	4	5	4	4	5	4	5	3	5	1	1	3	2	1	1	3	2	4	5	2	2	3	2	3	3	3	3	3	2	3	3
2	20	4	3	5	5	7	7	5	5	3	3	2	2	4	4	3	3	4	4	3	3	4	2	3	2	4	4	1	2	3	2	5	5	3	4	5	3	2	1	1	2	2	2	2	1	2	1	2	3
2	20	4	4	4	4	5	3	5	5	6	3	5	4	7	5	5	5	3	1	3	2	2	1	2	3	1	2	1	1	3	2	1	2	1	2	1	3	3	2	3	2	3	1	1	2	1	2	1	3
2	20	1	2	2	1	1	1	4	1	4	3	4	3	7	5	4	4	2	3	1	1	3	1	3	3	3	3	2	3	3	3	2	2	3	2	2	1	4	3	4	3	3	1	2	2	2	2	1	2
2	20	5	3	4	5	2	4	2	2	2	3	4	2	3	4	2	2	5	3	5	5	4	3	4	3	2	3	3	2	4	3	5	4	4	5	1	3	2	2	2	2	1	3	3	2	2	3	3	3
2	20	4	4	2	4	4	5	4	5	3	3	2	2	1	2	1	2	1	3	3	3	2	2	3	2	1	3	1	2	1	1	3	3	3	1	2	2	3	3	2	2	2	3	3	3	3	3	3	3
2	20	6	3	5	4	6	4	6	6	7	6	7	6	2	2	4	2	4	4	4	3	4	4	3	5	3	5	1	3	2	1	1	3	1	2	5	4	3	3	3	2	3	2	1	3	2	2	3	3
2	20	7	7	5	7	6	7	7	7	4	4	7	5	5	5	7	5	4	3	3	4	5	5	3	3	4	4	3	2	2	3	4	3	3	3	1	3	3	3	3	3	3	4	3	2	3	4	3	1
2	20	7	7	6	4	7	5	5	6	5	5	5	5	7	5	6	6	1	2	1	3	3	2	2	1	3	1	2	1	2	2	2	2	1	2	2	2	3	4	4	4	4	4	3	3	4	4	3	3
1	20	3	5	3	2	5	4	5	3	1	2	2	3	1	2	2	2	4	4	3	4	3	1	3	3	1	1	2	4	3	2	4	3	3	5	5	3	1	2	2	2	2	4	4	4	3	2	4	3
1	21	5	5	6	6	5	5	4	6	5	6	7	7	5	5	4	6	4	5	3	3	3	2	3	2	3	3	3	4	3	3	2	2	2	4	5	4	1	1	1	1	1	4	2	3	2	3	2	2
2	19	5	5	3	4	1	1	2	1	5	4	4	4	2	1	3	3	1	2	2	2	2	5	5	4	4	4	3	3	2	3	4	3	3	4	1	1	1	1	1	1	1	3	3	3	2	3	3	1
2	19.5	4	5	4	4	6	4	5	4	6	6	4	5	6	5	5	3	2	3	4	4	3	3	4	4	4	3	1	2	3	2	3	3	3	4	2	3	3	2	3	2	3	2	2	1	1	2	1	1
2	19	1	1	3	1	3	5	4	3	4	3	2	5	6	4	4	4	5	4	4	3	3	3	4	3	4	4	2	3	2	2	2	4	3	3	2	2	4	3	3	4	3	3	3	3	3	2	2	4
2	19	4	2	3	3	4	4	5	5	2	2	2	4	1	2	3	2	1	3	3	3	2	1	2	3	1	1	2	1	2	2	3	3	2	1	1	2	3	2	2	2	2	4	3	3	3	4	3	2
2	19	6	5	5	6	2	1	4	2	7	5	6	5	2	3	3	2	4	3	5	3	3	3	3	4	4	4	1	2	2	2	5	4	4	3	2	3	4	3	3	2	3	4	2	2	4	2	4	3
2	19	3	5	2	2	2	4	4	2	5	4	5	5	7	5	5	4	3	4	2	3	2	5	4	4	4	5	3	4	4	2	4	3	3	5	1	3	1	2	2	2	1	2	1	3	1	1	1	2
2	19	7	7	4	5	1	1	4	2	4	2	5	4	5	5	5	5	5	4	3	4	5	4	5	5	5	5	4	3	4	3	5	4	5	4	3	4	1	1	1	2	1	3	3	3	2	2	2	1
2	18	4	5	3	4	7	6	6	4	1	1	3	1	6	4	4	3	5	4	5	4	5	5	5	4	5	4	2	4	3	4	2	2	2	2	2	2	3	3	4	4	3	3	3	4	3	3	3	4
2	18	6	3	6	6	5	5	4	4	1	2	2	1	5	4	5	3	3	4	4	4	2	2	4	2	3	3	5	3	5	4	3	4	2	4	4	5	4	4	3	3	4	2	2	2	1	2	3	4
2	19	7	7	4	5	7	7	5	7	7	6	6	6	6	6	7	5	4	3	4	4	5	2	2	2	3	3	4	3	3	4	2	3	2	2	2	4	1	2	1	2	2	2	2	2	2	1	2	4
2	20	5	6	4	3	5	4	5	4	5	3	4	4	7	6	6	7	3	3	4	3	2	4	4	3	4	3	5	3	5	5	1	1	3	3	5	4	2	2	2	3	3	1	2	2	1	2	2	2
2	19	4	4	4	3	6	4	5	3	6	4	4	4	5	3	3	5	3	3	3	2	3	3	3	3	2	4	4	4	5	4	4	4	4	4	4	5	2	1	3	3	3	3	2	3	3	2	3	2
2	18	4	5	2	2	7	4	4	6	1	2	4	3	7	4	6	6	4	4	3	4	3	3	3	4	4	2	1	1	3	2	5	5	4	5	4	4	3	2	2	2	2	1	2	1	1	2	2	1
1	19	3	3	5	5	1	2	3	4	6	5	4	5	4	5	5	3	1	3	2	3	1	3	4	4	4	4	5	4	4	3	2	3	2	3	1	2	3	2	2	3	3	1	1	1	1	1	1	3
1	20	4	4	2	4	4	4	3	4	4	5	2	4	6	3	6	6	3	4	3	2	4	1	3	2	3	2	1	3	2	1	2	2	2	3	3	3	4	4	3	3	2	4	3	3	3	4	3	4
1	20	5	3	5	3	6	4	4	6	2	2	4	4	2	4	4	4	4	3	5	5	5	3	2	4	4	2	2	2	2	3	4	5	3	5	2	4	4	3	3	2	2	1	1	2	2	2	1	3
1	19	7	7	6	6	5	4	7	7	5	7	5	4	5	5	5	4	2	2	2	2	2	3	2	3	4	3	1	2	3	3	2	3	4	4	1	3	2	2	2	1	1	2	3	3	1	1	3	1
1	19	7	4	6	7	5	3	6	5	2	1	4	3	1	3	1	3	3	4	4	4	3	5	4	4	4	5	4	3	5	4	5	4	5	5	5	4	1	2	2	1	2	2	2	2	1	3	2	4
1	19	5	5	3	5	6	6	5	3	6	6	6	5	4	3	3	5	1	2	3	2	1	3	3	4	3	3	3	3	2	4	2	2	4	3	2	3	1	2	2	1	1	2	2	2	2	2	2	3
2	20	7	5	5	4	5	6	4	4	3	3	3	3	7	7	4	5	2	1	2	3	2	1	3	3	1	2	3	3	2	2	3	3	3	3	1	2	4	4	4	4	3	3	2	2	2	2	2	4
1	18	3	3	4	2	4	4	2	3	7	5	5	4	4	4	4	4	2	2	2	3	3	2	3	3	2	3	4	3	4	4	1	2	2	3	4	4	3	4	3	3	3	4	4	3	3	3	4	4
1	19	6	4	4	6	6	5	4	7	5	5	7	6	5	7	6	7	1	2	3	1	2	2	3	3	2	2	2	1	2	1	2	2	3	2	3	3	3	3	3	3	4	4	3	3	4	3	3	4
2	19	6	4	5	4	7	6	7	7	5	7	7	7	6	6	4	6	3	2	1	1	1	2	2	3	1	1	1	2	1	2	2	2	1	2	3	3	3	3	3	3	3	3	3	4	3	4	4	3
2	20	1	3	2	1	4	4	5	5	7	6	4	6	3	4	2	4	1	2	1	1	3	2	4	3	3	3	2	3	3	3	1	2	3	3	3	4	4	3	4	4	3	2	3	2	2	2	3	1
1	19	6	6	6	3	3	3	4	3	2	4	3	4	6	3	4	6	5	5	4	5	3	5	5	5	4	3	1	3	3	2	3	3	3	2	1	3	3	2	2	3	2	2	2	3	1	3	1	1
1	18	4	4	3	3	6	4	5	6	6	6	6	3	6	5	6	4	3	1	1	1	3	3	3	3	1	1	2	1	2	1	3	1	1	3	1	3	4	4	3	2	3	1	1	2	2	1	1	2
1	21	5	5	7	6	4	7	7	7	7	6	5	6	5	6	5	4	1	2	3	2	3	2	3	3	3	3	2	3	3	2	1	3	2	3	1	2	1	1	2	1	2	4	2	2	3	4	4	3
1	19	1	4	4	3	2	3	1	1	4	5	2	2	4	5	5	3	2	2	3	3	2	5	4	5	5	4	3	3	3	3	2	3	2	2	4	4	4	4	2	3	2	2	3	2	1	3	3	3
1	18	6	6	5	3	2	3	1	2	2	2	3	3	4	4	2	4	1	3	1	3	1	3	2	4	4	4	4	3	4	5	1	3	3	3	2	3	2	3	2	3	1	2	2	2	2	1	2	4
2	19	7	4	4	6	6	6	6	4	2	3	1	4	5	4	5	4	3	3	3	2	2	5	5	5	5	3	1	3	2	1	2	4	3	2	2	3	2	2	1	3	1	4	2	2	3	2	3	2
2	19	4	4	3	5	4	4	2	5	1	3	3	2	2	4	3	1	3	2	2	3	3	1	2	2	3	2	3	4	3	4	1	3	1	1	3	4	3	3	3	3	2	2	1	1	3	1	2	2
2	18	1	1	2	1	4	3	5	5	1	4	4	1	2	3	4	4	2	3	3	4	3	4	3	4	5	4	5	4	3	3	4	3	4	5	4	4	3	3	3	3	2	3	3	2	2	3	3	4
2	19	2	4	3	3	5	5	5	3	6	4	6	6	7	5	6	5	3	4	4	2	4	2	3	4	4	2	4	3	3	4	4	3	4	4	4	3	3	2	2	3	3	1	1	1	2	1	2	4
2	18	5	4	5	7	6	6	7	4	7	4	6	7	7	6	5	7	1	3	1	1	3	4	5	3	3	3	1	3	2	2	5	3	4	5	5	4	4	2	2	4	2	3	2	3	2	3	3	2
2	19	6	5	7	7	4	6	7	7	7	5	4	6	5	7	5	7	4	5	5	3	3	1	2	3	3	2	5	5	4	5	1	3	2	3	2	2	4	4	3	4	4	4	3	3	3	3	4	3
1	18	6	4	4	6	5	7	6	4	7	6	6	5	5	7	5	6	4	4	4	3	4	1	1	2	3	2	1	3	2	3	5	4	5	5	5	3	3	3	2	2	2	3	2	2	3	2	3	2
2	19	2	3	3	3	5	3	5	3	3	3	4	2	6	3	5	4	5	4	4	4	5	4	3	4	3	4	2	2	3	2	4	5	3	3	2	3	1	2	1	2	2	4	2	3	2	3	2	1
1	18	5	3	4	4	1	1	1	1	5	5	5	4	3	3	4	2	1	1	3	3	3	4	3	4	4	4	2	4	3	3	3	4	2	4	3	4	3	2	3	2	2	2	3	3	1	2	1	3
1	19	6	4	6	6	2	3	4	4	4	3	5	5	3	5	3	4	5	5	5	4	4	4	3	5	4	5	1	2	3	3	4	3	3	4	5	4	3	3	3	2	2	3	3	2	2	3	3	3
1	19	6	6	4	6	5	5	4	4	5	5	6	7	5	4	5	6	1	3	3	2	2	1	2	3	3	2	1	1	3	3	3	1	1	1	3	1	4	3	3	3	4	3	3	4	3	4	3	3
1	18	6	5	5	4	7	5	4	6	7	4	5	6	7	5	5	5	1	3	1	1	2	2	3	2	3	2	2	3	3	2	1	3	2	3	2	1	4	4	3	3	3	4	4	4	4	3	4	4
2	19	7	7	6	4	6	5	6	6	1	4	3	1	4	4	2	5	4	5	4	3	3	2	2	4	2	2	5	5	5	5	2	3	2	4	5	5	4	4	2	2	2	2	1	3	3	1	3	1
2	18	3	3	3	5	7	7	4	5	3	2	3	3	7	4	6	5	3	4	2	2	4	4	3	4	4	3	2	3	2	2	3	4	3	4	3	2	3	3	3	3	2	3	3	3	3	2	2	1
2	19	2	4	4	3	1	1	1	4	3	5	4	5	1	3	3	1	1	3	3	1	2	4	4	4	5	5	1	2	2	2	3	4	4	4	5	3	3	3	4	3	3	4	3	4	4	3	3	3
2	21	1	3	2	1	5	4	5	4	5	4	3	3	6	5	5	6	3	4	3	4	4	2	2	2	4	3	2	3	2	3	5	5	4	4	5	3	4	4	4	4	3	3	3	4	3	3	3	3
2	19	4	4	4	2	7	4	4	5	6	4	5	5	6	4	3	5	4	3	5	3	4	3	4	4	3	4	2	4	3	4	1	2	3	3	4	3	2	1	2	2	2	2	3	1	1	3	2	2
2	19	4	2	2	3	3	3	2	3	4	4	3	5	5	3	3	5	2	2	1	3	2	2	2	2	1	2	2	1	3	2	1	1	2	2	3	3	1	1	2	2	1	1	2	2	1	2	2	4
1	20	4	4	2	2	3	5	4	2	4	3	3	5	6	3	5	6	3	3	4	4	4	3	4	3	4	4	2	3	3	2	4	5	4	3	4	3	3	2	2	2	3	1	2	1	1	2	1	1
2	19	2	3	4	1	4	2	4	3	5	4	6	6	5	3	4	4	4	3	4	3	3	2	3	4	4	3	1	3	2	2	4	5	4	4	5	4	1	1	1	2	1	2	2	2	2	2	3	3
2	21	7	4	7	4	7	7	7	6	7	7	6	7	7	7	6	6	2	3	1	2	3	1	2	3	2	3	1	3	3	2	2	3	1	3	2	3	4	3	4	4	3	4	3	3	3	4	4	4
2	20	7	7	7	5	7	6	4	6	4	7	5	4	6	7	4	7	3	4	3	3	3	1	1	1	1	3	3	3	2	3	1	2	3	3	1	2	2	1	2	2	2	2	3	2	3	3	3	1
2	20	2	2	2	3	5	6	5	3	2	3	2	4	1	2	3	3	1	1	2	2	2	3	2	3	2	2	3	4	2	3	1	2	2	1	3	2	2	2	2	3	1	4	2	2	2	3	2	3
1	18	5	5	3	6	3	4	4	5	4	4	2	5	6	6	3	5	1	3	2	3	2	1	2	2	3	3	1	2	2	3	4	5	3	3	1	2	4	3	2	2	4	2	3	1	1	1	1	3
2	19	5	3	3	6	6	5	5	6	4	5	5	5	4	5	5	3	4	4	4	4	3	4	5	3	4	3	2	4	4	2	5	4	5	3	3	2	2	2	1	2	2	1	1	1	2	2	2	3
1	20	7	4	7	6	1	2	4	2	3	2	3	5	7	4	4	5	4	4	3	4	5	1	1	3	3	3	3	3	2	3	4	3	5	3	3	3	3	3	4	3	3	4	4	4	4	4	4	3
1	19	7	6	7	7	5	5	6	5	7	7	5	4	5	4	4	4	1	3	1	3	2	3	2	3	1	1	1	3	1	1	2	2	2	1	1	1	4	3	3	4	3	4	3	3	4	4	3	4
1	20	7	5	5	7	5	4	6	3	4	3	3	2	7	5	5	4	1	2	3	1	2	2	4	2	2	3	2	2	3	3	1	3	2	2	5	4	3	3	2	3	3	3	3	3	2	2	3	4
2	19	4	3	3	4	2	4	2	2	5	4	3	6	4	4	3	2	3	4	4	2	3	5	4	4	3	3	5	4	4	3	5	4	5	4	5	5	4	3	3	3	3	2	2	2	3	2	3	2
1	19	6	6	3	3	7	5	4	7	7	5	6	7	3	3	3	3	1	2	3	2	3	3	3	2	4	3	2	3	3	3	3	4	2	4	1	3	3	2	3	2	3	4	3	3	2	3	4	1
1	18	3	2	4	4	7	4	4	4	3	2	5	4	6	4	5	5	3	2	4	3	4	4	4	3	4	4	4	4	4	5	1	3	3	2	1	2	3	3	3	3	3	2	3	3	2	2	2	4
2	20	2	4	3	3	7	6	5	7	2	4	3	4	2	4	3	4	3	1	1	2	1	2	1	3	1	2	1	2	3	2	1	2	3	2	3	3	3	3	3	4	3	3	4	3	3	4	3	4
2	19	5	6	7	7	4	5	6	7	5	7	6	4	6	4	6	5	1	3	2	1	1	2	1	1	1	1	1	3	3	1	2	2	2	1	2	2	4	3	3	4	3	4	3	4	3	3	4	4
2	19	4	2	5	3	7	5	7	4	5	4	3	5	5	5	6	6	3	3	4	3	3	3	3	3	3	4	3	4	4	3	4	4	4	3	5	3	3	2	3	2	2	4	4	3	4	3	4	2
2	18	5	3	4	3	5	5	4	4	6	5	5	3	5	6	3	3	2	1	1	2	1	3	1	2	2	3	1	1	1	1	1	1	3	3	2	3	2	1	1	1	3	3	2	2	2	2	3	4
1	20	6	5	3	4	6	6	5	5	5	3	4	4	3	4	4	2	1	3	3	1	2	2	3	4	2	3	2	4	2	3	5	4	3	4	5	4	4	3	4	3	3	2	2	1	2	1	2	3
1	19	6	7	6	7	4	4	4	4	7	4	7	6	5	6	4	5	2	3	3	2	3	4	3	4	3	5	5	4	5	5	2	4	4	3	4	4	1	1	2	2	1	2	3	3	2	3	1	1
2	19	3	2	2	2	4	2	5	4	2	4	3	2	1	1	3	4	5	4	3	3	3	2	2	2	2	3	3	4	4	4	1	2	2	1	1	3	3	3	3	4	4	4	3	3	3	4	3	3
2	21	2	1	3	4	6	3	5	4	4	4	4	5	5	4	4	6	1	2	1	1	3	2	2	4	2	3	5	5	4	4	3	3	4	3	3	4	3	2	3	3	3	1	2	2	1	2	1	1
1	20	6	4	6	5	3	5	2	3	3	4	2	2	6	4	5	4	4	3	3	3	3	1	3	3	3	1	1	3	3	3	5	3	4	4	4	4	1	2	2	2	1	2	1	3	3	2	2	3
2	19	1	2	1	2	4	2	4	4	5	3	4	5	1	3	2	1	5	3	4	5	3	3	2	3	4	2	4	3	3	4	3	3	4	2	3	4	2	3	2	2	2	3	2	2	3	3	2	3
2	19	5	5	5	6	5	5	4	6	4	5	4	6	6	5	4	6	2	3	4	3	3	5	4	5	3	3	4	5	3	4	1	3	3	2	5	5	3	3	3	3	3	4	3	3	3	3	3	1
2	19	3	4	3	3	5	3	6	4	4	4	2	3	2	2	3	1	2	3	2	3	2	3	4	2	3	3	5	5	4	5	4	3	4	5	1	3	3	3	2	3	3	3	2	3	3	2	3	4
2	19	6	4	6	3	2	3	4	4	2	4	4	3	1	1	4	1	2	2	2	3	2	5	4	4	5	4	1	2	2	2	4	4	3	3	5	3	3	3	3	3	2	1	2	2	1	1	1	1
2	19	7	6	4	4	2	4	1	3	7	7	4	6	5	3	5	4	4	4	5	4	3	5	5	4	4	4	5	3	3	4	5	4	5	4	4	4	4	3	4	3	4	2	2	2	3	2	2	2
2	19	7	6	4	5	5	6	3	3	6	4	4	4	5	4	5	6	3	2	4	3	4	1	3	2	1	3	5	5	3	5	4	4	5	4	1	2	2	1	1	2	2	3	3	2	3	2	2	2
2	19	3	4	4	4	7	6	7	5	3	5	2	2	7	5	6	4	2	2	4	3	3	4	4	3	5	4	1	3	3	3	4	4	4	3	5	4	3	2	2	2	3	3	2	3	3	2	2	4
2	20	7	6	6	7	6	6	5	7	6	4	7	6	5	4	4	7	2	3	2	2	2	2	1	2	2	2	1	2	1	2	1	3	3	2	1	2	4	4	4	4	3	4	4	3	4	3	4	4
2	18	3	4	2	2	4	5	5	3	4	3	3	5	6	4	3	5	2	2	2	3	2	3	4	2	3	4	4	4	4	4	4	3	3	3	1	3	2	3	2	1	1	3	2	2	3	2	2	3
2	19	2	4	3	1	2	2	2	2	1	4	3	3	1	3	2	2	3	2	4	4	4	5	4	4	3	4	5	5	4	4	5	4	5	5	2	2	3	3	2	3	2	2	1	2	3	1	2	1
2	19	1	1	3	3	7	4	7	6	7	7	5	5	1	3	2	1	3	4	4	4	4	3	2	3	2	4	3	4	4	4	5	5	5	4	3	2	1	1	1	1	2	3	2	3	2	3	3	2
2	18	7	4	5	6	7	5	4	5	3	3	4	4	2	4	4	4	1	2	2	2	1	2	3	3	4	4	4	3	3	3	2	3	3	4	3	3	2	2	2	3	2	2	2	1	2	3	2	3
2	19	5	5	5	3	3	2	4	4	6	4	6	4	7	6	5	7	3	4	4	4	3	1	1	2	2	2	1	3	2	1	1	2	2	3	3	4	2	3	2	1	3	3	3	2	2	3	3	2
2	18	6	5	3	3	5	4	4	4	2	1	2	4	7	5	4	6	2	3	3	2	2	3	3	3	3	4	1	2	2	2	2	3	3	2	5	3	2	1	2	2	1	4	4	3	3	3	3	4
2	19	4	4	3	3	7	6	4	5	4	4	3	2	7	5	4	6	2	2	1	2	1	2	3	2	2	2	2	2	3	3	1	1	2	1	1	3	3	3	2	2	2	4	4	4	2	3	3	3
2	19	7	4	7	6	7	6	6	7	3	3	3	2	5	3	4	5	1	3	2	3	2	2	4	4	3	3	2	2	4	2	4	4	4	3	5	4	3	3	3	3	2	4	4	3	4	2	4	4
2	19	2	4	4	1	1	1	2	3	4	5	3	5	2	4	2	3	4	3	4	3	3	3	3	4	2	3	2	2	2	2	3	2	2	4	5	5	2	3	2	1	1	1	2	2	1	2	2	2
2	19	5	4	5	3	7	5	4	6	2	4	2	3	2	1	3	4	1	2	2	3	2	2	3	2	3	2	4	4	4	3	3	3	4	3	5	4	4	3	3	2	4	3	2	3	3	2	3	4
2	19	3	3	3	3	6	4	5	6	1	3	3	4	2	4	3	4	5	4	5	4	4	1	3	3	2	3	5	5	5	4	1	3	3	2	3	4	3	2	2	3	3	1	2	1	1	1	2	1
2	19	4	3	4	4	6	4	6	4	1	2	2	2	6	6	3	3	2	3	4	4	2	1	3	2	3	3	5	3	4	4	4	3	4	3	1	3	2	1	1	1	3	2	3	3	2	2	2	3
2	19	4	5	4	5	2	2	2	4	1	4	3	1	7	4	4	4	3	4	3	3	3	4	4	5	5	3	3	2	3	4	3	3	4	3	2	3	4	2	3	3	2	1	1	2	2	2	2	4
2	19	5	4	6	4	4	5	4	4	6	4	6	4	2	1	3	3	2	2	2	4	3	2	2	2	3	2	2	2	4	4	1	2	2	2	2	2	3	3	2	2	3	4	3	2	4	2	4	2
2	19	4	3	3	2	5	5	3	6	4	5	2	4	2	4	2	4	4	4	4	3	5	2	2	2	2	2	2	2	2	2	4	5	4	4	2	4	3	3	3	2	3	1	2	2	2	2	1	1
2	19	7	6	5	4	6	5	5	6	2	4	2	4	7	4	5	4	2	3	3	2	3	3	4	2	3	2	1	3	2	1	5	4	3	5	5	5	4	3	4	4	4	3	3	3	4	3	3	4
2	18	6	5	6	6	7	4	7	7	4	7	5	4	6	5	6	7	4	3	3	4	3	3	4	2	3	3	3	3	3	3	3	3	3	2	2	3	1	2	2	2	1	2	2	1	2	2	1	1
2	19	4	4	4	3	7	4	4	4	2	3	2	4	3	5	2	3	2	3	3	2	4	4	3	3	3	4	4	4	5	3	2	3	3	2	1	1	4	4	3	2	3	2	1	2	2	2	2	1
2	19	6	4	5	7	5	7	5	6	6	5	6	7	5	5	6	5	1	1	1	2	3	2	2	3	3	3	2	1	2	2	2	3	3	1	1	2	4	4	3	3	3	4	3	4	4	4	3	3
2	19	1	2	1	1	5	4	5	5	1	2	1	4	3	3	3	3	4	3	3	4	4	3	4	4	3	4	3	2	3	2	5	4	5	4	2	2	3	3	3	3	4	3	3	3	4	4	3	4
2	18	5	3	3	3	6	5	4	5	7	5	6	6	2	4	3	2	2	2	3	3	3	4	5	5	5	4	3	4	3	4	3	2	4	4	2	3	1	1	1	2	1	4	3	2	3	3	3	2
2	18	3	2	3	3	5	6	3	6	7	5	7	6	5	4	6	3	2	1	3	3	1	1	1	1	2	3	2	1	2	1	2	3	2	3	1	3	4	4	3	4	2	2	3	2	2	3	2	3
2	19	3	3	2	3	6	6	6	3	7	6	6	5	2	2	1	2	3	2	3	4	2	4	4	3	4	3	3	3	2	3	1	2	3	3	2	3	1	2	2	1	1	3	2	2	3	3	3	2
2	19	6	4	3	4	7	6	6	6	4	3	2	5	4	4	2	4	5	3	4	4	4	4	5	4	3	3	3	2	3	2	3	4	3	4	2	3	2	1	2	2	3	3	3	3	2	2	3	1
2	19	6	6	4	4	5	6	5	5	5	4	4	4	7	5	7	6	2	4	3	4	2	2	2	3	3	2	2	3	3	3	4	4	5	3	2	3	2	2	2	3	2	3	2	2	3	2	2	2
1	20	2	4	1	4	5	4	3	4	7	4	4	6	5	4	5	3	3	2	3	4	4	1	3	2	3	1	2	2	3	3	1	2	3	3	5	4	2	2	3	2	2	4	2	2	3	3	3	4
1	19	2	3	4	2	3	5	2	4	5	6	4	4	5	4	6	5	2	3	3	3	4	4	3	3	4	4	2	4	3	2	2	2	3	3	1	3	2	3	2	3	2	2	2	2	2	1	2	2
1	19	2	3	1	3	1	3	3	1	1	2	2	3	6	3	5	4	3	3	2	2	3	1	3	1	2	3	4	4	3	4	2	3	2	2	4	4	3	3	3	3	2	3	2	2	3	3	2	2
1	20	2	2	2	3	6	5	5	6	3	2	4	5	5	5	4	3	4	3	5	5	3	1	3	2	1	3	1	3	3	2	2	2	3	3	3	4	1	2	1	2	2	3	2	2	3	3	3	1
1	20	4	4	5	5	5	4	4	3	1	1	1	1	4	5	3	5	1	3	3	1	1	3	2	3	3	1	2	2	1	2	2	2	2	1	1	3	3	2	2	2	3	2	2	1	1	2	2	4
2	20	1	4	4	4	5	3	4	4	7	4	4	5	4	5	2	2	1	3	1	3	2	3	3	2	2	2	2	2	2	2	1	2	3	2	3	3	4	3	4	3	4	3	2	3	2	2	2	1
2	21	5	7	5	7	7	4	5	6	6	6	7	7	6	4	7	7	1	2	3	3	2	1	2	1	1	3	2	3	2	2	2	1	2	2	1	1	3	3	4	4	3	3	4	4	4	3	4	4
2	18	5	4	4	5	4	5	7	7	4	4	5	4	5	6	7	4	3	1	1	2	1	2	2	3	3	1	1	3	3	1	1	3	3	2	2	3	4	3	3	3	3	3	3	3	4	3	3	4
1	20	3	2	2	2	4	5	3	3	4	4	4	3	3	3	4	2	1	2	1	3	2	3	2	2	2	4	5	5	4	4	5	5	5	4	2	4	4	3	4	4	3	4	4	3	3	4	3	4
2	20	5	4	4	5	5	5	6	4	7	4	6	7	4	5	7	7	1	3	1	2	1	2	2	2	3	1	1	1	1	1	1	3	1	1	1	1	4	3	3	4	3	4	4	3	4	4	4	4
2	18	7	5	7	5	3	2	5	2	1	3	2	2	6	6	4	4	2	2	3	3	2	1	2	3	2	2	2	2	2	1	1	1	2	1	2	2	3	4	3	4	4	4	3	4	3	3	3	4
2	18	4	4	4	5	6	6	4	5	5	5	3	5	5	5	4	5	2	3	3	4	3	2	3	3	3	2	5	3	3	5	1	3	1	3	1	3	4	3	4	3	3	1	2	2	2	1	1	3
2	18	4	5	5	3	1	1	4	2	3	4	2	5	3	2	2	2	2	1	1	2	2	1	3	3	3	2	3	3	1	3	1	1	2	2	1	2	3	2	2	2	3	4	3	4	2	3	4	4
2	20	5	5	5	3	1	1	1	1	3	2	2	2	1	4	1	2	4	3	4	4	5	2	3	4	2	3	3	3	4	2	1	2	1	3	2	2	2	2	1	3	2	1	2	2	1	2	2	3
2	19	2	1	3	1	6	3	4	6	7	4	6	4	3	2	3	3	1	2	3	1	1	4	3	5	3	3	4	3	4	3	1	1	3	3	1	3	3	2	3	3	2	2	1	2	3	2	2	2
2	18	5	5	4	3	2	3	4	4	3	2	2	2	2	4	2	4	2	2	2	3	2	2	2	3	2	3	5	3	4	3	2	3	2	2	2	3	1	1	2	2	2	3	3	3	3	2	2	2
2	19	7	5	6	6	7	5	5	6	7	4	5	4	7	7	6	4	2	1	2	1	1	2	1	1	2	1	1	1	3	3	2	2	3	1	3	2	3	3	3	4	4	3	4	4	3	4	4	3
2	19	2	4	4	3	3	4	2	4	2	2	4	4	5	3	3	5	5	3	3	3	4	1	1	2	2	3	3	4	4	3	4	4	3	3	3	4	3	3	2	3	3	1	1	2	1	2	2	4
2	19	3	3	2	4	3	2	2	4	1	1	1	1	2	4	3	1	5	3	5	5	3	3	4	4	2	3	4	3	4	3	3	3	3	2	2	2	1	2	2	2	1	1	1	2	2	1	1	3
2	20	6	6	4	6	3	3	4	3	1	2	3	4	2	3	1	2	4	5	3	3	4	4	3	5	3	4	1	3	3	1	2	3	3	3	5	5	2	2	2	2	3	1	2	1	2	2	2	3
2	19	1	2	2	1	7	5	4	4	1	4	1	3	3	3	3	3	2	2	4	3	3	1	3	2	3	3	3	3	4	2	3	3	4	4	5	4	2	2	3	3	1	1	2	1	1	1	1	2
2	20	4	2	4	4	7	7	7	4	7	6	7	6	6	5	6	6	1	3	2	2	2	4	3	3	4	5	2	2	3	3	4	4	5	5	2	3	4	4	3	2	3	3	2	2	2	3	2	1
2	19	4	7	7	4	7	6	4	6	7	5	6	4	6	6	5	5	2	1	1	2	2	2	2	2	3	3	2	3	1	3	3	2	2	2	1	2	3	3	4	3	4	3	3	3	4	4	4	4
1	21	6	4	4	6	5	5	5	5	6	6	4	5	6	5	6	5	2	3	2	1	1	3	1	3	3	1	3	1	1	1	1	3	3	3	1	1	1	1	2	1	1	3	3	3	3	3	3	2
2	20	4	3	5	3	6	5	3	6	5	4	3	4	3	4	4	5	4	4	4	5	5	1	3	2	3	3	2	2	4	2	1	3	2	1	4	5	3	2	2	2	2	2	1	3	2	1	2	3
2	20	7	5	5	4	4	3	5	4	4	5	3	5	6	4	5	5	5	4	3	5	5	1	3	2	2	2	2	3	4	4	3	2	3	3	2	3	4	3	3	4	2	3	3	3	3	2	3	2
1	19	2	4	2	2	4	5	4	4	7	5	5	4	6	4	5	6	2	3	1	1	2	2	2	3	2	2	3	3	1	1	2	2	3	3	1	3	2	2	3	2	2	2	2	2	3	2	3	3
1	21	7	4	6	5	6	4	7	4	6	4	7	5	6	5	7	4	2	2	2	1	1	2	2	1	2	1	1	2	3	1	2	2	1	2	2	2	3	3	4	4	4	4	4	4	4	3	3	3
2	21	7	5	6	7	7	7	6	4	4	5	4	5	5	7	6	7	1	3	1	3	3	2	4	4	3	2	5	4	5	3	2	2	2	2	4	3	1	2	2	1	1	1	2	1	2	1	2	2
2	19	7	4	7	7	7	6	6	7	5	6	5	7	5	5	7	4	2	1	1	3	2	2	2	2	2	1	2	2	2	1	2	3	1	2	1	3	3	3	3	4	3	3	3	3	3	4	3	3
2	20	5	5	5	5	6	6	6	6	1	1	3	1	3	2	3	4	5	4	5	3	5	5	4	4	4	3	1	3	1	3	2	3	2	3	3	4	2	3	3	2	3	1	1	2	2	1	2	2
1	21	5	7	5	7	5	4	7	7	7	5	7	7	5	5	7	7	2	2	2	3	3	1	1	3	3	3	4	3	5	3	2	4	2	3	1	3	4	2	3	2	3	4	2	3	3	3	3	1
1	20	3	3	5	2	7	6	7	6	1	4	3	3	6	4	3	6	2	2	4	2	3	1	3	2	3	1	5	5	3	4	3	4	2	4	4	5	3	3	3	3	2	2	1	1	2	2	1	3
2	19	6	5	6	6	2	4	3	4	1	2	2	4	5	3	3	6	4	5	4	4	3	2	2	3	3	4	4	4	3	3	2	3	3	3	5	4	3	2	2	3	2	3	3	3	2	2	3	4
2	19	3	3	5	3	4	4	5	3	5	5	4	3	7	4	4	4	2	2	2	2	2	4	3	4	3	4	2	4	4	3	1	3	3	3	2	3	2	2	2	2	2	3	3	3	3	3	3	1
2	20	7	7	4	4	7	4	6	7	7	6	6	6	5	7	5	6	1	3	2	3	2	2	3	2	2	2	4	4	5	4	3	3	2	4	3	3	4	2	3	4	2	2	2	2	1	1	2	2
2	19	7	7	5	4	1	3	3	2	7	5	4	5	5	5	6	3	2	2	4	4	3	3	3	3	3	4	2	3	4	2	4	3	5	3	3	3	2	2	2	2	3	2	1	2	1	3	2	1
1	20	2	4	1	3	5	4	5	3	2	4	1	4	2	4	3	3	3	4	3	4	4	2	4	2	3	2	2	2	2	2	5	3	4	3	3	4	4	2	3	4	2	2	3	3	3	2	2	4
2	19	1	1	2	3	4	4	4	3	4	4	5	3	5	4	5	3	2	3	3	3	2	4	3	5	5	4	2	3	2	2	2	3	2	3	5	5	4	3	2	2	3	4	4	4	3	2	4	2
2	21	6	6	6	7	6	4	7	5	7	4	5	4	6	6	5	5	2	3	3	2	2	1	1	1	2	2	1	1	3	3	1	1	2	1	1	1	3	3	4	3	3	3	4	4	4	4	3	3
1	20	3	2	4	4	6	3	6	4	5	3	6	5	2	4	2	2	1	2	2	1	1	1	1	2	1	2	2	3	1	3	2	2	3	2	1	1	3	3	2	3	2	3	3	3	2	2	2	2
1	20	2	2	2	4	7	4	5	6	2	4	3	3	7	4	6	6	3	4	2	3	3	4	3	3	4	3	2	2	4	2	1	2	3	1	2	3	3	3	4	4	4	3	3	3	3	4	3	4
1	20	6	6	6	5	1	1	2	1	5	5	5	3	3	2	2	3	3	2	2	4	2	5	5	3	5	4	3	4	4	3	1	2	2	2	3	4	3	3	4	4	4	4	3	3	3	4	4	4
1	20	6	4	4	6	5	5	6	5	6	4	6	5	5	4	7	4	2	2	3	4	2	2	3	3	2	4	5	3	3	4	1	3	3	2	5	5	3	2	2	2	3	2	1	1	1	1	2	3
1	20	1	1	2	3	2	4	3	1	3	3	4	2	5	4	4	4	2	4	4	4	2	3	3	2	2	4	1	2	2	1	1	2	3	3	4	5	2	2	1	1	3	1	1	2	2	2	2	2
1	20	3	3	4	4	2	3	2	2	6	4	3	6	6	4	4	6	1	1	3	1	3	1	3	2	1	3	5	3	4	3	3	2	3	3	5	3	4	3	2	3	2	1	2	1	1	2	1	2
2	19	2	3	2	4	5	6	6	4	6	5	4	6	5	4	3	3	3	3	4	4	3	3	3	2	4	2	4	5	4	4	1	2	3	3	5	4	2	3	3	2	2	4	3	3	3	4	4	4
1	21	7	4	7	5	3	4	5	5	6	6	5	5	3	3	2	2	3	3	3	3	3	1	3	2	3	2	5	4	5	5	2	2	3	4	5	5	4	4	3	2	4	3	2	3	2	3	2	4
1	20	1	3	1	4	7	6	4	4	4	3	4	4	3	3	2	2	2	3	3	4	2	2	4	4	3	3	4	3	5	4	5	3	5	4	4	4	4	4	2	4	3	3	3	3	2	2	3	3
1	19	6	5	6	6	5	4	4	4	5	4	3	4	1	1	3	3	3	3	4	3	4	2	4	4	2	2	5	5	4	3	5	5	4	3	2	2	4	3	3	3	3	2	2	2	2	2	2	4
2	20	2	1	4	2	3	4	4	5	6	3	5	5	3	3	3	4	4	4	4	3	5	2	4	2	4	3	2	4	2	2	2	2	3	4	2	3	1	1	2	1	1	1	2	1	2	2	1	1
2	20	5	6	3	5	1	3	1	1	6	5	6	5	3	4	2	4	3	3	3	4	2	3	4	2	3	2	5	3	3	4	4	3	3	4	2	3	4	2	4	3	3	4	2	2	3	4	3	4
1	20	7	7	6	6	5	6	5	4	6	6	6	7	4	6	6	6	1	2	2	2	2	1	3	2	2	2	3	1	1	2	1	2	2	2	2	1	3	4	4	4	3	4	3	3	3	4	3	4
2	19	3	2	3	3	1	1	4	2	4	2	5	5	4	4	2	3	4	3	4	3	5	1	3	3	3	2	2	3	4	3	2	4	4	2	2	2	2	2	3	2	2	4	3	2	3	3	3	1
2	20	3	2	4	3	1	2	3	3	3	2	2	3	6	3	5	6	1	2	2	3	2	5	5	4	3	4	5	4	4	5	1	2	3	2	4	3	2	3	1	3	3	1	2	1	1	1	2	2
1	21	4	5	4	4	2	4	2	3	7	4	4	7	5	5	4	4	2	2	2	4	3	2	2	2	3	4	4	3	3	4	5	5	5	4	2	4	2	1	2	3	1	2	2	3	2	2	2	1
1	21	2	1	3	3	1	2	4	2	1	3	1	3	5	3	5	5	3	4	3	2	3	2	3	3	2	2	5	5	5	4	3	4	4	4	2	3	3	2	2	3	2	3	3	2	2	2	3	1
1	20	7	4	5	5	7	7	5	7	4	4	4	4	7	5	6	5	5	3	3	4	5	2	4	3	3	4	2	3	2	2	2	2	2	4	5	5	4	3	4	3	3	2	2	2	2	3	1	1
1	22	3	4	4	3	2	3	4	2	6	6	4	3	2	1	4	1	3	2	4	4	2	4	3	3	3	4	4	5	5	3	4	3	4	3	1	3	4	2	3	2	4	4	3	4	3	2	4	1
1	20	7	6	7	4	6	4	3	5	7	6	5	7	7	6	6	7	3	4	3	4	4	3	3	3	4	2	4	4	4	5	4	4	3	4	1	2	2	2	3	2	2	3	2	3	2	3	3	2
2	20	1	2	4	3	1	3	2	2	3	5	3	4	6	5	5	5	1	3	3	2	3	4	3	5	3	5	3	2	3	3	4	3	3	3	5	4	2	3	3	2	3	1	1	1	2	1	1	3
2	20	4	5	5	4	5	5	4	5	7	6	4	7	2	2	3	4	2	3	4	2	2	2	3	3	2	2	2	3	3	4	5	4	4	3	4	3	4	3	3	3	3	3	2	3	3	2	3	2
1	20	2	3	3	3	1	1	3	1	2	4	4	3	4	5	3	5	4	4	3	5	4	3	3	4	3	4	2	3	2	3	2	3	3	2	5	4	2	2	2	2	1	2	3	2	2	1	2	3
2	20	4	5	4	2	3	3	3	3	2	1	2	3	2	3	3	4	1	2	3	3	2	1	2	3	3	1	2	3	3	4	2	2	2	3	4	4	2	1	2	2	1	1	1	1	1	2	1	1
2	20	5	5	4	3	4	3	5	2	3	3	5	5	6	4	6	6	2	1	2	2	2	1	2	1	2	3	2	3	1	1	1	1	2	3	2	1	1	2	1	1	1	2	3	2	1	2	3	4
2	20	4	5	4	3	2	2	1	4	5	4	5	4	7	5	5	5	1	2	2	2	2	1	3	3	3	2	2	1	3	2	2	2	3	2	2	2	1	2	1	2	1	2	2	1	2	1	2	4
2	20	4	4	4	6	6	4	5	5	4	6	5	4	6	5	4	4	2	1	1	1	2	1	1	1	2	1	2	3	3	2	2	1	3	2	1	3	3	4	4	4	4	4	3	4	3	4	4	4
2	19	6	6	4	6	4	4	2	2	3	4	5	3	2	2	1	1	1	3	1	3	3	5	3	3	4	3	4	3	5	5	3	3	3	4	5	4	3	3	2	3	3	4	3	4	4	4	2	4
2	20	5	4	7	4	5	6	4	5	5	7	7	6	6	5	6	6	4	3	5	4	4	1	1	2	1	2	4	4	4	4	2	2	3	2	2	2	4	3	4	2	3	3	2	2	2	3	3	1
1	19	5	5	4	3	2	2	4	1	4	4	5	2	2	3	3	4	1	2	3	2	2	2	2	2	2	2	1	3	3	1	3	3	1	1	2	2	4	3	3	4	4	3	2	3	3	2	3	4
1	19	6	5	4	3	6	5	6	3	3	3	2	3	7	5	5	4	1	1	3	3	1	1	2	3	2	2	4	3	4	3	1	1	3	2	5	3	4	3	4	4	3	3	3	4	3	4	3	4
1	19	6	6	6	7	4	4	5	5	5	4	6	5	5	5	4	5	1	2	1	1	3	1	1	1	1	1	2	1	1	2	1	3	2	3	1	1	4	4	3	3	4	4	4	3	3	4	4	3
2	18	2	2	2	4	4	3	3	5	5	3	5	4	3	4	2	3	1	1	2	1	1	1	2	1	2	2	3	1	3	1	3	3	3	3	3	3	3	2	2	2	2	4	2	3	3	4	2	1
2	18	4	5	3	4	3	2	2	3	2	2	1	2	3	5	3	3	1	1	3	3	2	1	2	3	3	3	4	4	4	4	2	4	2	2	2	2	1	1	2	2	2	2	3	2	2	1	2	4
2	19	5	4	4	3	5	4	6	5	7	4	7	5	7	6	5	5	2	2	3	4	3	3	2	4	4	3	5	5	3	5	4	3	5	4	3	3	4	2	3	2	4	3	3	3	2	3	3	1
2	19	2	1	2	3	5	3	3	3	1	3	1	2	2	1	2	4	5	3	5	4	5	4	5	4	3	4	1	3	2	2	1	2	2	2	3	4	3	2	2	2	2	3	2	3	2	3	3	3
2	19	4	4	4	2	5	4	3	6	6	5	3	3	6	5	6	4	5	5	4	4	3	4	3	4	4	5	1	2	3	3	4	3	3	3	1	3	4	3	3	3	3	4	3	4	3	3	4	3
1	19	5	3	5	4	4	3	4	4	7	7	6	5	6	6	5	5	1	2	2	2	1	1	2	3	3	2	1	2	2	3	2	2	2	4	2	2	4	4	3	3	3	2	3	1	3	1	3	3
1	19	1	3	2	3	2	2	2	4	4	3	5	4	3	3	3	4	2	3	1	1	2	1	1	3	3	3	3	1	1	1	1	3	2	2	1	1	1	2	1	1	2	3	2	2	2	3	3	3
1	19	2	4	1	3	2	2	3	4	3	3	4	3	7	5	6	4	1	1	3	1	3	3	3	3	2	3	2	2	3	2	2	2	1	2	1	1	2	3	3	2	2	4	3	4	2	3	3	3
2	19	4	4	3	2	6	4	4	4	4	5	3	4	4	5	5	5	2	2	1	3	3	1	1	1	1	1	3	3	1	3	1	2	3	1	2	2	1	2	2	2	2	4	4	3	3	2	3	4
2	19	2	2	4	2	1	3	4	4	3	4	2	3	5	6	6	3	1	3	2	1	3	2	2	2	1	1	1	3	3	1	3	1	3	1	3	2	4	3	3	2	3	4	3	3	4	4	3	4
2	19	7	6	4	4	5	6	5	7	7	5	6	5	5	4	6	7	2	2	2	2	2	2	3	3	3	1	1	3	2	1	2	2	3	2	3	3	3	4	3	3	3	3	3	4	3	3	3	4
2	18	6	5	7	4	5	5	5	6	6	4	6	7	5	5	5	5	4	4	3	5	4	3	3	4	2	3	5	5	5	5	5	3	5	4	2	3	2	3	2	2	2	3	2	2	3	2	2	3
2	18	5	3	4	4	6	3	5	6	2	2	2	3	5	5	4	3	5	5	4	3	5	2	4	3	2	2	5	4	5	4	2	4	2	3	5	5	4	3	2	2	2	2	3	3	3	3	2	3
2	19	5	5	5	5	3	4	4	2	3	2	4	4	3	3	2	3	3	2	3	3	4	5	5	5	5	3	5	4	4	3	1	3	2	3	1	2	4	3	2	4	3	2	3	3	3	3	3	3
2	19	6	5	6	4	3	3	4	4	3	2	4	3	2	4	4	3	4	5	3	4	3	3	3	2	3	4	4	3	5	3	5	4	4	4	2	2	2	2	2	2	3	3	3	2	2	2	3	1
2	19	3	3	3	3	6	6	6	4	5	3	3	4	3	2	2	4	2	3	2	2	3	3	1	1	3	1	1	3	1	1	1	1	3	3	1	1	2	2	2	2	2	1	2	2	2	2	2	4
2	18	7	4	6	7	5	5	5	5	6	4	7	5	7	4	6	5	1	2	3	3	1	1	3	1	3	1	2	3	3	3	1	1	3	1	2	1	4	3	4	3	3	3	4	4	3	3	3	3
2	19	2	1	3	2	7	4	4	7	7	4	7	6	2	3	4	2	2	3	3	2	2	5	5	5	4	5	2	4	2	3	3	3	4	4	5	3	1	1	2	1	1	2	2	2	3	1	1	1
1	18	6	5	3	4	1	3	2	3	2	2	4	3	6	4	5	3	4	3	3	4	4	2	2	4	3	3	4	4	3	4	4	4	4	4	2	3	1	1	1	1	2	1	2	1	1	1	1	2
1	20	1	4	2	3	2	3	4	4	5	4	5	3	4	5	5	3	5	5	4	5	4	3	4	4	4	3	3	4	4	4	2	2	2	4	2	2	2	1	2	2	1	4	2	2	3	4	3	3
1	19	7	6	5	4	7	5	5	4	4	7	4	6	6	5	4	7	1	1	2	1	1	1	3	3	2	1	1	2	1	2	2	2	2	2	1	2	4	3	4	3	3	4	4	3	4	3	4	3
2	19	4	4	2	5	5	5	5	5	3	4	5	2	7	4	7	5	2	3	3	2	2	2	2	4	3	3	4	5	4	5	4	4	3	3	2	4	3	2	2	2	3	2	1	2	1	3	2	2
1	20	5	5	4	3	5	5	5	3	7	4	6	7	5	4	5	6	1	1	3	1	3	1	1	2	3	2	2	3	2	4	1	3	2	2	3	4	3	2	3	2	2	2	3	1	2	1	2	1
2	19	4	2	2	5	1	2	4	2	2	4	4	4	4	4	3	4	2	3	2	2	2	2	3	2	1	3	3	2	2	3	1	1	1	1	3	3	2	2	2	2	1	2	3	2	2	2	2	3
2	19	5	6	3	3	1	4	3	2	3	3	4	3	3	4	4	3	3	3	4	3	3	5	5	5	4	5	3	4	3	2	5	5	4	3	5	4	4	3	3	3	3	4	4	2	3	3	2	2
2	18	3	3	2	2	5	6	4	3	6	6	6	5	6	5	6	5	4	4	5	3	3	5	3	5	4	5	3	2	2	3	4	3	3	3	1	2	3	3	2	2	3	4	4	4	2	3	3	2
1	18	5	5	4	4	7	4	7	5	5	5	6	5	7	6	4	4	3	2	4	4	3	4	5	4	4	5	2	3	3	3	5	5	4	4	3	2	3	3	2	2	3	4	4	3	3	4	3	2
1	19	7	6	6	5	2	2	2	1	2	3	3	2	5	5	3	4	4	4	3	5	3	3	4	4	3	2	3	3	4	4	3	3	3	4	3	4	4	3	3	4	2	2	2	1	3	2	2	2
1	19	7	4	4	5	4	5	4	3	5	6	5	5	6	5	4	5	2	2	2	2	3	2	2	3	3	3	5	5	4	5	3	2	3	3	5	4	3	2	3	3	3	2	2	1	3	2	2	1
1	18	7	6	4	5	7	6	5	7	7	4	4	4	5	5	5	5	3	3	4	3	3	5	4	4	3	3	3	3	4	3	4	4	5	4	1	2	4	3	2	4	4	3	2	2	3	3	2	4
2	19	3	2	4	4	4	4	3	5	3	4	4	3	4	2	3	3	2	4	3	4	3	1	2	2	3	3	1	3	2	1	3	4	4	3	2	4	4	2	2	3	2	4	4	3	2	4	4	2
2	19	6	7	5	5	7	6	7	7	7	4	6	7	6	4	4	6	2	1	2	1	1	2	2	1	2	3	2	3	2	1	2	2	1	2	1	3	4	4	4	3	4	3	3	3	4	3	4	3
2	20	5	4	3	4	2	2	2	2	5	3	6	6	6	6	4	6	4	4	3	3	4	1	2	1	2	1	1	1	2	1	2	3	2	3	5	3	3	4	3	3	3	4	4	3	4	4	4	3
2	18	4	5	4	5	7	7	4	6	1	2	3	3	6	6	3	5	2	2	2	2	2	1	3	1	2	1	3	2	3	1	2	3	3	3	1	2	3	2	2	3	3	4	2	3	4	4	2	2
2	20	5	4	4	3	2	2	3	2	6	6	5	5	3	2	2	2	5	5	5	3	4	3	4	2	2	3	2	4	2	2	5	4	5	4	4	4	1	1	2	1	1	1	1	2	1	1	1	2
2	18	3	3	2	4	7	5	6	4	5	4	3	4	1	3	1	3	4	5	4	3	3	2	3	2	2	4	4	3	5	3	4	5	4	4	1	2	1	1	1	2	2	1	1	2	2	1	1	2
2	19	7	5	6	6	7	5	6	6	2	4	3	2	3	4	4	2	2	3	3	2	2	3	3	4	4	4	2	3	3	2	2	3	3	3	1	3	2	1	2	2	3	3	2	2	2	3	2	1
2	18	4	3	3	5	2	1	3	3	1	3	3	3	5	4	4	3	1	2	2	3	1	3	4	4	2	4	3	3	2	3	2	2	2	4	4	3	3	2	2	3	3	3	2	3	2	3	3	3
2	19	6	4	4	6	3	3	4	4	7	6	4	6	3	5	3	3	2	3	2	4	3	3	2	4	4	4	5	4	3	4	4	3	5	4	5	5	2	3	1	2	3	4	2	4	3	2	2	2
2	19	2	4	1	2	2	4	4	4	6	4	6	5	6	4	3	3	2	3	3	3	2	1	1	3	1	1	4	4	3	3	1	2	1	2	2	3	1	2	1	2	1	1	1	2	1	1	2	4
2	19	7	6	6	5	5	3	3	3	5	3	5	4	7	6	4	4	5	5	5	4	3	5	5	4	4	5	2	2	4	3	2	2	4	3	2	3	1	1	2	2	1	4	2	4	3	2	3	2
1	19	6	7	6	5	7	5	4	6	6	5	7	7	5	5	5	6	3	2	2	4	4	2	2	4	3	2	4	5	4	4	2	2	2	2	5	4	4	3	4	3	3	4	2	3	4	3	3	1
1	18	1	2	3	3	4	4	4	3	5	4	4	4	4	4	4	3	3	3	1	2	2	1	2	1	3	1	2	1	2	2	3	3	2	3	2	2	3	3	2	2	2	3	2	3	3	3	2	3
1	19	5	3	3	3	3	2	5	4	4	3	5	5	3	3	5	4	5	5	5	4	4	2	3	2	2	2	3	3	2	4	1	2	3	2	5	5	1	2	2	2	2	2	1	2	2	3	2	3
1	19	3	2	3	3	2	2	2	4	4	5	4	4	1	4	1	2	2	3	2	3	3	4	4	4	5	3	5	5	3	5	2	3	2	3	4	3	1	2	2	2	1	2	2	2	1	2	1	4
1	19	2	3	3	2	7	7	6	4	4	5	4	5	6	5	3	4	1	1	3	1	3	2	2	2	3	3	3	3	3	1	3	3	1	3	2	2	3	2	2	2	2	3	3	3	2	2	3	1
1	20	4	2	4	2	4	4	3	3	5	4	4	3	3	2	2	2	5	5	5	3	5	2	2	2	2	3	1	1	3	3	3	4	3	4	4	3	1	2	1	1	1	1	2	2	1	2	2	4
1	19	1	4	3	1	1	4	3	1	5	4	3	5	1	2	3	2	2	2	3	3	3	4	5	3	5	4	3	4	4	2	4	3	5	3	1	3	2	2	2	1	2	1	1	2	1	2	1	1
1	19	6	6	4	6	6	5	4	5	3	4	4	2	6	5	5	6	1	3	1	3	2	5	5	4	4	4	5	4	4	3	2	3	4	4	5	5	4	4	4	2	3	4	3	3	4	3	3	3
1	18	4	4	2	4	1	2	3	2	7	5	5	4	6	4	3	6	4	5	5	3	3	2	4	3	2	3	5	4	4	4	5	4	4	3	5	4	1	2	1	1	1	3	3	3	3	3	3	2
2	18	4	5	7	7	6	5	6	6	5	4	7	5	6	7	4	6	1	1	3	1	3	1	2	2	1	3	2	1	2	2	1	1	3	2	3	3	4	3	3	4	3	4	4	3	4	3	3	4
1	20	3	3	5	4	1	4	3	2	3	3	5	5	2	4	1	4	2	4	2	2	3	3	3	4	3	3	2	3	3	4	1	3	2	3	5	5	3	3	3	2	3	3	3	2	2	3	3	2
1	18	6	6	7	4	4	4	6	4	4	5	6	6	7	6	6	6	3	4	4	4	3	2	2	2	3	3	5	5	4	5	3	4	2	3	3	2	2	1	3	3	1	1	2	1	2	2	1	4
1	18	7	5	6	5	5	6	4	5	5	6	5	4	6	6	5	6	2	3	3	3	2	3	2	4	3	4	1	3	2	3	4	4	3	5	4	3	2	2	1	3	2	1	2	2	2	2	2	1
1	19	6	5	4	5	1	1	2	2	2	4	3	2	2	3	2	2	4	5	3	3	5	5	4	5	4	5	4	3	3	4	3	3	3	4	5	5	4	3	3	3	3	2	2	2	3	2	3	4
1	19	7	6	7	4	6	6	7	7	7	6	5	7	5	6	6	7	4	3	3	5	4	1	1	1	2	3	1	2	2	3	2	3	2	2	2	2	3	2	2	3	2	1	1	1	1	2	1	4
2	19	5	7	6	7	6	4	7	7	6	4	4	4	4	5	4	7	2	2	2	1	1	1	1	3	2	1	3	3	3	1	2	1	1	1	1	1	4	4	4	4	4	3	4	4	4	4	3	3
1	19	6	6	6	6	7	6	6	6	2	1	4	4	7	5	5	5	1	1	2	1	3	4	4	3	5	5	3	4	2	3	5	5	5	4	1	2	4	2	3	3	2	1	1	2	1	2	2	2
2	19	7	5	7	7	7	6	4	4	5	5	7	6	4	4	4	4	2	1	2	2	3	1	3	3	2	1	2	2	2	2	1	3	2	2	2	3	4	4	4	3	3	3	4	3	3	3	4	4
1	19	4	4	3	3	7	6	4	4	5	5	3	5	5	4	5	4	1	1	2	3	3	5	5	5	5	4	1	3	2	2	4	5	4	4	3	2	2	2	2	3	3	1	1	2	2	1	1	2
1	24	5	5	4	5	1	1	4	3	1	4	1	3	3	4	3	5	4	3	4	5	3	3	3	2	3	2	2	3	3	3	1	2	3	2	5	5	2	1	2	2	2	3	3	3	2	3	3	3
2	20	5	6	5	4	6	7	7	5	5	6	5	4	4	5	7	7	3	2	3	1	1	3	3	1	1	1	2	2	2	1	2	2	2	1	1	2	4	3	3	4	3	3	3	4	3	4	3	4
2	19	5	5	3	3	1	2	1	2	5	3	4	6	1	3	1	1	1	1	1	3	2	3	3	4	4	2	1	3	2	1	3	4	4	4	3	4	1	2	1	1	1	3	3	2	2	3	3	3
2	23	3	2	3	4	3	5	2	4	1	1	2	2	5	4	4	6	4	5	3	4	4	3	2	2	4	4	4	5	3	3	2	2	4	3	4	3	2	1	2	2	2	3	3	2	3	3	2	2
1	21	4	2	2	4	5	3	4	4	5	3	3	6	4	4	3	4	3	4	3	4	4	1	3	1	3	3	4	4	5	4	3	3	3	2	1	1	3	2	2	3	3	2	3	2	1	2	2	1
1	22	5	7	5	7	7	6	7	6	7	5	6	7	4	6	7	5	1	2	3	2	3	2	2	2	1	1	1	1	3	2	3	1	1	3	1	2	3	4	3	3	3	4	4	4	3	4	3	4
1	22	1	2	2	1	7	4	4	5	1	3	4	3	7	5	5	7	4	3	5	4	3	2	3	2	2	2	1	1	3	3	1	3	3	2	3	3	3	3	2	2	3	4	3	4	4	2	3	4
2	24	5	5	4	6	5	4	6	3	2	1	1	1	1	1	4	1	4	3	3	4	5	4	3	3	4	5	5	3	3	4	4	4	4	4	3	4	2	3	2	2	2	1	1	1	1	1	1	3
1	26	6	7	6	4	5	4	4	5	7	4	6	4	5	4	4	6	2	1	1	1	2	1	2	3	2	1	3	1	1	1	2	3	2	2	2	3	4	3	3	3	4	3	4	3	4	4	3	4
2	24	5	7	5	6	5	6	4	5	5	4	7	7	7	5	7	4	1	2	3	1	1	1	1	3	3	3	2	3	2	3	1	3	3	1	1	3	4	3	4	4	3	3	4	4	4	3	3	4
1	25	2	1	3	4	3	2	5	2	7	4	6	6	2	4	2	4	3	3	4	4	4	2	3	3	3	3	5	4	5	5	3	4	4	4	1	3	2	2	1	2	2	3	3	2	2	2	3	3
1	26	5	6	4	5	5	4	6	5	7	4	6	6	4	7	4	4	2	1	1	3	2	2	2	2	1	1	1	1	3	2	2	2	3	1	1	2	3	4	3	4	3	4	4	3	4	4	3	3
1	21	3	3	5	2	4	5	3	4	1	2	1	4	5	3	3	5	4	3	3	4	5	2	2	2	2	2	5	5	3	5	1	2	2	3	1	3	2	2	2	1	2	3	2	3	3	2	2	1
1	24	4	5	4	3	4	5	3	5	3	4	3	2	3	3	4	5	5	5	5	3	4	4	4	3	4	3	2	3	3	2	3	4	3	4	4	4	4	3	3	3	3	3	2	3	2	2	2	1
1	20	2	2	4	4	4	4	3	5	5	3	6	5	5	6	3	4	2	3	2	4	2	3	4	4	3	4	2	3	3	3	1	3	1	3	2	4	4	4	3	2	3	1	1	1	1	2	1	2
1	23	2	1	2	1	2	4	2	3	2	2	3	2	1	1	1	2	1	3	1	3	2	2	3	4	4	3	5	4	4	5	5	5	4	5	4	4	4	4	2	3	4	2	2	2	3	3	1	4
2	20	5	5	4	6	2	4	3	2	3	5	3	4	3	3	5	5	3	3	2	4	3	2	4	2	3	3	3	2	2	2	1	3	2	2	2	4	1	1	2	2	2	2	2	2	3	2	1	4
1	23	4	7	4	4	6	6	5	7	6	7	4	7	7	4	6	4	2	2	1	1	3	3	3	3	1	3	1	2	1	3	1	3	2	2	3	3	4	4	3	3	3	3	3	4	4	4	4	3
1	25	7	6	4	6	4	2	5	4	7	6	4	4	5	6	5	5	3	2	4	2	3	3	3	2	2	2	2	4	4	3	3	4	3	4	1	2	4	2	3	3	3	3	2	3	2	2	2	4
2	22	2	2	3	2	3	2	5	5	1	2	3	4	6	4	5	6	1	2	2	3	3	5	4	4	4	5	4	3	4	3	5	5	3	4	4	5	4	2	4	2	3	3	2	3	3	2	2	4
1	22	2	4	3	4	4	4	4	4	4	5	4	4	2	3	3	4	1	3	1	3	2	1	2	1	1	1	2	1	1	3	3	2	1	1	1	1	1	1	1	1	1	1	2	2	2	1	2	1
1	20	2	3	2	3	3	5	3	4	1	3	2	2	1	1	1	1	5	5	3	5	5	3	4	3	4	4	2	3	3	3	2	2	3	2	2	3	1	2	2	2	1	2	2	3	2	1	1	1
2	20	6	4	7	5	7	6	4	5	6	5	6	4	6	5	7	6	3	1	1	1	1	2	2	2	1	3	1	1	3	1	1	3	2	2	2	1	3	4	4	4	3	4	3	3	4	4	3	4
2	22	7	5	4	4	7	5	6	6	7	5	4	4	5	5	5	5	3	3	2	4	3	5	4	4	3	3	3	4	2	4	1	2	3	3	4	3	2	2	3	3	1	4	2	3	3	3	3	4
2	26	1	3	3	1	4	4	3	4	6	6	4	4	2	3	2	1	2	2	2	3	4	3	4	4	2	3	5	4	4	4	5	3	4	4	1	3	3	4	4	3	4	4	4	4	3	3	3	4
1	23	3	4	4	4	6	3	4	6	4	4	3	5	7	4	5	5	3	4	2	4	2	5	3	3	5	5	2	4	3	2	4	4	4	5	4	4	3	2	2	2	2	1	2	2	2	1	1	1
2	22	5	6	4	5	5	4	6	5	6	7	6	6	7	5	4	4	1	1	1	2	1	1	2	2	1	2	3	2	3	3	1	3	3	1	2	1	3	4	3	4	4	4	4	4	3	3	3	3
2	23	7	4	6	4	5	5	6	7	7	4	6	4	7	5	6	6	4	3	3	3	4	2	2	2	3	3	5	5	3	5	2	3	3	3	4	4	2	2	2	1	2	3	3	2	3	2	3	2
1	20	6	6	4	3	3	2	5	3	3	5	3	2	6	3	6	4	5	4	5	5	5	4	3	4	4	5	3	4	3	4	4	4	3	3	1	3	4	2	3	3	3	4	3	2	3	4	4	1
2	22	6	4	3	3	6	5	5	6	5	4	4	5	3	4	5	5	4	5	4	3	3	3	3	4	4	4	5	5	3	5	5	5	3	5	4	5	1	1	2	2	1	2	2	2	2	2	2	2
1	22	5	3	4	3	4	4	4	4	5	3	5	5	6	4	3	4	5	5	4	4	3	1	1	3	2	2	4	4	3	3	4	3	4	4	2	2	3	2	2	3	3	4	2	3	2	3	3	2
1	20	2	2	3	2	6	6	6	6	6	6	6	4	5	5	4	4	4	5	3	4	4	2	3	2	2	4	5	4	4	3	1	2	2	2	5	5	2	2	2	3	3	4	3	3	4	2	4	1
2	26	7	7	6	4	2	3	4	4	6	6	5	5	7	7	6	5	3	2	2	4	4	4	3	4	4	4	4	4	4	3	2	2	3	2	2	3	4	2	2	3	3	4	3	3	3	3	2	3
1	24	5	3	5	4	1	1	4	4	4	4	4	5	4	4	4	3	3	4	3	3	2	5	5	3	4	5	4	3	4	4	1	2	1	3	2	3	1	2	2	1	1	1	1	1	2	1	2	3
2	22	5	5	4	7	5	4	5	5	7	6	6	7	5	6	6	4	1	2	2	2	2	2	2	1	1	2	1	1	1	1	2	2	3	2	1	2	3	3	4	4	3	4	3	4	3	3	4	3
1	24	4	3	3	3	6	5	6	6	5	6	3	5	6	6	4	5	2	3	2	3	3	1	2	1	3	3	2	2	3	3	2	2	3	3	2	3	3	3	2	2	3	3	2	2	3	2	2	1
1	25	3	2	2	2	5	4	4	3	3	2	4	5	4	5	4	4	5	5	5	4	5	3	3	3	3	4	2	2	4	3	5	5	3	4	3	3	4	4	4	3	2	4	3	2	3	3	4	3
1	22	2	2	3	2	1	2	1	2	2	4	3	3	2	4	3	1	2	3	3	2	3	2	4	2	3	3	3	4	3	3	5	4	4	3	1	2	3	2	2	2	3	3	3	2	2	2	3	3
2	20	1	3	4	1	6	5	6	5	3	4	3	2	3	4	2	4	2	3	4	2	4	3	3	4	3	2	2	2	4	2	3	3	2	4	4	5	2	1	2	2	1	3	3	3	2	2	3	2
1	22	5	7	6	4	5	7	6	5	6	4	5	7	5	7	7	7	2	1	2	2	2	1	2	1	1	1	1	2	3	2	3	1	1	1	1	3	4	3	4	4	3	4	4	3	4	3	3	3
1	23	1	1	4	3	7	7	5	5	1	2	3	2	6	6	6	6	4	3	4	5	4	5	5	5	4	4	1	3	2	2	3	2	2	3	1	1	4	2	2	3	2	2	1	2	2	1	2	4
1	22	6	6	5	5	7	7	4	5	7	4	6	7	7	6	7	5	2	2	3	1	3	2	1	3	3	2	1	2	3	3	2	1	2	3	1	1	3	4	4	3	3	4	3	3	3	4	4	4
2	20	7	4	7	4	3	3	2	4	5	6	4	6	3	2	4	3	4	3	5	4	5	3	3	3	4	2	3	3	2	4	5	5	5	4	5	4	3	3	2	2	3	4	2	3	3	2	3	4
1	21	3	3	2	4	2	2	4	4	4	4	2	3	4	4	3	2	3	3	4	3	2	5	4	3	3	4	5	5	5	4	2	2	3	4	1	3	4	4	3	2	3	4	2	4	3	3	2	2
1	22	1	2	3	2	6	6	6	6	6	6	5	5	1	3	2	4	2	2	3	4	2	5	5	5	5	3	3	4	3	3	5	3	5	4	3	3	1	1	2	2	2	2	1	2	2	3	1	3
1	23	3	5	4	4	4	5	3	4	2	4	2	3	2	4	3	3	2	3	2	4	3	2	2	3	3	4	2	2	2	3	2	2	2	3	5	3	3	2	2	2	3	4	2	2	2	4	3	4
1	22	5	5	5	6	5	5	6	6	7	6	6	6	5	6	4	7	2	3	2	3	2	2	3	2	3	3	2	3	1	2	3	1	3	3	3	2	4	3	4	3	3	3	3	4	3	4	4	3
1	21	7	7	7	4	7	6	6	6	6	4	4	4	3	4	3	4	5	3	3	4	5	2	2	3	2	3	2	4	2	2	3	2	3	4	1	1	4	3	3	4	3	2	2	2	3	3	1	4
1	20	5	4	5	6	7	7	6	7	7	5	6	7	4	7	7	7	1	3	3	2	2	3	2	3	1	3	2	1	2	1	2	1	1	3	1	3	3	4	4	3	3	3	4	4	4	3	3	3
1	22	3	4	4	3	2	4	2	3	4	5	2	3	1	3	1	1	4	3	4	3	3	3	2	4	3	2	5	4	5	3	4	3	4	5	1	3	1	2	1	2	1	3	3	3	3	2	3	1
1	24	5	5	5	5	4	2	5	4	4	5	2	4	1	1	2	2	2	3	2	4	4	2	3	3	3	2	3	4	4	4	2	3	3	3	2	2	2	1	2	2	2	1	1	2	1	2	2	3
1	21	2	4	4	4	1	3	3	2	2	3	3	4	6	4	4	6	2	1	1	2	2	3	3	3	1	3	2	2	1	2	2	2	2	1	1	2	3	2	3	2	2	4	3	3	3	2	2	3
1	24	1	3	3	1	2	3	3	4	2	3	4	4	7	5	6	5	1	2	3	2	2	3	4	4	4	4	2	4	2	2	1	2	1	3	3	4	1	1	1	2	2	3	3	3	2	3	3	1
2	20	4	3	4	4	3	4	3	3	5	3	6	3	6	4	6	4	3	4	3	3	3	2	3	2	3	4	1	3	3	2	1	3	1	3	3	4	1	1	2	1	1	2	2	1	1	3	2	2
1	20	2	4	2	2	3	4	3	4	1	4	2	3	1	2	3	2	4	4	4	3	5	1	3	2	2	2	4	4	3	3	2	3	4	2	4	3	4	3	4	3	4	4	3	3	3	3	4	4
2	24	6	6	7	6	5	7	6	6	5	5	5	7	7	5	6	7	2	1	1	3	3	1	1	3	2	2	2	2	1	3	1	3	2	2	2	2	3	4	3	3	4	4	4	3	4	4	3	3
2	23	4	4	4	5	1	4	1	3	3	5	5	3	3	2	4	3	5	5	3	4	5	2	3	3	4	3	2	3	2	3	5	5	5	3	4	4	3	2	2	2	2	1	1	1	1	2	2	2
1	21	7	7	7	7	6	5	6	4	5	5	5	6	6	4	5	7	2	2	3	1	1	1	2	1	2	2	1	3	3	1	1	2	3	2	1	2	3	4	4	3	3	3	3	3	3	4	3	3
2	20	5	4	3	6	5	3	4	5	5	3	4	4	3	4	2	4	3	3	3	3	3	5	3	5	4	4	1	3	3	2	1	2	2	3	4	4	1	1	1	1	1	2	3	3	2	2	2	4
2	22	6	5	7	4	6	6	4	7	7	5	6	6	5	4	4	6	1	3	2	2	3	5	4	5	5	4	1	3	3	2	1	3	2	3	5	5	1	2	1	2	2	4	2	3	3	2	2	2
1	24	3	5	5	3	6	4	5	5	2	4	1	4	3	3	5	5	2	2	2	3	4	2	2	3	2	2	3	3	3	2	3	3	3	4	3	4	1	2	2	1	2	2	1	3	1	3	1	3
1	26	6	3	4	4	4	4	4	4	2	2	1	2	2	4	4	3	1	3	1	3	2	3	3	1	1	2	2	2	2	1	1	3	1	1	1	1	3	3	2	3	3	2	3	1	2	2	2	2
1	19	7	7	6	6	5	7	5	7	6	7	6	6	6	6	4	6	2	3	1	3	2	1	3	1	3	3	2	3	3	1	1	3	1	3	1	3	3	3	3	3	3	4	3	3	4	4	4	4
2	19	7	4	5	7	4	4	4	5	5	4	6	3	2	4	3	1	5	4	3	4	5	1	3	2	3	3	2	4	3	4	5	4	3	5	3	4	4	4	2	3	2	4	3	4	3	4	3	2
1	24	5	3	4	4	5	5	5	4	4	3	4	3	2	2	2	2	4	3	4	4	3	5	5	3	5	4	1	2	3	3	5	4	3	4	5	3	1	2	2	1	2	3	2	3	2	2	3	3
1	25	4	4	3	3	6	5	4	5	3	4	3	3	4	3	5	5	5	4	5	5	5	5	5	3	4	4	4	5	3	4	3	2	4	4	5	3	3	3	2	2	3	3	2	3	3	3	3	1
2	21	6	4	6	6	7	6	4	6	6	4	5	4	6	4	6	7	1	3	1	2	1	2	3	1	2	3	1	1	1	3	3	1	3	1	1	1	4	4	4	4	4	3	3	4	4	4	3	3
1	23	6	5	5	5	3	2	3	2	7	6	4	5	1	2	1	3	5	4	4	4	4	4	4	4	3	4	5	4	3	3	3	3	3	4	5	4	2	1	2	3	3	3	2	3	2	2	3	3
2	24	6	3	6	4	5	5	4	4	4	5	4	5	3	4	2	4	3	2	3	2	3	5	4	3	4	4	5	5	4	4	5	3	5	5	2	2	1	1	2	1	2	3	3	2	2	3	3	3
1	23	4	3	4	5	3	2	3	3	5	4	5	4	5	3	5	3	2	2	3	3	3	3	1	2	2	1	3	1	1	3	3	3	3	2	2	1	3	3	3	2	2	1	2	2	2	2	1	1
1	22	3	4	3	3	2	1	1	4	5	4	4	6	3	2	5	2	4	3	4	4	4	3	4	4	4	2	3	2	2	4	2	3	4	4	2	2	1	1	2	2	1	3	2	3	2	2	2	4
1	25	4	4	7	4	5	6	6	6	5	4	4	6	6	5	7	4	1	2	2	3	2	2	1	2	1	1	2	3	2	3	1	2	1	3	1	1	3	3	3	4	3	4	3	3	3	4	4	3
2	20	1	2	2	2	5	3	5	5	2	4	3	4	7	4	6	6	1	2	2	2	3	1	2	2	2	3	3	3	4	3	4	5	4	3	1	2	3	2	3	3	3	3	3	2	2	2	3	3
2	22	2	2	3	4	4	3	5	5	5	3	5	5	3	5	4	5	2	3	2	3	2	2	3	2	3	2	5	5	5	4	3	3	4	3	2	3	3	2	3	2	2	2	2	2	1	2	1	2
2	21	6	5	4	4	1	2	1	3	5	3	4	5	2	3	2	2	3	4	4	2	3	5	5	4	5	4	3	3	2	3	4	4	3	4	3	4	3	2	2	3	2	2	2	2	1	2	2	3
1	22	1	4	1	1	2	2	1	3	5	4	4	5	5	4	4	4	3	2	3	3	3	5	5	5	4	4	5	5	4	5	2	4	3	2	2	3	2	1	2	2	3	1	2	2	1	1	2	2
1	22	6	6	5	4	7	5	4	4	7	7	7	6	6	6	4	5	1	2	2	3	1	1	3	3	1	1	2	2	2	1	1	3	2	1	1	3	4	3	3	3	3	4	3	3	3	3	4	3
1	26	7	4	4	5	2	4	3	1	7	5	4	5	2	4	4	3	5	5	4	3	5	4	4	5	4	5	5	5	4	4	5	3	3	4	2	2	4	3	3	3	3	2	2	2	2	1	3	4
1	25	2	2	2	2	3	2	3	3	5	5	4	4	1	4	1	1	2	4	2	3	4	3	4	4	4	3	1	2	3	2	3	4	4	4	2	2	3	3	4	3	3	3	3	4	3	4	4	4
2	23	7	7	4	6	2	2	4	2	6	3	6	3	5	5	4	6	2	2	2	3	3	3	3	3	2	3	5	4	4	5	5	4	4	4	4	4	1	2	2	1	2	4	4	3	2	2	3	2
1	25	5	5	3	6	2	3	2	2	6	6	6	3	6	6	5	5	2	4	2	2	3	4	3	5	4	4	5	4	4	5	5	4	4	5	3	4	2	2	2	1	1	3	3	3	2	3	3	2
2	26	6	6	4	5	6	6	4	6	3	3	2	4	7	7	6	6	2	4	2	3	3	3	2	2	4	4	4	3	3	3	4	4	4	4	3	2	1	2	2	1	2	2	2	2	2	2	2	4
2	22	1	4	4	3	5	6	3	4	1	4	1	3	5	3	6	3	2	3	2	2	3	1	3	3	3	2	4	3	3	4	4	3	3	3	4	4	4	4	4	3	3	4	3	4	3	4	4	3
2	22	7	6	5	4	4	5	5	4	5	5	4	3	5	5	4	4	5	4	4	4	4	1	2	2	2	3	2	3	3	2	3	3	3	2	5	5	1	2	2	2	2	4	2	2	4	2	3	2
2	22	5	4	3	6	5	3	4	5	6	6	3	6	1	2	2	3	5	4	5	5	5	3	4	3	2	4	3	3	2	4	5	5	5	4	5	4	4	3	4	4	2	2	2	2	2	2	1	4
1	26	5	4	5	7	6	5	6	7	4	4	7	5	5	6	7	7	3	1	1	1	3	2	2	1	1	1	2	2	3	2	1	1	3	1	2	3	4	3	4	4	3	3	4	3	4	4	3	4
2	22	5	3	3	5	2	4	1	3	6	3	5	4	5	6	3	5	4	4	4	4	4	2	2	3	3	3	3	4	3	2	3	4	4	4	5	5	3	2	2	2	2	1	1	1	2	2	2	1
1	24	4	3	4	5	1	1	3	4	3	3	4	2	6	6	5	3	3	3	2	4	3	1	3	1	1	2	4	3	3	5	1	1	1	2	4	4	3	2	2	2	2	2	2	2	3	2	3	2
2	20	6	5	4	4	3	2	4	2	5	6	6	5	4	2	3	3	4	4	3	4	3	3	4	3	4	3	1	3	3	3	4	4	3	3	5	3	4	4	3	4	3	3	4	4	3	4	3	3
1	22	5	5	7	6	6	7	7	4	7	5	4	4	7	6	5	7	2	2	3	3	2	4	3	5	5	3	3	4	3	4	4	4	4	3	4	5	4	4	3	4	4	3	3	3	3	3	3	3
2	22	4	3	4	3	7	4	5	6	3	3	4	2	1	2	1	1	2	2	2	3	4	1	1	2	2	2	2	3	3	2	1	3	2	2	2	3	3	3	3	2	2	4	4	3	2	2	4	1
1	20	6	6	5	5	5	4	7	5	5	5	4	6	6	5	5	5	2	3	2	2	1	1	1	3	1	3	3	1	1	1	1	3	3	3	2	1	4	3	3	3	4	3	4	3	3	3	3	4
2	22	7	4	4	6	3	3	2	2	2	2	3	4	5	3	3	5	2	3	3	3	4	4	3	3	5	4	3	4	4	4	1	1	3	2	4	3	2	2	2	3	2	1	2	2	2	1	1	4
2	22	6	4	5	4	6	6	6	5	1	3	1	1	1	3	1	3	1	3	2	2	3	3	3	3	2	2	1	3	1	2	3	4	4	3	4	3	2	1	3	2	1	2	2	1	2	2	2	3
1	21	5	5	6	6	5	7	6	6	5	7	6	5	4	6	5	6	1	1	2	1	2	2	2	1	2	1	2	2	1	1	1	1	3	2	1	3	3	3	4	3	3	3	4	3	3	3	4	4
1	22	2	1	4	4	7	7	6	4	6	4	4	4	7	5	6	6	5	4	5	4	3	1	1	1	3	2	2	4	2	3	2	3	2	2	3	2	3	3	3	3	2	3	2	2	2	3	2	3
2	22	3	4	2	4	6	5	6	3	7	5	4	4	4	2	4	3	3	2	4	3	3	1	3	2	3	3	3	4	4	3	4	5	3	4	4	5	4	4	4	3	4	3	3	3	3	4	4	4
1	20	6	3	5	6	7	4	4	4	7	4	4	6	6	6	3	4	2	4	2	2	2	2	4	3	2	3	5	4	5	5	3	4	4	4	3	3	2	2	2	2	3	3	2	2	3	3	2	3
1	20	5	4	6	5	2	3	3	4	5	6	3	5	3	2	2	2	1	3	3	2	2	2	4	4	4	3	4	3	4	5	5	3	4	3	2	2	3	2	3	2	2	1	2	1	1	2	1	1
2	26	5	4	6	4	4	4	3	3	7	7	6	6	3	4	5	2	1	1	3	2	2	3	2	4	4	2	3	2	3	4	5	5	4	3	2	3	4	3	4	4	4	3	3	3	4	3	3	4
2	22	5	6	5	7	7	5	6	5	5	7	4	7	5	7	5	7	3	2	2	3	2	2	3	2	3	2	3	3	3	4	3	4	4	4	4	4	2	2	3	2	1	4	4	3	2	3	3	1
2	25	5	7	5	5	5	4	4	7	7	4	4	4	7	7	7	4	2	2	1	2	1	1	3	1	1	1	1	1	1	1	2	1	2	3	3	2	3	3	4	4	3	4	4	3	3	4	4	3
2	21	1	1	3	3	2	3	3	3	4	4	3	4	5	6	5	4	1	3	3	2	1	2	3	3	3	4	4	3	3	3	2	2	2	4	3	2	4	3	3	4	4	4	3	3	4	4	4	3
2	20	6	7	6	5	7	7	6	6	4	5	4	6	6	6	6	4	2	2	3	2	4	4	4	3	3	3	1	2	3	2	5	3	4	5	3	3	4	3	4	4	4	3	3	3	2	2	3	2
1	19	6	4	7	7	5	5	7	6	5	6	6	6	7	6	6	6	4	3	4	5	4	2	3	4	3	2	2	2	3	2	3	2	3	3	4	4	2	1	3	3	2	3	2	3	2	2	3	2
1	22	5	3	3	6	5	5	4	4	4	5	3	2	4	4	5	2	2	3	2	3	3	1	3	2	3	3	3	4	3	4	2	4	4	3	4	5	1	2	2	1	2	3	3	3	3	3	2	3
1	27	6	5	5	3	5	5	5	4	6	6	4	4	1	3	2	2	3	4	4	2	3	5	4	5	3	5	2	2	2	3	2	2	4	4	1	2	4	3	2	4	3	4	3	3	4	4	3	2
1	20	6	7	5	4	5	5	6	6	7	6	5	5	5	5	6	5	4	3	3	3	3	3	3	4	4	4	1	3	1	2	1	3	2	3	2	2	3	3	2	2	3	1	1	1	2	1	1	3
1	24	5	6	5	5	6	6	6	6	7	7	6	6	6	5	7	5	1	2	2	2	2	5	4	4	3	4	4	3	4	4	3	4	3	3	3	4	3	3	3	2	2	4	2	2	3	3	4	3
2	20	5	4	5	6	2	3	4	4	1	2	1	4	6	6	6	6	3	4	4	4	2	4	3	3	4	5	2	2	3	2	1	3	3	3	1	3	2	1	1	2	2	4	3	2	2	3	3	1
1	23	6	4	6	5	1	3	4	1	7	6	4	5	3	3	4	3	2	2	1	1	1	3	1	2	3	3	3	3	2	3	2	1	2	3	3	1	4	3	3	4	3	2	1	2	2	1	2	4
1	22	1	2	2	1	4	5	2	2	2	4	1	3	2	4	1	1	1	1	3	1	3	1	3	3	2	3	4	5	5	3	4	5	4	5	2	2	3	3	3	3	3	3	4	3	3	3	3	3
2	23	1	3	2	4	7	4	6	6	2	1	3	3	6	4	6	4	2	2	3	4	3	2	2	3	3	4	5	4	5	4	3	3	4	4	4	5	3	2	3	3	2	3	2	2	2	2	3	2
2	22	5	5	7	5	5	6	6	5	5	7	4	4	4	7	6	7	2	1	2	2	1	1	1	1	3	1	2	2	3	3	2	1	1	3	1	3	4	3	4	4	4	3	3	4	4	3	4	3
2	24	6	3	6	6	4	4	5	5	7	6	4	6	6	6	5	5	2	1	2	1	2	1	3	2	1	2	2	2	2	2	2	2	1	1	1	3	3	3	3	3	3	3	2	2	2	2	2	2
1	18	7	6	6	6	7	4	4	4	5	4	7	6	6	4	7	4	1	1	3	3	1	2	2	1	1	2	2	1	1	2	1	1	1	1	1	1	3	4	4	3	4	4	4	4	4	3	3	3
1	20	7	6	4	7	1	4	1	2	2	3	4	2	5	6	6	6	4	5	4	4	4	3	4	3	4	3	1	2	3	2	5	4	5	4	4	3	2	2	1	3	2	3	2	3	2	3	2	2
1	21	7	5	4	4	1	3	1	2	5	3	3	3	5	5	5	4	4	3	4	5	3	4	3	5	4	3	1	3	3	2	1	3	1	3	5	3	3	3	4	4	4	3	4	3	3	3	3	4
2	24	3	5	5	5	1	2	2	3	4	3	5	3	7	5	4	4	1	3	3	3	2	2	3	3	3	2	2	3	2	3	1	3	2	2	1	3	1	1	1	1	2	4	2	2	2	2	3	1
1	23	7	6	6	7	6	5	5	5	4	2	2	4	5	4	4	6	5	3	5	4	4	1	2	3	1	2	4	4	5	3	3	3	4	3	2	3	2	1	2	2	3	4	3	4	2	3	4	2
1	24	6	7	4	5	7	6	4	6	7	7	4	5	5	5	5	6	2	2	3	3	2	4	4	4	3	5	2	3	3	2	1	1	3	3	5	5	2	2	2	3	1	2	2	1	2	2	3	2
1	23	7	5	6	6	4	4	2	4	4	2	3	2	4	5	4	4	3	2	4	2	2	1	2	3	3	1	4	3	3	4	5	5	4	5	3	3	2	2	2	1	3	1	1	1	2	2	1	4
1	19	4	7	5	5	7	5	4	4	5	5	5	7	6	4	5	4	1	3	3	3	1	2	2	1	2	2	1	2	3	1	1	2	1	1	3	1	4	3	3	3	3	4	3	4	3	3	4	3
2	24	2	2	4	2	6	4	4	3	6	6	3	4	6	6	4	4	1	1	3	1	2	2	2	2	2	3	1	1	3	2	1	2	3	2	1	1	1	2	2	2	1	3	3	2	3	3	3	4
2	21	3	3	4	3	5	5	4	3	3	4	3	3	5	5	6	5	1	3	1	3	2	2	3	3	3	2	2	1	2	1	1	3	1	2	1	2	1	1	1	1	1	3	3	3	2	2	2	4
2	20	4	5	2	4	5	5	3	6	1	3	4	3	1	3	4	1	4	3	3	3	4	5	4	5	5	4	1	2	2	3	2	3	4	3	4	3	3	2	2	3	2	4	2	4	4	4	2	2
1	23	6	4	6	6	7	4	5	6	5	5	6	5	6	6	6	6	1	2	3	1	1	2	2	1	1	2	3	1	2	3	2	2	3	2	2	2	4	4	2	3	3	1	1	1	1	2	1	3
2	20	5	3	4	6	6	3	3	4	2	1	3	3	7	5	4	5	1	2	3	3	3	5	5	3	5	5	2	3	4	2	4	4	3	4	1	3	4	3	3	2	2	2	2	2	3	3	2	2
2	23	5	5	5	4	2	4	4	3	7	6	6	6	3	2	2	5	2	2	3	4	2	3	2	4	4	4	5	3	5	5	2	3	3	3	2	2	3	3	2	3	3	4	3	2	2	2	3	3
1	25	2	3	2	2	7	5	6	5	4	3	2	4	6	6	4	5	1	3	3	3	1	2	3	3	2	1	1	3	1	3	2	2	3	2	3	3	2	1	2	2	1	1	1	1	2	2	2	4
1	22	6	4	6	6	6	6	5	5	2	3	2	3	2	1	2	1	1	3	1	3	2	1	2	3	3	1	4	4	3	4	5	3	4	5	4	4	3	2	3	3	3	4	2	2	2	3	2	4
1	22	1	1	1	2	3	2	5	5	6	5	5	3	1	4	3	1	3	4	3	3	4	3	3	3	4	4	5	5	4	5	1	2	2	3	2	2	2	1	1	1	2	1	2	2	1	2	1	2
1	22	5	3	6	4	2	3	3	3	7	4	4	4	1	4	3	3	1	3	3	2	2	2	2	2	2	2	2	2	2	1	2	2	2	1	1	1	2	3	1	1	2	3	3	2	3	2	2	1
1	22	7	4	7	5	6	4	5	4	4	3	2	2	5	3	5	3	3	2	4	3	4	1	3	2	1	2	5	3	5	4	3	2	2	4	3	3	2	2	2	3	3	3	2	2	2	2	2	3
1	20	7	7	7	5	7	7	5	5	5	7	5	5	4	4	4	5	4	3	3	4	3	2	2	3	2	4	1	3	1	3	4	3	3	4	3	2	2	1	3	2	3	3	3	2	2	3	2	4
1	23	7	5	5	5	4	4	4	4	6	6	4	5	6	4	6	7	2	3	1	3	3	1	3	1	1	1	3	3	1	2	2	2	2	1	1	3	3	3	3	3	3	4	4	4	3	4	3	3
1	23	6	5	5	4	2	4	4	1	3	3	3	4	7	5	6	5	2	3	2	3	2	3	1	1	3	3	2	1	3	3	3	3	1	3	2	2	2	2	3	2	3	1	1	1	1	2	1	1
1	26	3	5	5	3	5	3	3	5	5	4	5	3	2	4	3	3	3	4	2	3	2	5	3	4	5	4	5	3	3	5	4	5	4	5	4	4	4	3	2	4	4	1	2	1	2	2	2	2
1	27	2	1	1	4	4	2	2	2	2	3	2	3	3	2	3	3	2	4	4	2	4	4	4	4	4	5	4	4	3	3	2	2	3	3	2	2	3	3	3	3	2	2	3	3	2	2	2	1
1	22	5	3	4	6	4	5	4	2	5	4	4	5	7	5	4	6	4	4	3	3	3	4	3	4	5	4	4	5	4	4	3	3	4	4	3	4	3	3	3	2	3	1	1	1	2	2	1	4
1	18	3	2	4	2	1	2	1	1	6	4	3	3	4	5	3	3	1	2	3	1	2	4	4	4	5	3	1	3	1	3	4	5	4	5	3	2	3	2	2	3	3	2	3	3	2	2	2	4
1	23	2	1	2	1	1	4	1	2	6	3	6	3	6	4	3	4	5	3	5	3	4	4	3	4	3	3	3	3	3	4	1	3	2	2	3	4	4	4	3	4	4	3	4	3	3	4	4	4
1	21	7	7	4	4	5	7	5	7	6	6	4	5	4	5	5	4	1	1	2	2	3	1	1	1	3	3	1	1	2	3	2	2	2	1	3	1	3	4	4	4	4	4	4	3	3	4	4	3
1	24	7	5	4	6	5	7	6	6	5	6	5	7	5	6	7	7	1	1	3	2	1	3	3	3	3	3	1	2	1	2	2	2	1	1	2	2	4	4	3	3	3	3	3	4	3	4	4	4
1	24	1	2	1	4	3	4	3	4	6	4	6	3	2	4	3	2	3	3	2	4	3	3	3	2	4	4	4	4	3	4	3	3	4	4	4	4	4	3	3	4	4	3	3	3	3	3	4	4
1	22	6	7	5	5	5	7	5	5	7	5	4	6	7	6	5	4	1	3	2	1	2	2	3	3	2	3	2	4	4	3	3	4	4	4	4	5	4	2	2	3	2	4	3	3	4	4	4	2
1	23	5	4	3	4	5	5	4	4	2	2	2	4	5	3	4	5	4	3	3	5	3	2	3	2	2	3	3	4	3	3	4	4	4	4	2	3	2	1	3	2	2	3	3	2	3	2	3	4
1	24	5	3	4	3	7	6	7	6	2	2	3	2	6	3	5	5	5	5	5	4	3	4	4	3	3	3	1	3	3	2	5	3	4	4	5	3	4	3	4	4	3	2	2	3	3	2	2	2
1	22	4	4	5	5	1	4	1	2	6	3	6	5	1	1	2	2	3	4	3	3	3	5	3	5	4	4	1	2	1	2	2	2	3	3	4	5	1	2	1	1	2	1	2	2	1	2	2	1
2	22	3	2	3	5	1	1	1	2	1	3	2	1	6	3	4	3	4	3	5	5	3	4	4	4	3	5	5	5	5	4	5	4	3	4	3	4	1	1	1	1	2	2	3	1	3	3	1	4
2	22	1	3	4	2	1	2	4	2	2	3	2	1	5	4	5	3	5	5	5	4	4	5	4	5	4	3	5	5	4	4	5	5	3	4	2	3	3	3	3	2	2	2	2	2	2	2	2	3
2	22	5	6	4	5	2	3	3	4	7	6	4	6	4	3	5	4	1	3	2	2	2	5	3	4	5	4	4	4	3	4	1	3	3	2	2	3	2	1	1	3	2	3	3	2	3	2	3	2
2	24	5	5	6	5	5	4	7	4	5	7	4	4	4	7	4	4	2	3	3	2	2	2	1	3	2	2	2	2	2	2	1	2	2	1	1	1	4	4	4	4	4	3	3	4	3	3	3	4
2	22	1	2	1	4	2	1	4	4	5	5	4	6	5	3	5	5	2	1	2	2	1	1	2	3	3	3	1	3	2	1	2	2	1	2	2	2	2	2	2	2	2	2	2	3	3	2	2	4
2	19	7	5	6	6	3	3	4	5	5	5	4	6	6	5	3	5	1	3	1	1	2	3	3	3	3	3	1	3	1	1	2	1	2	2	3	1	2	1	2	2	2	4	3	2	2	4	2	3
2	26	3	5	3	3	3	5	2	3	3	4	2	3	1	4	2	3	3	4	2	3	3	5	5	5	3	4	1	3	3	1	1	2	3	3	3	3	3	3	2	3	2	4	4	3	3	3	3	1
2	23	6	6	3	4	7	5	6	5	7	5	6	6	7	7	6	5	1	3	1	2	2	5	5	5	5	4	3	4	3	2	1	3	3	2	4	4	3	2	3	2	2	2	3	2	2	2	1	3
1	22	2	2	4	2	4	2	4	3	4	5	3	2	2	3	2	4	1	1	2	3	3	3	3	4	4	3	4	3	3	4	3	2	3	2	3	2	3	2	3	2	3	4	2	3	3	4	3	2
2	22	5	3	4	3	6	6	6	5	4	3	4	4	6	4	6	6	2	3	2	2	4	3	3	3	4	4	1	3	3	1	5	5	5	5	5	5	1	1	2	2	1	1	2	2	2	1	2	1
1	21	2	4	3	4	2	4	4	2	2	2	3	4	4	4	4	4	5	5	5	5	4	5	4	4	5	5	3	2	3	4	5	4	4	5	2	2	1	2	2	1	2	3	2	3	3	3	3	3
1	25	7	4	5	5	3	5	2	3	1	2	1	4	7	4	7	6	5	4	5	5	4	2	4	2	4	2	3	3	4	2	2	3	3	3	4	5	1	1	2	2	2	3	3	3	2	3	3	3
1	23	1	1	1	2	7	6	4	5	1	3	3	1	6	4	5	6	2	2	3	4	3	5	4	4	3	3	5	3	3	4	2	4	4	4	4	4	2	1	1	1	3	2	1	1	1	1	3	2
2	21	5	5	3	5	7	5	6	4	5	5	3	5	4	5	4	2	5	4	3	3	5	1	3	3	3	3	2	3	2	3	1	2	2	2	2	3	2	1	2	3	2	2	2	2	3	1	1	4
2	22	6	6	5	3	4	4	2	4	2	4	2	2	2	2	3	3	3	4	4	3	4	3	3	3	3	3	2	2	3	3	1	3	2	3	3	3	3	3	3	2	2	3	3	2	3	3	2	4
1	22	6	3	6	5	2	1	4	3	3	2	2	3	3	2	2	2	5	4	5	4	5	4	4	5	3	3	2	3	2	4	2	3	2	3	2	3	1	2	2	1	2	2	2	3	2	2	2	2
2	20	5	6	5	5	6	5	4	4	7	4	7	6	4	4	2	4	2	3	4	3	4	4	3	5	3	3	2	3	2	4	1	2	3	2	1	2	2	1	3	2	2	4	2	4	3	3	2	2
1	21	6	4	4	4	2	2	2	2	2	2	4	3	7	4	6	6	3	3	2	4	3	4	4	4	4	3	5	5	4	5	2	2	3	3	3	4	1	2	1	2	2	4	3	3	3	3	2	1
2	21	7	6	4	4	4	4	3	4	4	4	4	4	5	3	4	5	1	3	1	3	2	3	3	4	2	4	4	4	3	3	4	4	5	4	5	5	1	1	2	2	1	2	1	3	2	1	2	1
1	22	4	2	3	2	4	5	3	5	5	3	4	3	6	4	3	3	1	2	2	2	1	2	3	3	2	2	3	4	4	4	2	3	2	4	1	3	4	3	3	3	3	2	1	1	3	2	2	4
1	22	7	6	7	6	5	6	7	5	6	7	4	7	7	6	6	6	2	2	2	3	4	2	2	4	3	2	4	5	3	5	2	4	3	2	3	2	2	2	2	2	2	3	2	3	2	3	2	4
1	20	3	4	4	3	4	3	3	2	7	4	4	4	6	6	3	4	3	4	4	3	2	4	5	4	4	4	2	3	2	2	1	3	1	2	2	2	3	2	2	2	3	1	2	2	1	1	2	4
1	24	3	3	3	2	5	3	5	3	4	4	5	4	6	5	5	5	3	3	2	2	3	2	4	3	2	3	2	4	2	3	1	3	2	2	4	4	3	3	3	3	2	2	2	1	2	2	3	1
1	21	3	5	2	5	7	5	6	5	5	5	5	3	3	4	5	4	1	2	3	2	3	1	3	3	3	3	1	3	2	3	2	2	2	2	1	3	2	2	1	2	2	1	2	1	2	1	1	3
2	20	2	2	3	3	2	1	2	3	3	3	2	2	1	3	2	2	2	2	3	3	3	4	5	5	4	3	1	2	3	3	4	4	5	3	2	2	4	4	4	3	2	3	2	2	2	3	2	4
1	22	7	6	7	5	7	4	4	5	7	4	5	4	3	2	4	3	2	3	4	3	3	4	3	4	4	3	2	3	3	2	1	2	1	1	1	2	4	4	3	3	3	4	4	3	3	4	4	3
1	24	5	7	7	5	5	4	5	6	5	5	5	7	5	5	6	5	1	3	3	1	2	1	3	1	3	3	2	3	3	2	3	4	3	2	2	3	3	2	3	2	3	3	3	2	2	3	3	3
1	19	1	2	3	3	2	2	1	4	2	3	1	3	4	5	5	3	3	4	3	2	2	5	3	4	5	5	1	2	1	3	1	3	3	1	3	4	2	1	3	1	1	2	2	2	1	2	3	1
1	25	1	3	2	2	4	5	3	3	2	2	3	1	5	3	3	4	4	3	3	4	4	3	3	2	4	3	3	3	3	4	2	3	2	4	3	3	3	3	2	3	2	2	1	2	2	3	3	2
1	23	5	5	7	7	5	7	5	7	4	7	5	7	7	4	7	4	1	2	1	1	3	3	3	1	3	3	2	1	3	2	1	1	2	3	3	3	4	3	3	3	3	4	4	3	4	3	4	3
1	22	5	6	5	5	7	6	4	5	5	7	6	7	5	7	5	7	1	3	1	3	2	2	2	2	2	2	1	3	2	3	1	1	3	1	2	3	3	3	3	4	3	3	4	3	4	3	4	3
1	22	7	4	7	5	2	3	2	2	7	7	6	4	1	2	4	1	1	3	2	2	2	5	4	5	4	3	1	2	2	3	4	5	5	4	3	4	2	2	2	1	1	3	3	3	2	2	3	3
2	20	3	2	2	4	2	4	2	1	2	4	2	4	6	6	6	3	4	4	3	5	3	3	2	4	3	4	1	2	2	3	1	2	1	3	2	3	4	4	3	4	4	2	2	2	3	1	2	4
2	26	7	6	4	4	3	5	4	5	4	5	4	3	4	5	4	5	5	4	3	5	5	2	2	2	2	2	4	4	3	3	1	2	1	3	2	4	1	2	2	2	2	1	1	1	1	2	1	3
2	25	5	6	4	4	6	6	4	4	2	2	4	1	7	5	5	5	1	2	2	3	3	3	3	3	3	3	1	3	3	2	1	2	2	1	3	3	2	2	1	2	2	1	1	1	1	1	2	2
1	25	1	2	1	2	2	2	4	3	6	6	3	3	5	4	3	5	1	2	3	2	3	2	3	3	2	2	1	1	2	2	1	2	1	2	2	3	3	4	4	3	4	4	4	4	3	3	3	4
1	22	6	6	5	4	7	6	6	7	5	7	5	4	5	5	5	5	2	3	3	2	3	2	2	2	4	2	5	5	5	4	3	4	2	4	3	4	3	3	2	3	3	1	2	2	2	1	1	1
1	24	4	7	7	6	5	7	6	5	6	6	6	5	6	7	7	6	1	2	3	3	2	2	2	2	1	2	2	2	2	2	3	1	2	1	2	2	4	4	4	3	3	3	3	4	3	3	3	3
2	20	4	4	5	4	3	3	4	2	1	3	3	3	5	5	5	6	1	2	1	1	3	3	4	3	2	2	2	2	3	3	3	3	3	2	4	4	1	1	1	1	2	1	2	1	2	1	1	2
2	19	4	3	4	2	1	3	1	1	6	5	5	5	4	4	5	5	1	3	3	1	1	1	2	1	2	1	1	1	3	2	1	3	3	2	1	2	1	1	1	1	2	3	3	2	2	2	2	4
2	23	3	3	4	2	5	6	3	3	6	5	5	4	6	4	5	5	1	1	3	1	1	1	2	3	3	2	1	2	3	2	2	2	2	2	2	3	4	2	3	3	3	2	3	2	2	1	2	2
1	21	1	1	4	1	5	3	4	3	2	3	2	3	6	5	3	5	5	3	4	4	5	1	3	3	1	2	5	4	4	5	2	3	2	2	3	4	4	3	2	3	3	1	1	1	2	2	1	4
1	22	7	5	5	5	5	6	4	6	7	7	7	7	6	6	4	7	2	3	2	1	2	3	1	2	1	3	2	2	1	2	1	3	1	2	1	1	4	3	4	4	4	3	4	3	4	4	3	4
1	22	6	3	6	4	5	3	4	6	4	2	5	4	2	1	4	2	1	2	3	3	3	5	5	4	5	3	4	5	4	5	1	2	2	3	2	4	3	3	2	3	3	3	3	3	2	3	2	3
2	24	5	4	5	4	4	2	5	4	3	4	4	3	3	5	2	2	3	3	3	2	3	2	4	3	4	3	1	3	3	2	3	4	3	3	4	5	2	2	2	2	2	4	2	3	3	2	4	3
1	26	2	2	3	2	5	5	6	3	6	5	3	5	1	3	4	3	4	3	3	4	5	1	1	3	1	2	1	1	2	3	5	5	3	4	4	5	4	4	3	3	2	4	2	3	3	3	2	3
2	24	5	5	6	7	4	4	6	5	6	5	5	7	7	7	6	6	1	1	3	3	3	3	3	2	4	4	2	2	3	4	5	5	4	4	1	2	3	3	4	3	3	4	3	4	3	3	3	3
1	25	6	7	5	4	7	4	6	6	5	6	6	5	5	6	6	5	1	1	2	3	1	1	1	2	1	2	2	2	3	1	2	1	3	2	1	2	3	3	3	4	4	3	4	3	3	4	4	4
1	26	4	4	5	3	4	2	5	4	6	5	4	6	3	5	5	4	2	3	2	2	1	1	2	3	2	3	3	2	2	1	3	3	1	3	1	3	2	1	2	3	1	3	2	2	3	2	3	1
1	21	3	4	5	2	4	3	2	3	6	3	5	6	1	3	3	1	5	4	5	4	5	5	5	4	3	4	1	3	2	3	3	4	4	4	4	3	2	1	3	1	2	1	1	2	2	2	1	4
1	24	7	4	6	4	7	6	4	4	5	5	6	5	7	6	6	7	1	3	1	3	3	1	3	2	3	3	2	3	2	3	2	3	1	2	1	3	4	4	3	3	3	4	3	4	4	4	3	4
1	20	2	4	4	1	2	4	3	4	7	4	4	5	2	2	2	4	2	4	2	2	2	5	3	3	4	5	1	2	2	2	2	2	2	3	3	3	4	4	4	3	2	3	2	2	3	3	2	1
1	23	7	5	6	5	6	4	6	3	6	4	6	6	4	5	4	3	1	3	2	3	2	2	2	1	3	3	1	2	1	3	2	3	2	1	2	2	3	3	3	4	4	3	3	3	3	4	4	4
2	20	7	6	6	4	7	6	7	4	7	6	5	6	5	5	5	7	4	3	4	4	3	1	3	3	1	3	1	3	2	3	1	2	3	3	4	5	1	2	2	1	2	1	1	2	2	1	2	2
1	23	5	5	5	5	7	6	4	7	4	7	4	4	5	5	5	5	2	2	2	2	2	2	1	1	3	2	2	3	1	2	2	1	3	3	1	1	4	3	3	4	4	4	4	3	3	4	3	4
1	25	6	5	5	5	3	2	3	5	5	3	3	4	1	4	1	2	5	5	4	3	5	2	2	3	3	3	4	4	3	4	5	4	5	5	5	4	4	3	3	2	4	3	2	3	2	2	2	1
2	22	6	4	3	4	4	3	5	3	2	4	4	3	5	5	5	4	2	2	3	2	2	2	3	2	3	2	4	5	4	4	5	3	5	3	1	1	2	2	2	2	2	3	3	3	3	2	2	3
1	22	2	4	4	2	4	4	3	4	2	4	1	4	5	5	4	4	2	3	3	2	3	1	2	2	2	2	2	2	1	2	3	2	2	3	2	2	3	2	2	2	3	2	1	2	1	2	2	1
1	20	2	4	4	2	4	4	5	3	5	5	4	4	3	3	4	3	1	3	1	3	2	3	3	2	3	3	1	3	2	2	1	3	2	3	5	3	2	1	3	3	3	1	2	1	2	1	1	3
2	20	3	4	2	4	7	5	6	5	1	2	4	1	3	4	3	2	3	3	1	2	3	3	2	3	2	2	3	2	3	3	2	2	2	1	1	2	2	3	1	2	2	3	3	2	3	3	2	1
2	22	7	4	5	7	6	4	4	4	4	5	3	4	3	2	4	4	4	5	5	5	4	5	3	5	5	5	4	3	3	5	3	3	4	4	4	4	4	3	2	3	4	2	2	2	2	2	2	3
2	26	5	3	3	3	7	6	4	5	7	4	7	7	2	3	2	4	5	4	5	5	5	5	4	4	4	4	1	2	2	3	2	3	4	4	4	4	2	2	3	1	3	3	3	3	2	3	3	3
1	23	2	4	2	2	4	5	4	4	5	4	3	5	1	1	2	1	2	4	2	4	2	1	2	2	3	2	1	2	3	2	4	5	5	3	1	1	3	3	2	2	2	2	1	3	2	3	1	1
2	22	4	4	2	3	5	3	5	4	1	2	1	1	6	6	6	6	1	3	2	2	1	1	1	3	2	2	3	2	4	2	4	4	3	5	2	3	1	1	1	1	1	1	2	2	1	1	2	2
2	23	3	3	2	5	6	3	6	6	3	5	5	3	6	5	4	5	2	2	2	3	2	3	3	4	3	3	4	5	4	3	5	3	5	5	5	4	4	2	2	2	2	4	3	3	3	3	3	4
1	20	5	6	5	6	6	6	6	5	5	4	7	7	4	7	4	7	2	3	3	3	3	1	3	3	1	2	3	3	3	3	1	1	3	3	2	4	1	2	1	2	1	3	2	2	2	3	3	1
2	22	7	7	6	4	2	2	4	1	4	2	5	3	6	4	5	3	1	1	3	2	1	2	1	1	2	1	1	3	1	1	3	2	3	2	1	3	3	3	2	3	3	2	3	3	3	2	2	2
1	22	6	4	4	6	5	6	4	3	4	4	3	5	2	2	1	3	3	4	3	4	3	3	4	3	2	2	1	3	2	2	3	4	3	3	2	2	1	2	1	1	2	4	3	2	3	4	3	3
1	20	4	2	5	5	5	3	3	5	5	6	3	5	3	2	3	3	2	2	2	2	3	2	3	1	3	3	2	2	1	1	1	3	3	2	2	3	4	4	2	3	4	3	2	3	3	2	2	2
2	26	6	6	4	6	6	6	4	6	6	4	3	4	4	5	5	2	2	2	1	2	2	2	2	2	2	2	1	3	3	2	3	3	3	2	1	1	4	3	4	2	2	4	3	4	2	3	3	3
1	24	7	5	4	7	5	4	4	5	5	6	4	5	7	6	5	6	3	3	3	4	2	4	4	4	5	5	2	2	4	3	3	4	4	3	1	3	1	1	1	1	1	4	3	2	3	2	2	2
2	22	6	4	3	5	7	6	5	5	1	3	3	3	7	6	5	5	4	5	3	4	4	3	2	3	4	3	1	2	2	2	2	2	3	4	5	5	3	3	2	2	2	4	3	3	4	3	4	3
2	22	4	3	3	4	3	4	3	4	4	5	3	3	1	1	4	1	5	5	4	3	4	2	4	2	4	3	5	5	5	4	5	5	4	3	1	3	1	1	2	2	1	2	3	2	1	2	1	1
1	26	3	2	3	2	5	4	5	5	7	5	6	4	4	5	3	5	4	3	3	4	4	3	3	3	2	2	4	3	3	4	4	5	3	5	1	2	3	3	2	3	3	4	3	3	3	4	3	3
2	22	7	6	5	4	4	3	2	5	7	5	4	5	7	4	6	5	4	4	3	5	3	1	3	1	1	3	1	1	3	2	1	2	3	2	4	3	2	2	2	3	2	4	2	3	4	4	3	1
1	24	4	3	4	5	3	3	4	4	5	6	3	3	2	2	3	2	2	3	3	3	2	3	2	4	3	2	5	5	4	4	3	3	3	4	3	4	2	1	1	2	1	3	2	3	3	2	3	1
2	20	7	5	4	7	4	4	5	4	1	2	3	2	3	2	2	4	3	4	3	3	3	2	2	2	4	3	5	4	3	4	3	2	3	3	3	4	2	1	2	1	2	1	2	1	1	2	2	3
1	22	7	5	5	5	4	2	5	2	4	2	3	2	7	5	5	6	3	2	3	3	4	2	3	3	3	3	5	5	4	4	2	3	3	2	5	4	2	1	1	2	3	1	2	2	2	2	2	1
2	22	6	3	4	4	4	4	5	2	6	6	6	4	4	2	2	4	1	3	2	2	2	5	3	5	5	5	4	4	3	5	1	3	2	2	3	4	4	2	3	2	4	3	3	3	3	3	3	2
1	20	6	4	4	5	3	5	3	3	3	4	5	3	1	2	3	4	1	2	2	3	1	4	5	4	5	4	4	3	5	3	2	2	3	2	5	4	2	2	2	1	2	4	3	3	2	3	3	4
2	22	4	3	5	2	1	3	4	4	3	4	4	4	5	3	3	6	1	1	3	3	3	4	5	3	5	4	1	1	2	1	4	3	3	5	2	3	2	2	1	3	3	1	1	1	1	2	1	4
2	22	6	4	4	5	6	6	5	6	6	5	6	4	5	6	5	4	1	2	1	2	1	1	3	3	1	3	1	2	3	1	2	1	1	1	2	3	2	1	2	2	2	3	2	3	2	3	3	3
1	21	4	5	5	3	5	4	4	4	4	4	4	3	5	3	5	3	5	4	5	4	5	3	3	2	4	3	4	3	3	3	4	4	3	4	2	4	1	2	2	1	1	3	3	3	2	3	2	3
1	22	2	1	4	4	5	3	3	3	3	3	2	4	6	4	4	4	2	3	3	2	3	4	3	3	3	3	3	4	3	2	5	4	5	5	4	3	1	2	2	1	2	2	1	3	3	1	3	2
2	22	4	3	5	4	3	3	5	5	1	1	1	2	1	1	3	1	4	4	3	5	4	5	5	3	4	4	2	2	3	2	4	4	3	4	4	3	4	4	3	3	4	2	2	1	2	3	2	3
1	20	6	5	5	6	4	7	7	5	6	7	6	7	5	6	6	5	1	3	1	3	3	1	1	1	3	1	3	2	3	3	2	1	3	1	2	1	4	4	4	4	4	4	4	3	3	4	3	3
1	20	5	3	3	5	4	3	4	5	7	6	6	5	3	3	4	3	1	2	2	2	1	4	4	5	4	3	2	4	3	2	2	2	3	4	5	3	3	2	2	3	3	2	2	2	2	2	1	4
2	26	5	3	4	5	5	4	3	4	6	5	3	4	2	4	1	3	2	3	4	2	4	3	4	3	2	4	3	4	4	4	5	4	5	4	2	4	3	2	2	2	3	4	3	3	3	4	3	3
2	22	2	1	3	4	5	5	5	5	6	5	6	5	5	4	4	4	2	3	3	2	3	4	3	3	3	4	4	5	3	5	3	3	2	3	1	3	1	1	1	2	2	4	3	2	3	3	2	3
2	25	7	4	5	6	7	7	5	4	2	4	2	3	2	2	3	3	1	3	2	1	1	1	3	2	1	2	4	4	4	4	1	3	2	3	5	4	4	2	3	3	3	2	3	2	2	2	3	4
2	21	6	5	6	5	7	4	6	7	6	3	5	5	3	3	3	3	1	2	2	1	3	5	5	5	4	4	3	3	3	4	2	3	4	3	3	3	3	3	3	2	3	2	1	1	2	2	3	1
2	21.75	2	2	4	1	5	3	3	5	3	5	3	5	3	4	2	3	1	3	3	3	1	1	3	2	1	2	2	2	2	1	1	1	3	3	2	3	4	4	3	3	4	3	3	3	3	4	3	4
1	19	6	6	4	5	5	6	5	4	7	6	7	5	7	5	4	6	2	1	2	2	2	1	1	2	3	2	2	3	2	3	1	1	3	3	2	1	3	3	4	3	4	3	4	3	3	3	3	3
1	22	1	2	4	3	3	4	2	4	2	4	1	4	2	4	2	3	4	4	4	4	4	1	2	1	1	1	4	4	3	3	3	2	3	2	1	2	4	3	2	3	2	2	2	3	3	2	3	4
1	27	7	6	4	6	7	6	7	7	7	6	5	5	6	7	5	6	2	2	3	1	1	3	1	3	1	1	2	1	2	2	2	2	1	1	2	3	3	4	4	3	4	4	4	4	3	3	4	4
1	20	5	6	4	5	1	4	3	2	2	3	3	2	6	4	5	3	3	2	4	3	3	3	2	2	3	3	1	1	3	2	1	1	3	3	3	4	3	2	3	2	2	3	2	3	2	2	3	2
1	24	5	4	4	5	5	5	3	4	1	3	2	3	6	6	5	3	5	3	5	4	4	3	3	3	4	3	2	3	2	2	4	5	4	4	2	3	2	1	2	1	3	2	2	1	3	1	2	2
2	20	2	3	3	4	1	3	3	4	4	3	3	4	1	3	3	3	2	2	3	2	2	5	4	3	5	4	5	5	3	4	1	1	3	2	1	3	4	4	2	3	2	1	1	2	2	1	1	4
1	23	3	4	2	2	1	1	2	2	1	3	2	4	4	5	2	5	3	3	4	3	2	1	1	1	2	2	4	3	3	4	1	3	2	2	2	2	4	4	2	2	2	3	2	2	3	2	3	4
1	22	7	7	6	7	4	5	6	6	5	4	7	5	6	5	4	5	4	4	4	3	3	1	3	3	1	1	5	4	4	4	1	3	3	1	3	4	3	3	2	2	3	3	2	3	3	3	3	2
2	23	6	3	3	4	2	3	2	4	5	3	6	4	3	4	4	5	3	4	4	3	4	2	4	2	3	2	4	3	3	3	5	3	5	4	3	4	2	1	2	1	1	4	3	3	3	3	2	3
2	22	7	6	4	6	6	6	5	5	6	4	6	6	7	7	7	4	3	1	1	2	1	2	3	3	3	2	3	3	2	2	1	2	2	2	2	2	4	4	4	4	4	4	3	4	3	3	4	3
2	24	2	4	3	3	7	5	6	6	2	3	4	1	6	4	5	3	4	5	4	4	4	1	3	2	2	1	5	5	3	3	3	3	4	3	1	2	1	2	1	2	2	4	4	4	2	3	3	4
1	18	7	4	4	6	2	2	3	3	3	4	3	2	5	5	5	5	2	3	2	3	3	2	1	1	2	2	3	2	1	3	2	2	3	3	3	3	1	2	1	1	1	3	3	3	3	3	3	1
1	20	5	5	4	4	2	2	3	4	2	3	3	3	1	3	1	3	5	5	3	4	5	1	1	1	3	3	1	2	2	3	2	2	4	3	5	5	1	2	2	2	2	2	2	2	2	2	3	3
1	21	7	4	5	6	5	4	5	5	6	6	6	5	6	6	4	5	2	1	1	1	1	1	1	1	3	1	1	3	1	1	2	3	1	2	3	3	3	2	2	2	2	3	2	3	2	2	3	3
2	24	6	4	7	4	5	7	5	4	5	4	4	6	7	4	7	7	2	2	1	2	1	3	2	1	3	3	3	1	1	3	1	3	1	2	2	2	4	3	3	4	4	4	4	3	3	4	3	4
1	23	5	5	5	5	5	5	7	4	6	5	4	5	4	7	7	7	2	1	2	2	2	1	3	3	1	1	2	2	1	2	1	3	1	3	2	2	3	3	3	4	3	3	4	3	3	3	3	3
1	24	7	7	7	6	7	7	4	4	5	7	7	6	5	5	7	6	1	1	2	3	2	1	2	3	3	1	2	3	3	3	1	3	2	1	1	3	3	3	3	4	3	4	3	4	4	4	4	3
1	23	7	7	4	5	6	6	5	4	7	4	5	5	6	5	5	3	1	3	2	1	2	2	4	2	3	3	2	2	3	3	5	4	4	4	3	4	2	2	3	3	3	3	3	3	3	3	3	1
1	25	4	3	4	3	7	6	4	6	1	1	2	3	3	4	4	2	2	3	3	2	3	1	2	2	3	3	2	2	1	2	2	1	2	1	1	2	4	4	3	2	3	2	3	2	1	3	1	2
2	22	6	6	5	5	7	4	6	4	2	2	3	2	3	3	4	2	2	3	2	3	3	4	5	4	3	4	2	4	2	2	3	4	4	4	4	3	3	3	3	3	3	1	2	2	1	2	2	3
1	22	5	3	3	5	3	2	3	3	4	4	3	3	2	2	4	2	3	3	4	4	4	2	3	3	3	3	5	5	4	5	1	3	2	3	2	3	4	3	4	2	2	3	3	2	2	3	3	1
1	22	7	6	6	6	7	4	6	4	7	7	7	7	7	5	6	5	2	1	2	3	2	2	2	1	1	1	2	1	1	2	2	3	2	2	3	3	4	3	4	4	3	4	4	4	4	4	3	4
2	19	5	4	7	7	5	6	7	6	5	5	6	6	6	4	4	6	1	2	3	1	1	3	1	1	2	1	2	2	1	2	1	3	2	2	2	2	4	3	4	4	3	4	4	3	3	3	3	4
1	23	1	3	1	1	2	1	2	2	4	3	2	5	6	5	5	5	2	3	3	3	2	5	4	5	4	4	4	5	4	4	5	4	5	5	2	2	4	3	3	2	4	4	3	4	3	4	3	3
1	23	2	3	2	2	1	1	2	3	7	4	4	4	5	3	3	5	1	3	1	2	2	2	2	1	2	3	1	3	2	2	2	1	2	2	2	1	2	3	1	3	2	4	2	3	4	2	3	2
1	23	1	3	1	4	2	2	1	1	3	3	4	3	2	2	2	2	5	5	5	3	4	3	4	3	3	3	3	2	4	4	4	3	4	3	5	4	4	3	3	4	3	2	2	2	2	3	2	3
1	22	4	6	5	6	6	4	4	5	5	6	5	5	7	5	4	6	1	3	2	3	3	2	2	2	2	1	2	2	3	2	1	1	2	1	1	2	3	4	3	4	3	4	4	3	4	3	4	4
2	26	4	3	5	3	7	6	6	4	2	4	1	4	3	5	5	5	2	3	2	2	2	5	3	4	5	4	1	3	2	1	3	4	2	3	5	3	2	2	3	3	3	3	3	2	2	2	3	4
2	26	6	5	4	5	7	5	6	4	6	7	4	4	7	4	7	7	1	1	3	3	3	1	1	2	1	1	2	2	2	1	2	2	2	2	2	2	4	4	4	3	3	4	3	4	4	4	3	3
1	22	3	4	2	3	5	5	5	4	4	5	4	2	2	1	3	2	1	3	2	1	3	3	4	3	4	3	2	2	4	3	1	3	2	3	3	4	2	2	2	3	2	3	2	3	3	3	3	4
1	23	6	6	4	5	6	5	6	5	3	3	3	4	5	3	5	5	5	5	4	4	4	5	5	4	4	5	1	3	2	1	3	3	4	2	2	3	3	2	3	2	3	1	2	2	1	2	2	4
[truncated: 27 more columns]
